# Supplementary material for: ABCC5 supports osteoclast formation and promotes breast cancer metastasis to bone
Source: Breast Cancer Res. 2012 Nov 22;14(6):R149. doi: 10.1186/bcr3361 (PMC4053136; doi:10.1186/bcr3361)
Supplement: Additional file 5 — Microarray data. This is a list of differentially expressed probes between bone-trephine biopsies from breast cancer patients and primary breast tumors metastatic to skeleton. [file bcr3361-S5.XLSX]

## Sheet: Metadata
# Use this template for a Agilent two-color experiment submission.
# Normalized data are provided in a Matrix table. Click on additional worksheet tabs below for examples.
# Incomplete submissions will be returned. Click the Metadata Example tab below to view a completed worksheet.
# Field names (in blue on this page) should not be edited. Hover over cells containing field names to view field content guidelines or,
# CLICK HERE for Field Content Guidelines Web page.
SERIES
# This section describes the overall experiment
title	ABCC5 supports osteoclast formation and promotes breast cancer metastasis to bone
summary	Bone is the primary site of breast cancer metastasis and complications associated with bone metastases can lead to a significantly decreased quality of life in these patients. Thus, it is essential to gain a better understanding of the molecular mechanisms that underlie the emergence and growth of breast cancer skeletal metastases. Methods: To search for novel molecular mediators that influence b…
overall design	primary breast tumors vs. bone trephine biopsies
contributor	Peter Siegel
contributor	Anna Mourskaia
contributor	Sean Cory
SAMPLES
# The Sample names in the first column are arbitrary but they must match the column headers of the matrix table (See next worksheet).
# CLICK HERE to find the accession number (GPLxxxx) of the Agilent platform deposited in GEO.
# 2 versions of each Agilent platform are represented in GEO, one with Agilent Feature Numbers in the ID column, one with Agilent Probe Names.
# Select the Accession Number of the platform which best aligns with the normalized data. Include the accession number in the platform column.
Sample name	title	raw data file	ch1: source name	ch1: organism	ch1: characteristics: tissue	ch1: molecule	ch1: label	ch2: source name	ch2: organism	ch2: molecule	ch2: label	description	platform
Sample 1	BONE 1	US22502628_251485053488_S01_GE2-v5_95_Feb07_1_1.txt	BONE 1	Homo sapiens	Bone trephine	total RNA	Cy3	Universal Human Refence RNA	Homo sapiens	total RNA	Cy3	BONE 1	GPL2872
Sample 2	BONE 2	US22502628_251485053488_S01_GE2-v5_95_Feb07_1_2.txt	BONE 2	Homo sapiens	Bone trephine	total RNA	Cy3	Universal Human Refence RNA	Homo sapiens	total RNA	Cy3	BONE 2	GPL2872
Sample 3	BONE 3	US22502628_251485053488_S01_GE2-v5_95_Feb07_1_3.txt	BONE 3	Homo sapiens	Bone trephine	total RNA	Cy3	Universal Human Refence RNA	Homo sapiens	total RNA	Cy3	BONE 3	GPL2872
Sample 4	BONE 4	US22502628_251485053488_S01_GE2-v5_95_Feb07_1_4.txt	BONE 4	Homo sapiens	Bone trephine	total RNA	Cy3	Universal Human Refence RNA	Homo sapiens	total RNA	Cy3	BONE 4	GPL2872
Sample 5	BONE 5	US22502628_251485053489_S01_GE2-v5_95_Feb07_1_1.txt	BONE 5	Homo sapiens	Bone trephine	total RNA	Cy3	Universal Human Refence RNA	Homo sapiens	total RNA	Cy3	BONE 5	GPL2872
Sample 6	PRIMARY 1	US22502628_251485053489_S01_GE2-v5_95_Feb07_1_2.txt	PRIMARY 1	Homo sapiens	Primary Tumor	total RNA	Cy3	Universal Human Refence RNA	Homo sapiens	total RNA	Cy3	PRIMARY 1	GPL2872
Sample 7	PRIMARY 2	US22502628_251485053489_S01_GE2-v5_95_Feb07_1_3.txt	PRIMARY 2	Homo sapiens	Primary Tumor	total RNA	Cy3	Universal Human Refence RNA	Homo sapiens	total RNA	Cy3	PRIMARY 2	GPL2872
Sample 8	PRIMARY 3	US22502628_251485053489_S01_GE2-v5_95_Feb07_1_4.txt	PRIMARY 3	Homo sapiens	Primary Tumor	total RNA	Cy3	Universal Human Refence RNA	Homo sapiens	total RNA	Cy3	PRIMARY 3	GPL2872
Sample 9	PRIMARY 4	US22502628_251485053490_S01_GE2-v5_95_Feb07_1_1.txt	PRIMARY 4	Homo sapiens	Primary Tumor	total RNA	Cy3	Universal Human Refence RNA	Homo sapiens	total RNA	Cy3	PRIMARY 4	GPL2872
Sample 10	PRIMARY 5	US22502628_251485053490_S01_GE2-v5_95_Feb07_1_2.txt	PRIMARY 5	Homo sapiens	Primary Tumor	total RNA	Cy3	Universal Human Refence RNA	Homo sapiens	total RNA	Cy3	PRIMARY 5	GPL2872
PROTOCOLS
# Protocols which are applicable to specific Samples or specific channels can be included in additional columns of the SAMPLES section instead.
growth protocol	Histological sections of primary breast tumors or bone metastases were H&E stained and examined by a clinical pathologist to identify regions within each section suitable for Laser Capture Microdissection (LCM).
extract protocol	Total RNA (1-2.5ng) from microdissected material was subjected to two rounds of linear amplification using a RiboAmp HSPlus Amplification Kit (Cat. #: KIT0525, Applied Biosystems) following the manufacturer’s protocol.
label protocol	The profiles of resulting amplified RNA (aRNA) were assessed using a 2100 Bioanalyzer (Agilent Technologies). The aRNA samples (5μg) were conjugated to Cy3 dye using an Arcturus Turbo Labeling Kit (Cat. #: KIT0609, Applied Biosystems). Universal human reference RNA (Stratagene) was amplified using the same procedure and labeled with Cy5 dye (CAT # KIT0619, Applied Biosystems).
hyb protocol	Oligoarray control targets and hybridization buffer (Agilent In Situ Hybridization Kit Plus) were added, and samples were applied to microarrays enclosed in Agilent SureHyb-enabled hybridization chambers. After hybridization, slides were washed sequential
scan protocol	Images were quantified using Agilent Feature Extraction Software (version A.8.5.1.1).
data processing	Microarray data were extracted using Feature Extraction Software v. 9.5.3.1 (Agilent Technologies). The arrays were normalized using normexp background correction, loess within array and quantile between array normalization.
value definition	normalized log10 ratio (Cy5/Cy3) representing test/reference

## Sheet: Matrix
# Example of a matrix table for a Agilent 2 color submission. Only column headers are shown.
# The identifiers in the ID_REF column must be unique and match the identifiers in the ID column of the referenced platform (GPLxxxx).
# 2 versions of each Agilent platform are deposited in GEO, one with Agilent Feature Numbers in the ID column and one with Agilent Probe Names (e.g., A_23_P158231).
# The matrix table should contain normalized log ratio (preferably test/reference) data.
# Values that should be disregarded may either be left blank or labeled as "null".
ID_REF	Sample 1	Sample 2	Sample 3	Sample 4	Sample 5	Sample 6	Sample 7	Sample 8	Sample 9	Sample 10
A_23_P100001	-2.27187	-3.19708	-3.23272	-2.50541	-3.8453	-0.350679	-2.34712	-2.68733	-3.71246	-3.74936
A_23_P100011	0.499392	-0.24847	-0.545733	-0.49586	-0.236177	-0.741947	0.308422	-0.514943	0.453634	-0.256825
A_23_P100022	0.586308	0.497896	0.137062	0.418418	0.803266	0.715202	0.188906	1.66883	-0.41252	0.395419
A_23_P100056	1.28644	1.39453	1.34517	1.82712	1.1091	1.63149	1.39814	1.78175	1.69319	1.13016
A_23_P100074	1.29015	0.393003	1.49531	3.7885	2.27028	-0.7078	0.843687	2.67239	0.108305	-0.346954
A_23_P100092	0.16088	0.145101	0.105831	1.20968	0.672262	1.04749	0.390323	-0.113182	0.097399	-0.309251
A_23_P100103	-0.382832	0.951833	0.569528	0.260322	0.145965	1.02024	1.5781	0.535494	-1.41833	-0.486602
A_23_P100111	1.00694	0.932879	0.964988	0.337539	1.15393	-0.115538	0.46339	1.52156	-0.253158	-0.0579067
A_23_P100127	-0.233752	-0.530137	-0.0907336	0.103142	-0.747631	-0.139337	-0.543298	-1.12055	-1.72664	-0.366017
A_23_P100133	-0.14332	0.57166	0.424753	-0.112499	-0.717511	-0.0348953	0.0962314	-0.191232	0.0535521	0.0883398
A_23_P100141	1.2988	1.40802	0.207028	0.429068	0.58485	1.20181	1.06276	0.667003	1.50839	-0.138804
A_23_P100156	-0.304273	-0.113314	-0.671973	-0.0340978	-0.0139384	-0.0657151	-0.447116	-0.3408	0.00343906	-0.0577854
A_23_P100177	-0.259417	-0.0534608	-0.0458353	-0.34178	0.463417	-0.123376	-0.252095	-0.30676	-1.7381	-0.0529511
A_23_P100189	-1.11633	-0.415734	-0.496413	-1.20367	-0.396176	-0.535458	-0.766096	-0.234205	-0.389468	-0.82129
A_23_P100196	0.331211	1.87435	1.28842	-0.00886114	2.57192	1.26036	2.50457	1.37906	1.46423	1.91661
A_23_P100203	2.26047	1.08772	1.33567	1.45974	2.39064	2.17606	1.30306	1.15476	1.52068	1.67144
A_23_P100220	-1.50862	-1.60246	-0.26412	-2.72452	-0.896926	-0.187072	-2.06122	-2.9028	-1.68268	-1.83283
A_23_P100240	-0.385962	-0.0262624	0.0869768	-0.125934	-0.520637	-0.336663	-0.138247	-0.875843	-0.0203635	-0.572715
A_23_P10025	0.772196	-0.548319	0.787849	-1.05772	-2.21237	1.3261	0.942559	0.609317	1.28114	1.48905
A_23_P100263	-0.699442	-0.443889	-0.4989	-1.03538	-3.63443	-1.08236	-1.68905	-2.65786	-1.92231	-2.09681
A_23_P100278	-1.79961	-1.24346	-0.534429	-1.62238	-1.91367	-2.43369	-2.40307	-2.1329	-1.02354	-1.60356
A_23_P100292	0.683116	0.295226	0.108339	-0.294893	0.54454	0.246195	-0.128392	0.0962087	-0.303017	-0.423211
A_23_P100315	0.0241481	0.30352	-1.88585	-0.831685	-0.952675	-0.296039	-0.971703	-0.939328	0.306465	-1.34391
A_23_P100326	0.685966	1.95542	0.72487	-0.567957	-1.23213	0.31803	-1.33988	-0.647342	-0.849203	-1.54211
A_23_P100341	-0.722932	0.269886	0.30728	-0.255909	-0.402108	0.250872	-0.306276	-0.486	0.161117	0.0848748
A_23_P100344	0.710872	0.734607	0.806184	0.728316	1.13895	0.693967	0.810435	1.16764	0.89882	0.997581
A_23_P100355	-0.158256	-0.225143	-0.388794	-1.14427	-0.713976	-0.762278	-1.19187	-1.07609	-1.24856	-0.991359
A_23_P100386	-1.10913	-0.46422	-0.0540322	-1.71917	-0.646357	-0.272439	-0.483048	-0.435246	-0.298355	-0.766227
A_23_P100392	0.210637	2.01388	0.058718	-0.123054	-0.999577	-2.0762	-0.634058	0.0088168	-2.21967	-0.495429
A_23_P100408	-1.60065	-0.813288	-0.481726	-1.62785	-1.10816	-2.05324	-1.25239	-1.31978	-1.07997	-0.877064
A_23_P100413	-0.803385	-0.597112	-0.474745	-0.801454	-1.25422	-1.48252	-1.48108	-1.27044	-1.01075	-0.988372
A_23_P100420	0.396655	-0.515879	0.773414	0.329857	2.82769	1.74502	0.866402	0.921367	1.62883	1.59362
A_23_P100441	1.22652	0.763779	0.186744	-0.0510412	0.670199	0.6507	1.55722	-0.0460913	0.940827	0.800382
A_23_P100455	0.195023	0.45939	1.95444	-0.334741	1.87592	-0.491121	1.35984	-0.145051	-0.751321	1.61575
A_23_P100469	0.679239	0.803448	0.728383	0.0223726	0.372808	0.112291	0.523452	0.497387	0.230743	0.778599
A_23_P100478	0.471422	1.33299	0.333477	0.389501	1.12113	0.605577	-0.477751	0.0554663	0.214194	0.182748
A_23_P100486	3.07823	2.28608	0.857913	1.58004	2.30176	1.18311	1.16095	2.06449	1.70242	0.878058
A_23_P100499	-0.706635	-0.549128	-0.201082	-0.779114	-0.260271	0.0256214	-0.427239	-0.986559	0.0956133	-0.203372
A_23_P100501	0.29054	-0.253656	-0.900947	-0.451419	-1.70123	-0.907682	-0.719353	-1.41012	-1.93416	-1.4665
A_23_P100517	0.521914	0.533968	0.21698	0.627934	0.459365	0.467201	0.859692	-0.0100891	0.17411	0.976711
A_23_P100522	-0.432166	0.183678	0.366204	0.081685	-0.412923	-0.148705	-0.419696	-0.753972	-0.235494	-0.310445
A_23_P100539	0.0371817	-0.0613185	-0.0176959	0.270878	0.374345	0.477879	0.681898	-0.587859	-0.224428	-0.15527
A_23_P100556	0.596813	0.391057	0.322962	1.12616	0.165532	0.789347	0.391957	-0.0825648	1.30153	0.216818
A_23_P100576	4.2833	1.90724	2.27488	2.13569	2.50825	2.03722	2.82713	0.624133	1.44137	1.59722
A_23_P100583	-0.125749	-0.381334	-0.153332	0.0153155	0.809239	-0.192284	0.00510448	0.220296	1.72336	1.36699
A_23_P100595	-0.352899	-1.00018	-0.0390932	-0.189999	-1.6709	-0.783305	-1.06705	-0.63989	-1.51936	0.719525
A_23_P10060	-0.476429	0.26879	-0.178875	-0.0593377	-0.867595	-0.603865	-0.160654	-1.12267	-0.692543	-0.152565
A_23_P100602	0.189955	0.275514	0.426136	-0.0984124	0.292302	-0.272768	-0.437981	0.190172	-0.683799	0.318851
A_23_P10062	-0.949545	0.0110895	-0.383653	-0.614783	-1.65377	-0.141693	-0.299104	-0.279667	0.424382	-1.57108
A_23_P100632	-0.202408	-0.238389	1.36514	-1.46992	1.6577	-0.405752	-0.210991	-0.411201	-0.100895	-0.697461
A_23_P100642	-0.70027	0.485132	1.04257	-3.66698	-0.505455	-0.0870063	-1.10459	-1.15293	0.163765	-0.277871
A_23_P100654	-0.632034	-0.868062	-0.971546	0.0669228	-0.201276	0.732602	0.226648	0.296278	0.737739	0.352284
A_23_P100660	0.565623	-0.813619	-0.630972	2.01917	-0.325099	0.76536	0.663306	1.2197	2.65732	1.06626
A_23_P100676	-0.752593	-0.565167	-0.548587	-2.64979	-1.10381	-0.61632	-0.409511	-0.645258	-0.584765	-0.419312
A_23_P100693	-0.621042	0.103889	-0.238284	-0.196535	1.35687	0.448845	0.881992	0.426688	1.05009	0.941076
A_23_P100704	1.81678	1.56545	1.40093	1.71702	1.90566	1.41288	2.1498	0.812194	1.392	2.15741
A_23_P100711	-0.350819	-2.50378	-0.746342	0.656263	-0.727299	-1.04183	-0.349738	1.07029	0.545566	-0.844698
A_23_P100730	-3.58263	-3.24137	-3.84867	-2.91943	-2.83282	-2.33389	-3.27136	-4.43191	-2.60023	1.64718
A_23_P100754	0.430667	-0.587302	0.784511	0.380825	0.157225	-0.257318	-0.314956	0.331573	-0.26839	-0.441534
A_23_P100764	0.871296	-0.48241	0.207012	-0.388042	0.425487	0.598211	1.09713	0.822561	-0.228274	0.256019
A_23_P10077	-0.0737128	0.348656	0.310208	-0.198365	0.245838	-0.358661	0.261111	-0.434964	0.144476	0.598056
A_23_P100779	-0.372282	-0.0993336	-0.338075	-0.522171	-0.414149	-0.606798	-0.757472	-1.00881	0.448863	-0.130404
A_23_P100788	0.460717	-0.164135	0.665118	0.203913	0.923879	0.526573	0.944329	0.30439	-0.194873	0.215858
A_23_P100795	-1.14235	0.0521543	0.229379	0.0919024	-3.48181	-2.79643	-2.93551	-2.76846	-2.17153	-1.79861
A_23_P100802	-0.236645	-2.18397	-1.47971	-1.75123	-0.577803	-0.231539	-0.232193	-1.79372	-0.181134	-0.187645
A_23_P10081	-0.0731951	1.20352	0.179699	0.128806	0.269118	0.446118	0.165818	0.541248	0.360526	0.0329335
A_23_P100868	1.23104	1.29299	2.35327	0.394506	1.94917	1.35845	-0.319873	0.732149	0.638023	1.1564
A_23_P100872	-2.07127	-0.229755	-0.0747817	-0.371886	-1.81176	-1.2184	-1.22634	-1.27838	-1.11398	-0.688925
A_23_P100883	-0.341357	-2.17987	-1.37635	-1.04604	0.877208	1.74521	1.09985	0.136223	2.01937	1.59058
A_23_P10091	-0.463733	-0.207488	0.157932	0.0281792	-0.631928	-0.378533	-0.373179	-0.378924	-0.222415	0.889153
A_23_P100912	0.101556	-0.358798	-0.388781	-0.0829902	-0.437126	-0.133841	-0.728237	-0.410611	-0.745881	-1.44839
A_23_P100931	-0.0711774	-0.429117	-0.232398	0.445393	0.221056	-0.272892	0.075015	-0.222885	-0.299503	-0.157296
A_23_P100935	0.371433	-0.0248295	-0.527273	-0.806527	-0.761268	-1.04406	-0.168171	-0.372301	-0.402792	-0.767262
A_23_P100959	-0.407319	-0.417003	-0.840421	-0.791193	0.0602962	0.361211	-0.398997	-0.706463	-1.36081	-0.350641
A_23_P100963	-0.465199	0.0665596	-0.182934	-0.524932	-0.835158	-0.214266	-0.283022	-0.312434	-1.05654	-0.308536
A_23_P100990	-0.684538	-0.084543	-0.498035	-0.479575	-0.648039	-0.261453	-0.313084	-0.510642	1.04119	0.194848
A_23_P100991	0.370633	1.33893	-0.0169528	0.144298	-0.346501	0.0623188	-0.0467304	0.0556728	0.206221	0.130987
A_23_P101007	-0.197674	-0.224488	-0.0760834	-0.212535	-0.653727	-0.0665683	-0.369824	-0.42252	-0.314544	0.0765105
A_23_P101013	1.62113	0.510297	0.401579	0.667447	1.14627	1.34666	1.75044	0.901331	0.476538	0.716162
A_23_P101025	0.0671374	-0.626384	-0.670643	-0.491244	-0.406	0.153681	-0.134476	-0.171622	-0.866613	-0.841156
A_23_P101038	0.703172	-1.03022	0.451752	1.64786	-0.814509	0.903947	1.13623	-0.173633	0.74813	0.220071
A_23_P101048	-0.230633	0.293111	0.0595277	0.131391	-0.197233	-0.112617	0.0802145	0.0986917	-0.515886	-0.191328
A_23_P101054	0.851748	1.21249	0.794492	0.839629	0.999218	-0.511917	1.09268	0.41684	1.95277	2.88476
A_23_P101073	-0.0481282	-0.276559	-0.0784695	-0.310738	-0.325152	0.0127419	-0.0659982	-0.702406	-0.417482	-0.321388
A_23_P101084	-0.461742	-0.114168	0.0914566	-0.24759	-0.293741	-1.67153	-0.591174	-0.544357	-0.419659	0.0300551
A_23_P101093	1.20163	1.12118	1.84279	2.05577	0.894775	-0.637448	0.301959	0.336732	1.57593	0.996958
A_23_P101111	0.220273	-0.223731	-0.540095	-1.13838	0.253	0.248779	0.536928	-0.00147377	-0.132751	-0.530214
A_23_P101121	-0.369758	0.480308	0.231401	-0.252571	1.39187	-0.492661	-0.369476	2.32043	-0.537254	0.357558
A_23_P101131	-3.8857	-4.36501	-6.40639	-0.417329	-2.55066	-7.26886	-7.38248	-6.11924	-0.367198	-3.3085
A_23_P101141	-0.456806	-0.0577381	-0.15559	-0.1135	1.14439	-0.107253	0.727492	0.110417	-0.477029	0.146347
A_23_P101185	0.650967	-0.247737	0.501949	1.1401	1.17893	1.29473	0.54429	0.682597	1.12639	0.389414
A_23_P101193	-1.31834	-1.48174	-0.117121	-1.38322	-0.678739	-1.56597	-2.53755	-1.14032	-1.51871	-2.0847
A_23_P101208	0.460182	-0.347947	-1.0722	-1.41138	-2.27682	1.23379	-2.2658	-0.302092	-2.25254	-3.29766
A_23_P10121	0.888045	1.12819	1.05032	0.911384	0.9474	-0.0936295	1.01649	0.662369	1.53548	1.18584
A_23_P101237	1.53997	0.819916	0.993575	0.947147	1.40615	-0.633415	1.87034	1.04038	1.69075	0.539196
A_23_P101240	-0.211825	-0.172118	0.701966	3.03885	0.99157	0.273441	1.45519	0.0279372	1.87049	1.10142
A_23_P101246	0.857695	0.87344	2.16673	1.54759	0.464038	0.73023	1.87705	-1.79378	0.154414	-0.26177
A_23_P101253	0.0987236	1.01633	0.730481	1.34255	1.39749	1.32818	1.919	0.480899	0.778928	0.41628
A_23_P101258	1.53127	-0.355266	0.286668	0.295207	0.625477	-0.0703479	0.343015	0.0182398	-0.439019	0.453557
A_23_P10127	5.28866	3.87252	6.10695	6.16408	5.27788	0.772742	6.8755	5.67891	5.15636	5.49962
A_23_P101272	-1.95358	-1.26854	-1.82106	-4.79413	-1.35224	0.0927276	-1.94274	-1.50613	-1.1233	-1.21283
A_23_P101281	0.287855	-0.0624998	-0.45196	-0.689753	0.68857	1.90595	0.307045	-1.42557	-0.381371	0.763829
A_23_P101297	-0.499329	-0.292246	-0.230825	-0.624432	-0.48677	-0.92868	-1.05385	-0.750954	-0.256681	-0.40833
A_23_P101303	0.192108	-0.261869	0.310253	-1.51089	-0.400951	-0.274173	-0.487932	-0.205824	-0.955308	-0.0683911
A_23_P101308	-0.377122	0.376262	-0.0978477	0.0897412	0.476241	-0.168228	0.240043	-0.094083	-0.652424	-0.431219
A_23_P101319	-0.297418	0.22611	-0.0908455	-0.0992771	-0.347671	-0.434436	0.584979	0.424145	-0.415926	0.276686
A_23_P101321	-2.21663	-0.230527	-0.448344	0.152719	-0.862874	-1.29688	-1.50006	-1.2046	-0.973653	-1.82692
A_23_P101332	0.0453559	0.559844	-0.66216	-1.68387	-0.366016	-0.132261	-1.16496	-1.17381	-1.03195	-1.10156
A_23_P101342	-2.42902	-0.879252	-0.641953	-0.560369	-4.00363	-2.63044	-2.59502	-2.97136	-2.37036	-1.75606
A_23_P10135	-0.000861812	0.385421	0.223777	-0.792934	-0.521092	0.38176	0.609216	0.264707	0.179574	0.0640907
A_23_P101351	1.48654	1.52281	0.0581137	0.558716	0.357226	1.85128	1.97981	1.10088	1.19102	0.467934
A_23_P101374	0.0979777	0.770791	0.266061	-0.320837	-1.03486	0.55983	0.591704	0.505512	0.0375659	-0.524789
A_23_P101380	-2.53262	-2.15301	-2.25371	-1.49296	-2.59679	-2.61804	-2.95004	-2.67829	-1.77144	-2.3016
A_23_P101392	1.29863	0.442315	0.388912	0.835917	1.14534	-0.112422	-0.28858	-1.13721	0.417181	-0.603386
A_23_P1014	1.2496	-1.41507	0.0136795	0.368314	-0.811146	-1.26169	1.70313	0.717816	0.0777883	1.1353
A_23_P101407	2.91066	2.49446	0.291731	2.89981	2.48273	2.87487	2.88624	2.43954	2.1538	2.52434
A_23_P101427	-1.24958	-0.696177	-0.641891	-1.32709	-1.35174	-1.79184	-1.48713	-1.57348	-1.25526	-0.927022
A_23_P101434	-0.294449	-0.28198	-0.128219	-0.160741	-0.338328	-0.0149703	-0.328941	-0.0722068	-0.634657	-0.0854226
A_23_P101461	-1.76853	-0.703697	-1.24525	-1.65837	-1.03193	-2.15555	-2.94252	-2.04499	-1.14676	-2.22909
A_23_P101476	0.036324	-0.00618857	0.185457	0.416079	0.347766	0.0320193	0.0281623	0.369574	0.324936	-0.217516
A_23_P101480	-0.342361	-0.0553541	-0.61212	-0.381548	-2.27904	-1.34915	-1.7287	-0.0736858	-0.646525	-1.44575
A_23_P101505	2.75503	2.98455	2.89419	0.826473	1.91024	-2.54532	2.8256	2.98076	0.608088	-2.1112
A_23_P101516	-2.04807	-0.596916	-0.168754	-0.572669	-2.6756	-1.99468	-1.95869	-2.12782	-1.65565	-1.45469
A_23_P101521	0.344651	1.34744	0.460758	0.483559	0.740422	1.38679	0.875998	1.2299	0.818735	0.827747
A_23_P101532	3.03509	2.22565	1.56696	0.496709	2.20915	2.44357	1.77667	2.1253	1.33631	0.220546
A_23_P101551	1.57001	0.352362	0.0722189	0.941776	-1.50046	1.15012	-0.456765	-1.3872	-1.01587	-1.16346
A_23_P10156	-0.254109	-0.607707	-0.127641	-0.251769	-0.48415	-0.23906	-1.26761	-0.592616	-0.885867	-0.475134
A_23_P101564	-0.540376	-0.301009	-0.257359	-0.0851672	-0.830906	-0.798436	-0.426322	-0.91382	-0.823629	-0.464488
A_23_P101573	-0.631889	-0.473806	-0.307801	-0.605564	-0.345398	-0.551808	-0.641104	-1.05117	-0.117252	-0.423345
A_23_P101615	1.22817	-0.994553	-0.535047	0.884177	1.20421	-0.212271	-0.332654	-0.51977	0.561893	0.15143
A_23_P101623	-0.433553	-0.132156	-0.273854	-0.389699	-0.0614493	-0.43381	0.288027	-0.647313	-0.608048	-0.606887
A_23_P101636	-0.153229	-0.290933	0.480476	0.0465466	0.598503	0.350134	-0.145418	0.448559	0.284958	-0.114194
A_23_P101642	2.87253	3.00646	3.07268	3.04942	3.70446	2.25006	2.08295	2.08437	2.14193	2.583
A_23_P101655	-0.261802	-0.432136	-0.506724	-0.486533	-0.625622	-0.933823	-0.643655	-0.798473	-0.647815	-0.995204
A_23_P101671	1.15145	1.36011	0.779312	0.685223	0.539716	0.971979	1.41731	0.730127	0.371003	0.801205
A_23_P101683	0.0162722	-0.15776	-0.07933	-0.493248	-0.771974	-0.00366807	-0.169515	-0.572906	-0.770115	-0.204722
A_23_P101699	-0.537539	-0.0739598	-0.0876839	-0.510756	-0.868042	-0.298772	-0.765163	-0.553342	-0.293749	-0.431701
A_23_P101707	2.1909	1.93233	0.502645	0.473025	0.831004	-1.13388	1.09821	0.286419	-0.90641	0.751417
A_23_P10172	-0.320117	0.178806	-0.377701	-0.614455	0.0426756	-0.962701	-0.508382	-0.414912	-0.958619	-0.301544
A_23_P101737	0.0479878	-0.214403	0.500988	0.186256	0.34297	0.569276	0.237615	0.0407914	-0.853983	-0.181242
A_23_P101742	-0.671393	-0.107843	-0.172487	-0.969592	-1.65399	-0.958282	-0.84626	-1.31258	-1.04946	-0.836933
A_23_P101759	-0.695613	-0.00691122	-1.34924	-0.71643	-0.612762	-0.836735	-0.911439	-0.920285	-1.03193	-0.798505
A_23_P101761	-1.65654	-1.17098	-1.19294	-1.88682	-3.34891	-2.56389	-2.83064	-2.93771	-2.53555	-2.69053
A_23_P101774	-0.24918	0.0171642	0.0545103	-0.0966107	-1.75085	-1.36373	-1.43478	-1.10963	-1.05351	-0.932247
A_23_P101783	-1.23512	-0.421073	-0.723989	-1.297	-1.39811	-1.47594	-1.23555	-1.6211	-1.0413	-0.848156
A_23_P101796	-0.700154	-0.0365157	-0.436638	-0.211249	-0.365957	-0.645899	-0.421368	-1.23174	-0.328505	-0.252707
A_23_P101806	-1.49542	-0.686283	-3.698	-1.2546	-1.65569	-0.546224	-2.12139	-2.00783	-1.22075	-1.26787
A_23_P101811	-0.193923	-0.433758	-0.271306	0.225547	-0.448485	-0.197085	-0.0393512	0.0106634	-0.711748	0.145895
A_23_P10182	-0.267809	1.42744	-2.04336	0.42225	-0.868184	2.37904	-0.312306	1.46832	0.44109	-3.46143
A_23_P101829	-0.62574	-0.202691	0.0147946	-0.335742	-0.678922	-0.374572	0.241617	-0.00491033	0.321538	0.253421
A_23_P101871	0.365299	0.827814	0.264228	0.597566	0.343294	0.11327	0.548742	0.402317	3.84321	0.721137
A_23_P101893	-1.3525	-0.556582	-0.786362	-1.00055	-1.67256	-1.77058	-1.75271	-1.72308	-1.6933	-1.27403
A_23_P101905	3.20467	2.9072	1.64585	1.67934	2.30214	2.65803	2.42019	2.2987	3.35894	1.4009
A_23_P101908	-0.44557	-0.252755	-0.0813871	-0.362332	0.0386809	-0.318854	-0.40365	-0.316149	0.24766	0.10749
A_23_P10194	0.3046	0.897439	3.76501	-0.00455751	-0.616861	-0.540695	-0.796561	3.23554	-1.10966	-1.9698
A_23_P101943	-1.61195	-0.710253	-0.928057	-0.684247	-2.10728	-1.61177	-1.52264	-1.44837	-1.37235	-1.11399
A_23_P101950	1.01919	0.240535	0.544344	2.08827	2.35367	1.71856	1.43545	2.32612	1.66184	2.26485
A_23_P101960	-0.687651	-0.443045	-1.82899	-1.68544	-1.6772	-0.876428	-0.877004	-0.327377	-0.820598	-2.63128
A_23_P101972	-4.02869	-2.59743	-5.13969	-0.268384	-1.9339	-0.215762	-4.29912	-2.25826	-5.64559	-5.37381
A_23_P101992	0.0144459	-2.87906	-0.0759596	-0.447635	-0.317266	-4.36203	-0.588812	-1.02438	-0.487782	-2.50643
A_23_P102000	-0.14823	-0.0631221	1.06278	0.228833	2.47885	0.401125	-0.511589	1.53687	0.450256	2.11472
A_23_P102017	-0.183852	0.362377	-0.343191	0.212278	-0.242341	0.257149	-0.550423	-0.518272	-0.62821	-0.744302
A_23_P102037	0.121951	-1.23231	1.3738	-0.128411	-0.404158	-1.01268	-0.590841	0.144677	-1.14244	0.153348
A_23_P102058	0.520811	-0.158038	0.424025	0.472885	-1.14128	-0.264048	0.983617	-0.632151	-1.02198	-0.950021
A_23_P10206	0.471519	1.07459	0.730673	0.748407	0.1819	1.61959	0.0589074	0.416088	0.471991	0.523651
A_23_P102060	0.64791	0.756286	-2.01809	0.627991	2.11571	1.54448	0.640526	2.46911	1.09302	0.826551
A_23_P102071	0.657823	0.786159	0.611267	0.789112	0.355332	1.08401	1.22818	1.83169	0.520192	0.629424
A_23_P102083	-0.467744	0.34561	0.0560244	0.056615	-0.67251	-0.0712699	-0.112437	-0.502206	0.230571	-0.0230775
A_23_P102109	2.78913	3.15199	0.907459	0.431845	3.39999	-0.33781	-0.00452066	1.40296	2.76736	0.282611
A_23_P10211	0.0419498	0.0160604	0.147976	0.0698269	1.09287	0.356197	0.0545403	0.588399	0.604858	0.450291
A_23_P102113	-2.71266	-1.25475	-0.627437	-0.963426	-2.37686	-2.23011	-2.26887	-2.32832	-1.85544	-1.46934
A_23_P102117	-0.617389	-0.403156	-0.554279	-0.610909	-0.934741	-1.20777	-1.08679	-0.912619	-0.761394	-0.7216
A_23_P102122	1.08487	0.709926	-0.141786	-0.127805	0.777639	-0.199386	0.327787	0.838736	0.260771	0.624128
A_23_P102160	-1.47938	-1.52333	-0.838047	1.10135	-0.880821	0.537499	0.673873	0.286921	0.287717	0.769442
A_23_P102172	-0.603227	-0.508764	0.173201	-0.249589	0.325491	-1.28722	-0.482054	-0.515428	-0.0231987	-0.3493
A_23_P102183	2.16446	1.20745	1.54919	2.16753	0.695206	0.891431	2.55315	-0.35557	0.294571	1.14242
A_23_P102192	-0.0765062	0.0109147	-0.421273	-0.547359	0.57981	-0.2967	-0.458216	-0.526896	-0.489726	-0.541045
A_23_P102202	1.74404	0.646798	1.04845	1.67352	2.37989	1.0255	1.2484	1.38802	1.35741	2.38078
A_23_P102235	1.59867	0.715892	1.52665	1.73367	1.72346	0.371328	0.973506	1.22314	1.06078	1.42107
A_23_P102242	0.343866	0.466739	0.251689	0.663962	0.772146	0.392295	0.512033	-0.125826	0.373079	0.479405
A_23_P102258	0.662336	-0.471316	-0.402555	-0.593991	-0.156522	0.0157033	0.670934	-0.0723154	0.042335	0.152118
A_23_P102262	1.45262	0.242135	1.02666	1.22654	2.36188	1.66161	1.23701	1.6942	0.946986	1.77956
A_23_P102278	-0.503977	-0.394002	-0.27591	-0.128121	-0.292722	0.0295814	-0.526179	-0.394602	-0.506841	-0.135703
A_23_P102286	-0.00875664	-0.842383	-0.0686341	-0.550096	-0.335665	0.05352	-0.823451	-0.412582	-1.0002	-0.292519
A_23_P10232	0.248395	-0.72119	-0.450832	-2.99713	0.61636	0.10185	0.196935	0.353982	1.3587	0.450743
A_23_P102320	0.328249	0.0431299	0.420435	1.44629	-0.166809	-0.0651812	-0.0983169	0.391881	0.596815	0.569716
A_23_P102331	0.275788	-0.562885	-0.073234	1.22698	0.135624	0.492931	-0.574473	-0.0393089	0.278924	-0.140592
A_23_P102351	-0.165793	0.499165	-0.133609	-0.416421	-0.595146	-0.563915	-0.0117113	-0.822443	-0.51943	-0.458375
A_23_P102364	1.69481	1.15997	0.934282	1.79761	1.32033	1.14014	1.34102	1.9066	1.60146	0.814689
A_23_P102391	-1.43887	-0.381602	-1.66068	-0.973031	-0.782621	1.85009	0.126166	0.894493	-3.98924	-3.59826
A_23_P102404	1.97677	1.63103	1.88723	1.83	2.82719	2.46984	2.30515	2.03505	1.6499	2.15349
A_23_P102412	-0.122943	-0.0913907	0.0605127	1.32275	-0.235443	1.11312	0.847532	0.862157	0.226919	0.468736
A_23_P102420	2.51385	1.43063	1.56782	2.29534	2.98201	2.90995	2.84471	3.23554	2.32843	3.01195
A_23_P102439	-0.63193	-0.275947	-0.453489	-1.057	-1.26769	-1.4395	-1.71038	-1.68682	-1.62086	-0.916287
A_23_P102454	2.46464	1.59883	2.36872	3.42984	2.62576	1.53184	2.31122	2.71573	2.26717	3.36228
A_23_P102462	-0.932655	-0.538052	-0.437681	-1.33638	-2.11289	-1.20381	-1.31108	-1.21987	-1.28538	-1.54393
A_23_P102471	2.24978	0.394066	1.09771	1.71329	4.00831	2.9366	2.62308	3.10238	2.15978	3.21447
A_23_P102481	-1.2514	-0.707064	-1.02476	-1.46907	-2.59099	-1.74898	-2.20386	-2.20705	-1.72633	-1.86956
A_23_P102494	-0.391192	-0.194372	-1.03913	-0.705014	-2.58082	-0.331968	-0.78853	-2.38375	-2.39295	-1.97667
A_23_P102508	1.14932	0.869223	1.09997	0.407996	2.01543	1.8742	1.00904	0.957856	-0.0861223	0.033407
A_23_P102517	2.72239	1.11708	1.44366	3.66899	2.23363	2.32962	1.44567	4.60107	0.762428	1.6881
A_23_P102523	-0.376647	0.195646	-0.353828	-0.10259	0.839327	0.186154	-0.620285	0.195592	0.0266667	-0.308277
A_23_P102542	-0.368577	-1.60951	-1.24393	-0.553486	0.0544772	0.416725	-0.711575	-1.02869	-0.205761	0.63581
A_23_P102551	0.159662	0.149262	0.0484414	-0.8835	0.657546	0.132707	-0.715398	-0.039749	0.893171	-0.642945
A_23_P102571	-0.213649	-0.687456	-0.99454	-1.86935	-0.595029	-1.07042	-1.70185	-2.0109	-1.55209	-2.01737
A_23_P102575	0.280111	-0.265506	-0.945122	-1.22043	-0.765601	-0.185318	-0.946409	-0.684521	-0.848961	-1.32539
A_23_P102582	2.16836	0.739354	1.70986	1.25238	1.72882	1.03843	1.22846	0.629551	0.426326	0.595775
A_23_P102607	-0.0105516	-0.130247	0.302839	0.272446	0.446098	0.676063	0.18272	0.966006	1.51067	0.243495
A_23_P102611	1.7046	-0.824979	0.823524	3.49468	1.20606	4.14868	1.1579	1.37666	3.61282	2.02123
A_23_P102622	-0.733868	-0.175515	-0.167159	-0.275681	-2.32021	-2.25453	-2.09671	-2.03384	-1.27821	-0.982672
A_23_P102634	-0.280763	0.0705521	-0.315954	0.751539	-1.21853	-0.493409	0.441419	-0.926791	-0.0308911	-0.583825
A_23_P102681	0.770104	0.810383	1.57857	0.221514	0.417449	-1.52946	0.175564	-1.42695	-0.736823	-0.335885
A_23_P102694	-2.65362	-1.11539	-1.26202	-1.53055	-2.75436	-2.27786	-2.1174	-2.08567	-1.57743	-1.52031
A_23_P102706	-1.45079	-0.73976	-1.23455	-1.00483	-1.37482	-1.12407	-1.17338	-1.12148	-0.492308	-0.805382
A_23_P102731	0.773925	1.15624	2.03999	0.944021	2.37741	-1.3331	2.42828	1.26441	1.70143	1.23465
A_23_P102743	-0.114174	-0.253455	0.19293	-0.08173	1.08507	-0.166739	-0.369272	0.0806269	-0.20516	-0.0174926
A_23_P102759	0.425527	0.668455	0.217382	-0.0331733	0.163052	-0.0467865	0.127731	-0.355286	0.0580046	0.168506
A_23_P102769	0.975111	-0.978195	0.294896	-0.141373	1.02461	0.69595	1.98928	1.82058	1.07686	0.744171
A_23_P102770	1.49165	0.336307	0.829941	1.31697	1.92114	1.35392	1.49673	1.50156	1.38625	1.34765
A_23_P102816	-0.295903	0.220541	0.0796142	-0.234339	-1.80235	-1.22715	-1.50669	-1.58991	-0.990966	-0.689119
A_23_P102832	1.89035	1.23825	1.15049	0.785767	1.54476	0.392972	0.018345	-0.636455	0.917596	0.766182
A_23_P102842	1.36863	0.273785	0.504755	0.863637	2.33035	2.58554	1.26796	0.2901	2.07381	1.21625
A_23_P102864	0.359401	0.594303	0.887573	0.536982	1.33491	0.0790027	0.45579	0.993861	0.613708	1.10258
A_23_P102876	2.48105	1.79032	2.27812	2.16662	2.72116	2.12067	2.57087	2.46962	2.68424	2.90245
A_23_P102884	0.238389	-0.0292572	0.195906	0.323197	2.14309	0.907286	0.835754	0.904293	1.23542	0.468149
A_23_P102890	1.06553	0.438524	1.19996	1.34661	2.36803	1.38614	1.11798	2.37181	1.61364	2.60641
A_23_P1029	-0.661815	-0.63203	-0.050662	-0.684446	-0.808108	-0.550475	-1.45457	-1.00301	-0.766383	-0.638405
A_23_P10291	-1.3081	0.475964	0.230459	-0.934924	0.145218	0.59835	0.194812	0.442688	-0.302045	0.124508
A_23_P102917	-0.0861418	-0.607596	-0.0530721	0.0169651	-0.912447	-0.61559	-0.390479	-0.437364	-0.0617069	-0.344371
A_23_P102919	-0.434145	0.39768	-0.270025	-0.127924	-0.0414845	-0.827125	-0.450688	-0.811283	-0.275735	-0.323782
A_23_P102925	0.429138	-0.075366	0.358347	0.562363	-0.013528	0.211229	0.551459	0.382504	-0.0517705	0.223131
A_23_P102937	1.30069	0.433763	1.14924	1.60515	1.77335	1.35169	1.98176	0.962398	1.38732	1.39288
A_23_P102950	-1.53085	-1.17029	-2.82561	-1.86481	-2.72432	-0.844295	-3.31516	-3.69957	-3.22678	-0.944826
A_23_P102965	-1.32583	-0.0444822	0.386934	0.885425	0.124936	-0.235324	0.137881	0.19612	-0.511796	0.554455
A_23_P102973	-0.299534	0.263231	-0.608376	-1.11401	-0.00111708	0.467867	0.193853	0.0714316	-0.465357	-0.047926
A_23_P102988	-0.683542	-0.39023	-0.298313	-0.710391	0.148285	-1.16788	-0.276649	-0.59583	-0.109522	-0.708689
A_23_P102994	1.05544	0.778114	0.371299	0.303904	0.324545	0.0451423	-0.175234	-0.457824	-0.113904	1.13556
A_23_P103011	0.758488	0.310426	0.642738	-1.33551	-0.872447	-0.161256	-2.34884	1.57917	-0.1368	-0.310967
A_23_P103034	-0.48628	0.548344	-0.0758165	-0.734926	-0.719109	-0.49643	-0.483835	-0.932558	0.516133	-0.193614
A_23_P103041	-2.30854	0.0825836	-0.347019	-0.262861	-0.94629	-0.237235	-0.759686	-0.853739	-0.936335	-0.837376
A_23_P10305	0.346289	-0.31758	0.10178	-0.486957	0.284169	-0.126104	-0.251965	-0.19437	-1.08711	0.10081
A_23_P103062	0.0561465	-0.171524	0.0406123	-0.0876691	-0.188392	0.0464834	-0.713518	-0.517953	-0.418507	-0.411435
A_23_P103070	1.42845	0.240025	-0.0189092	0.262901	1.36413	0.54907	0.853307	1.10379	1.2511	0.970362
A_23_P103084	-0.294296	-0.12139	-0.126873	-0.396663	-0.167471	-0.780539	-0.580088	-0.262695	-1.20257	-0.451453
A_23_P103099	-0.0674303	-0.213123	-0.315839	-0.761853	-1.12067	-0.651535	-0.00298391	-0.0904983	-0.564551	-0.0457973
A_23_P103104	0.186742	-0.0479677	-0.239626	0.557127	0.15663	0.543464	-0.274868	0.166616	0.158076	0.95056
A_23_P103110	0.536243	0.815637	0.570895	0.302819	0.601032	1.51856	0.75751	0.90648	0.667426	0.431763
A_23_P103120	0.305183	0.962367	-0.0995808	0.326349	-1.02557	-0.2753	-0.854051	-0.0422905	0.198426	0.502278
A_23_P103131	0.120334	0.767174	1.0814	0.0838184	0.503967	0.906532	0.586796	0.322001	1.32044	0.405891
A_23_P103149	-0.0472269	-0.7397	-0.157841	0.464361	0.992207	0.315688	-0.982042	0.619533	0.320206	0.798574
A_23_P103172	1.58259	0.136546	1.1786	0.814847	1.26295	1.55563	0.857263	2.62366	0.803091	0.214806
A_23_P103180	2.43254	1.1303	0.383883	1.16952	1.99837	1.32529	2.09604	1.37291	2.55964	1.41079
A_23_P103201	0.331584	-0.296777	0.441268	-0.00443139	1.49417	1.03543	1.19562	1.20896	0.813985	0.835301
A_23_P103226	-0.00385125	-0.739919	0.0916278	-0.192166	-0.588168	-0.753323	-0.121315	0.475256	-0.23659	-0.0432954
A_23_P103232	-1.30305	-1.69541	-2.653	-1.03031	0.0880305	-1.13767	-1.2877	-1.9486	-1.15039	-1.98952
A_23_P103248	0.493843	-0.93238	-0.783281	0.116219	0.318696	-0.367438	0.639916	-0.33044	-0.813601	-0.328199
A_23_P103256	-0.12454	0.456398	-0.0675389	0.372125	-0.089724	-0.154558	-0.409139	-0.18882	-0.434764	-0.248395
A_23_P103269	0.0425086	0.0497699	-0.489238	-0.182689	-0.4657	-0.655288	-0.445871	-0.413791	-0.278085	-0.136813
A_23_P103276	0.607029	0.203297	0.739501	0.720748	1.38993	0.502951	0.854932	1.20643	0.425497	1
A_23_P103282	0.486842	-0.843268	-1.76767	1.24671	0.762068	1.36097	1.50946	1.24206	0.617052	-0.132121
A_23_P103310	-0.11062	-0.166511	0.330453	-0.252265	-0.499705	0.302425	0.402765	0.802264	-11.3455	-0.375046
A_23_P103315	-1.50999	-0.837646	-0.763647	-2.21376	-1.49009	-1.19142	-0.924502	-0.943759	-1.17094	-1.47613
A_23_P103328	-0.674209	0.0794931	-0.711583	-0.0707355	-0.00473656	0.788064	-0.753686	-0.237363	-1.24891	-0.453357
A_23_P103334	-0.212536	0.286481	0.0575685	-0.427317	-0.874839	-1.60114	-0.872232	-1.37253	0.298127	-0.101117
A_23_P103349	-0.155756	0.135512	-1.98865	-0.478885	-0.253471	-0.397901	-0.914278	-1.07565	-0.504151	-0.160403
A_23_P103361	1.66659	1.96798	1.80473	1.73259	-0.663551	1.18775	0.981712	0.953738	1.23131	0.700876
A_23_P103371	0.082836	-0.0811791	-0.0308981	-0.311951	0.455138	-0.0238106	-1.25449	0.106756	-0.809792	0.191351
A_23_P103398	-0.58418	-1.29897	-1.64918	0.242465	0.208804	0.62239	-0.0778205	-1.73928	-0.68004	-0.938339
A_23_P103405	0.67464	0.0518417	0.112671	0.0804192	-1.60685	-0.901669	0.811197	0.170546	-0.0643519	-0.0611287
A_23_P103414	0.342626	-0.291447	0.340469	0.905269	1.80574	1.67041	0.962747	1.05345	0.483495	0.969294
A_23_P103424	-0.211873	-0.325404	-0.214342	-1.02632	-0.259536	-0.0483219	-0.863437	-0.289969	-0.401666	-0.914322
A_23_P103433	-1.66215	-1.33426	-2.24846	-1.94067	-0.806084	0.298809	-1.02166	-1.40978	-0.371389	-1.60789
A_23_P103442	-0.605689	-0.588161	-0.715853	-0.500984	1.00459	1.5959	0.904858	0.114252	-0.0534298	-0.944587
A_23_P103454	0.552923	-0.651527	-1.63393	0.160191	0.841728	0.918903	0.776068	0.00876066	-0.0789567	0.522439
A_23_P103465	-1.5183	-1.17737	-0.29769	-0.0685555	-1.95559	0.0275269	0.303143	0.626703	-0.0227736	0.28851
A_23_P103476	0.23557	0.726879	0.0746201	0.613697	1.05922	0.427605	0.0777964	-0.314508	-0.698502	0.282482
A_23_P103486	-2.25997	-0.797772	-1.1125	-2.00879	-0.647506	-0.0689712	-0.776013	-0.0690715	-0.201661	-0.0277128
A_23_P103496	0.285379	-0.356746	-0.361753	0.162623	-0.802079	-0.224862	-0.451702	0.0197051	0.830586	0.143275
A_23_P103503	0.292479	-1.46455	-0.29511	0.578528	0.624671	1.08713	-0.225797	-0.0824408	0.347425	1.76283
A_23_P103511	-0.257134	-0.45941	-0.706708	1.9459	1.16895	0.262707	-0.173298	-2.76225	-1.74952	0.0276865
A_23_P103522	-0.694938	-0.644755	-0.295572	-0.945116	-1.13451	-0.192838	-0.466415	-0.912925	0.349819	-0.852843
A_23_P103532	-0.125885	0.252658	-0.150701	0.0294296	-1.83038	-0.792415	-0.642449	-0.783091	-0.582504	-0.903168
A_23_P10356	-0.0246505	-0.104953	-0.0505144	-0.402914	-0.570565	-0.4757	-0.472388	0.0665297	-0.0659673	0.127485
A_23_P103561	-1.73847	-1.99685	-2.43273	-2.67086	-1.57706	-1.2485	-2.30922	-1.39046	-1.16991	-1.16958
A_23_P103571	-0.0492258	0.404872	0.104496	-0.651554	0.838304	1.09242	0.331487	0.701761	0.00200972	-0.146966
A_23_P103588	-0.049596	0.102833	-0.602993	-0.0484345	-0.461373	0.253509	-0.126435	0.0014294	-0.733114	-0.19993
A_23_P103601	-1.50526	-2.89124	-2.52069	1.91167	-1.38223	-1.07229	-1.754	0.0273203	0.513813	0.434757
A_23_P103617	1.43294	-1.27106	-2.89866	-2.19884	-4.47337	1.74107	-1.91802	-4.95276	-3.52319	-0.874182
A_23_P103628	2.19215	1.08412	1.59747	2.55276	2.68385	1.91122	2.18489	1.4354	1.44007	1.33249
A_23_P103631	1.53357	0.874116	0.904096	1.03374	1.94413	2.14195	1.2724	1.26619	1.0474	-0.0908957
A_23_P103661	1.60514	1.09068	-0.470447	-0.0246515	1.35266	0.744386	0.562162	0.00606459	0.246736	-0.00207009
A_23_P103672	-0.268746	0.433714	0.63363	0.380159	0.296931	0.0535572	0.919884	0.228872	0.333327	0.266522
A_23_P103690	-0.249944	0.156818	-0.103042	-0.894391	-0.535084	-0.479349	-0.202385	-0.304321	-0.0801962	-0.554533
A_23_P103698	2.37046	0.53068	-0.0935896	0.0598946	1.20489	-0.390441	0.267938	-0.720415	-1.11581	-0.631334
A_23_P103703	-0.13893	1.25363	-0.137534	-0.113546	0.18725	-0.0512002	0.18689	-0.43082	0.00319534	-0.00820963
A_23_P103720	2.99258	3.99171	2.53889	4.04013	2.57628	2.44462	3.95701	4.61931	2.62726	2.5322
A_23_P10374	-0.296192	-0.651848	-0.884952	-0.576407	-0.196388	-0.114747	-0.198138	-0.341444	0.39218	0.0891188
A_23_P103743	-0.2701	-0.107231	-0.0520699	0.116154	0.311247	-0.0846687	-0.460606	-0.443298	-0.658997	-0.076181
A_23_P103756	0.0695863	-0.274898	-0.90481	-0.229286	-1.04333	0.450499	-0.20801	-0.895341	-0.357562	0.463793
A_23_P103765	0.118359	-0.0539768	-1.13053	-0.360798	0.277406	-0.549204	-0.772727	-0.151311	0.0831575	-0.0798061
A_23_P103775	0.690397	0.325512	0.690785	0.632886	0.575092	0.830829	0.0630475	0.237608	1.37982	1.00159
A_23_P103787	0.981054	0.339848	0.267211	0.115591	1.1601	0.740828	0.969041	1.45374	0.335339	0.617212
A_23_P103795	1.31877	-0.578572	0.10964	0.649543	1.99475	0.986407	0.791926	0.45765	0.212692	1.31316
A_23_P1038	-0.0826271	-0.388667	-0.422341	-0.910554	-0.357072	0.0654165	-0.0274165	0.0485523	0.13449	0.289731
A_23_P103803	-0.0183572	0.0262919	0.322069	-0.486049	-0.125449	-0.186138	-0.62426	1.08954	-0.626865	0.076578
A_23_P103812	0.747592	1.0221	0.117787	0.906499	1.3518	0.939957	1.95897	1.60801	1.91632	1.2755
A_23_P103824	-1.19541	-0.874918	-1.02912	1.09	-1.20887	-1.19651	-1.38131	-2.4018	-1.32963	-2.22849
A_23_P103837	-1.03927	-0.774269	-0.590338	-1.56423	-2.5003	-1.49865	-1.63636	-1.55171	-1.4266	-1.78688
A_23_P10385	3.38741	0.223783	1.54068	2.4054	6.57233	2.02707	2.27004	2.43391	2.31409	2.78994
A_23_P103864	0.249141	-0.0304741	-1.11882	0.703043	0.540102	0.797529	0.517795	0.432082	2.36149	1.44821
A_23_P103877	1.96519	2.37838	2.09141	2.43868	2.23581	2.044	1.54645	2.12097	2.60818	3.01571
A_23_P103885	1.20064	0.113547	0.09601	-0.66858	1.61202	1.91403	-0.341064	0.756244	-0.181651	0.0932022
A_23_P103897	-0.90589	-0.40039	-0.262583	-0.407594	-0.729179	-0.552806	0.242589	-0.865761	0.145376	-0.56324
A_23_P103905	1.38409	0.681588	0.190065	0.276133	1.76718	0.581116	0.616704	0.452308	0.557391	0.0618397
A_23_P10391	-1.42742	-1.81153	-0.676989	1.52669	-0.0594598	-1.84958	-1.93313	-0.854986	0.898533	-0.42289
A_23_P103919	0.31616	0.304673	-0.104662	0.024273	1.12661	1.02254	0.976709	0.557267	0.249247	0.069418
A_23_P103923	0.325182	0.306994	-0.0666127	-1.03724	0.570519	0.64693	1.32763	1.10247	-0.149059	-0.743626
A_23_P103932	-2.07956	-3.66381	-4.22512	-1.91795	-2.50859	-2.22125	-1.51431	-1.76376	-2.19681	-2.29379
A_23_P103942	-0.432124	0.459546	0.200611	-0.977271	0.630151	-0.230979	-1.57285	-0.321304	-0.583897	-0.33021
A_23_P103951	1.04279	0.793118	0.848802	0.812001	0.24848	0.694861	0.884773	0.500515	0.264242	0.725649
A_23_P103968	0.285109	-0.688826	-0.075963	-0.0884257	-0.00844723	0.010773	-0.0620937	0.0276781	-1.27248	0.0975283
A_23_P103971	-0.993185	-5.39877	-9.90528	-9.48532	-0.535535	0.401087	-9.65569	-0.283209	-8.42635	-9.677
A_23_P103981	-1.0564	-3.50787	-2.43518	-1.53262	-4.67849	-4.20561	-2.90276	-2.64696	-1.57433	-0.898048
A_23_P103996	0.806372	0.617308	0.628012	0.831293	1.32277	0.443704	1.51942	1.58805	0.73239	0.698383
A_23_P10401	0.0569214	0.102717	0.233466	0.341408	-0.00536556	-3.02359	0.181631	-0.466103	-2.01951	-0.911326
A_23_P104012	-0.134871	-0.0638763	0.14545	-0.108771	-0.122413	-0.520176	1.12623	0.584588	0.792756	0.222782
A_23_P104022	1.368	-0.920614	-0.663162	0.756089	1.42741	0.741063	0.771754	0.178432	0.697196	0.830444
A_23_P104025	1.05621	0.0927124	0.13902	0.315705	1.86675	2.39927	1.38963	0.693264	1.58803	0.272667
A_23_P104046	0.394792	-0.450206	0.259525	0.818661	0.994848	0.405822	0.206398	0.858097	0.676695	0.6453
A_23_P104054	-0.735419	-1.82084	-2.0717	-1.55355	0.139898	0.904067	-0.82812	-0.300136	-0.185333	0.410603
A_23_P104065	1.43946	0.212232	0.71339	0.793293	2.81826	0.356414	1.14517	1.44079	1.30176	1.13471
A_23_P104073	0.0452594	-0.713734	-0.292394	-0.834396	-0.292715	1.07606	-0.0363879	-0.474934	0.0840003	0.427392
A_23_P104086	-0.62161	-0.209552	-0.474035	-0.758291	-0.89428	-1.09128	-1.44745	-0.971494	-1.1535	-0.898521
A_23_P104098	-0.381377	-0.130224	-0.354327	-0.456141	-1.01338	-0.568326	-1.04235	-0.908532	-0.628499	-0.753763
A_23_P104109	2.08662	-0.324988	0.217171	0.66869	3.36764	2.18158	2.03859	1.88375	0.997238	2.3271
A_23_P104116	1.50389	0.910641	0.778055	0.710414	2.14893	0.894892	1.61599	1.38356	1.11098	0.0918308
A_23_P104138	0.503349	1.227	-0.101886	-0.14846	0.0637394	0.566566	-0.186097	-0.602406	-0.0907344	-0.850146
A_23_P104146	0.0304678	-0.320294	-0.322672	0.319088	-0.231862	0.107299	0.518669	0.10839	0.197663	-0.491977
A_23_P104151	2.15914	1.29779	0.782147	0.972869	1.14048	0.998378	1.03151	2.13372	0.396937	0.644205
A_23_P104188	0.206643	-0.0567274	0.0711438	0.150406	-0.499461	0.0114211	-0.0826209	-0.121422	-0.140201	-1.06895
A_23_P104193	-0.0530677	0.438757	-1.04436	-0.355165	-0.00758934	0.612147	0.556226	-0.0549759	0.963709	-0.0297679
A_23_P104199	0.363058	-0.369295	0.36761	-0.169917	-0.431656	0.0174415	-0.0310338	0.0572753	0.515262	-0.3503
A_23_P104201	0.561362	0.774502	0.655754	0.689583	1.77014	1.00322	1.61738	1.76905	0.704396	1.08357
A_23_P104224	0.490884	1.14507	0.998637	0.438111	1.2016	1.04311	1.52306	1.39393	2.45348	2.23932
A_23_P104237	-0.649665	-0.121447	-0.00461501	-0.205752	0.946164	0.350048	-0.887022	-0.408726	0.625569	-0.313247
A_23_P104252	-1.0356	0.878028	0.814115	1.18933	0.708594	1.48978	1.98713	1.43784	0.538836	-0.69143
A_23_P104275	0.322687	-0.195192	-0.053411	-0.500405	0.22001	-0.319866	0.0902702	-0.115173	-0.345091	-0.172508
A_23_P104282	0.198031	0.388296	0.0902566	0.360827	-0.145114	0.371807	-0.295712	0.683716	-0.131811	0.461867
A_23_P104295	-0.822372	-0.157337	-0.19373	-0.607856	0.384067	-0.440257	-0.567851	-0.935462	1.27589	0.578942
A_23_P1043	0.974571	1.64927	0.936615	1.39543	1.06095	1.51809	1.3135	1.85072	0.649975	0.218629
A_23_P104318	0.287044	1.15301	0.593492	0.954043	0.783087	-0.166122	0.53049	0.548518	0.401474	0.964429
A_23_P104323	-0.131366	0.195497	-0.0784637	-0.610181	0.00344882	-0.0344835	0.125404	0.137157	0.215044	-0.0956603
A_23_P104335	-1.11398	0.809256	-0.402661	0.427348	0.470295	-1.35604	-1.4078	-0.176879	0.475428	-0.890721
A_23_P104346	-0.283001	0.278104	0.169968	0.30619	-0.250769	-0.463309	-0.942368	0.512416	-0.129937	-0.386209
A_23_P104351	0.523322	-0.0756255	-0.661287	-0.38189	-0.980989	0.31343	1.12278	-0.765707	0.0601253	-0.0717833
A_23_P104362	2.45742	1.22289	0.391384	0.757023	1.93116	0.977316	1.43845	1.37216	0.0378964	1.26719
A_23_P104372	1.27146	0.343059	0.90007	-0.363123	2.45255	1.42216	1.3951	1.77443	0.0111251	0.952389
A_23_P104387	-0.126172	0.110917	0.154854	1.33356	-1.01647	-0.586959	-0.0601266	-0.178276	-0.752278	-1.00292
A_23_P104413	-2.09959	-1.64086	-1.70897	-2.5772	-2.92545	-2.56531	-2.50525	-2.77562	-2.62616	-2.49334
A_23_P10442	0.602207	-1.11043	-1.52789	-0.733449	-1.47843	-1.54022	0.119371	0.705379	0.604342	-1.50315
A_23_P104438	0.645794	1.71801	0.876456	0.86375	1.11106	1.44186	1.43311	1.17042	0.950213	0.796309
A_23_P104445	0.11305	0.219001	0.0155481	0.543508	0.500051	0.767242	0.608062	0.308456	-0.283424	-2.59283
A_23_P104451	-0.102225	-0.451176	0.0186234	1.15011	0.425142	0.567937	0.908612	0.891445	-0.14973	0.649745
A_23_P104464	-0.111692	-2.11735	-2.89388	-0.123405	-3.64329	-1.55068	-0.139054	-1.9521	-3.86836	-1.72013
A_23_P104471	1.12296	0.421636	0.611256	0.809095	0.593024	2.90612	1.0579	-1.39333	-1.87817	1.28544
A_23_P104484	-0.889279	-0.116344	-0.181898	-0.223256	-0.229418	-0.656277	-0.00089367	-0.0428379	-0.169915	-0.0430321
A_23_P104493	1.1846	0.828338	0.69466	0.515662	1.21546	0.940735	0.86347	2.60573	0.195561	-1.42715
A_23_P104509	-1.23981	-0.791717	-0.757095	-1.13536	-1.60142	-1.57214	-1.82423	-1.47336	-1.0883	-1.01572
A_23_P104522	-0.773118	-1.84913	-0.779654	-2.14967	-1.14503	0.0669936	0.498799	-2.63042	-0.671763	-0.751619
A_23_P104555	-0.832788	-0.0707615	-0.286506	-0.794099	-0.442321	-0.737717	-0.531061	-0.602383	-1.03452	-0.52283
A_23_P104563	-0.809505	0.749275	1.0179	-0.456743	0.139081	1.84931	0.694321	1.1604	-0.290378	0.11038
A_23_P104579	-0.682912	-0.297697	-0.157478	-0.908226	-0.45227	-0.495125	-0.897257	-1.00468	-0.761457	-0.374157
A_23_P10458	-0.000526254	-0.164301	-0.0753896	-0.177353	-0.24031	-0.257373	-0.209255	-0.182775	-0.274387	-0.296421
A_23_P104583	-0.700989	-0.2249	-0.457379	-0.711282	-0.613145	-0.5158	-0.699081	-0.562293	-0.276357	-0.261893
A_23_P104594	-0.84891	-0.352798	-0.626264	-0.771355	-0.235695	-1.89008	-1.2389	-1.09968	-0.923962	-0.774814
A_23_P104607	0.446488	-0.288205	0.260613	0.338953	-0.0937868	0.301922	0.101083	0.282481	-0.116635	0.114666
A_23_P104617	-1.21527	-0.471125	-0.768508	-1.77475	-1.26002	-1.2797	-1.31591	-1.37114	-0.846643	-1.96947
A_23_P104624	0.864862	0.861429	-0.839004	2.5877	0.616968	-0.377384	0.567962	1.72596	-1.04277	-0.50169
A_23_P10463	1.29311	-0.439439	-0.107481	0.327331	2.20878	1.89614	0.784339	1.02289	0.780412	-1.01842
A_23_P104641	0.316219	0.761674	-0.0855848	-1.02999	0.366855	0.115562	0.133999	-0.48796	-0.436704	-1.09544
A_23_P104651	3.86151	1.96233	3.27743	0.142742	5.59493	1.65764	1.34814	2.9757	1.8679	2.9113
A_23_P104676	1.86469	0.814817	1.04687	1.03017	2.6493	2.07987	1.71626	2.16179	1.35863	1.38821
A_23_P104689	0.935314	0.603097	0.688134	0.5127	0.742914	1.00379	1.11742	1.07285	0.164875	0.844132
A_23_P104692	0.24249	0.234707	-1.57555	-0.0713203	1.2435	0.347857	1.01379	-1.57545	0.84116	-0.0912082
A_23_P104705	-0.230221	-0.346565	-0.37729	-0.272709	-0.191952	-0.868112	-0.274839	-0.374632	-0.519579	-0.279534
A_23_P104734	1.84786	0.834861	0.56134	0.067867	1.10501	1.46698	1.37306	0.97789	0.575371	1.33309
A_23_P104741	-0.389319	0.627233	1.03671	-1.27976	0.136132	-0.418841	0.933005	0.878423	0.637505	0.565229
A_23_P104762	-0.213178	0.103805	-0.329345	-0.294879	0.210673	-0.24842	0.0764458	-0.226597	-0.782937	0.673808
A_23_P104798	0.580373	0.379181	1.12651	0.256391	0.96184	0.536279	0.39965	0.772611	-0.199623	0.146759
A_23_P104804	-0.488294	-0.754968	-0.539798	-1.30304	0.515508	-0.845327	-0.048619	-0.878372	-0.543523	-1.78728
A_23_P104819	-0.338429	-0.406445	-0.443496	-0.477759	-0.212832	-0.78763	-0.190916	-0.327478	-0.294078	-0.74409
A_23_P104845	-0.702204	-0.702918	-0.357718	-0.927151	-0.390625	-1.24719	-1.40268	-0.58677	-0.613068	-1.13583
A_23_P104853	-0.57217	-0.416495	0.364767	-0.057634	0.525297	-0.107897	0.166968	-0.18252	0.593531	-1.26991
A_23_P104865	-3.48981	-2.09698	-0.708402	-2.95875	-0.769818	-1.45601	-0.123172	-0.275245	-0.280972	-0.463078
A_23_P104876	1.37427	-0.120125	-0.0841689	0.235705	2.48223	0.340406	3.54579	0.294518	-0.0784016	0.398157
A_23_P10488	-1.60211	-2.17723	-0.840096	-2.81706	-3.78506	-0.50023	-1.74791	-0.70886	-1.66331	-1.0903
A_23_P104881	-1.14617	-0.146851	-0.0522607	-0.303768	-0.810143	-0.64107	0.0498141	-1.05236	-0.149838	-0.388805
A_23_P104892	2.61028	1.48402	0.84597	1.62785	2.92511	2.50959	2.37062	1.70149	1.43662	1.47589
A_23_P104942	1.81267	1.0376	0.539636	-0.408479	0.128187	0.0228177	0.555692	0.652471	-0.610259	0.374791
A_23_P10497	-0.41062	-0.952042	-1.20487	-0.729342	-0.788137	-0.676442	-1.38581	-0.682644	-0.91928	-0.0578606
A_23_P104972	-0.462404	-0.11279	-0.247413	-0.180859	-1.50272	-1.04416	-0.536031	-1.04243	-0.552038	-0.417283
A_23_P104996	0.0801837	0.111409	0.830339	0.289495	-0.31173	0.5017	0.0999163	1.18165	0.840651	-0.889441
A_23_P10500	-0.272934	-0.169883	0.0683499	0.0787848	-0.142438	0.557009	-0.616747	-0.240202	-0.612473	-0.133951
A_23_P105002	-1.69074	-1.39704	-1.5134	-2.78031	-0.0356032	-0.307408	0.659482	-0.169185	-0.416652	1.23657
A_23_P105012	-0.464434	-2.7784	-2.61627	-3.3591	-2.26174	0.620115	-2.41738	-2.41452	-3.47048	-2.80459
A_23_P105028	1.25671	0.836134	1.48537	0.718261	1.80306	-0.551643	0.321487	0.875526	0.186181	-0.334827
A_23_P105044	0.36261	-0.588316	-1.12683	-1.3242	-0.891397	0.558731	0.625728	-0.142222	-1.67533	-1.83886
A_23_P10506	-0.664767	-3.39578	-3.45108	-1.3053	-1.87015	-0.500601	-1.80837	-1.51049	-0.660772	-1.40742
A_23_P105066	0.395082	0.862902	0.118165	0.181267	0.423348	0.0285364	0.361788	0.867966	0.580003	0.2421
A_23_P105088	-0.587856	-0.530258	-0.459735	-0.725936	-0.399778	-0.476463	-0.809878	-1.04028	-0.846002	-0.336502
A_23_P105118	0.230562	0.0675866	-0.838629	-0.225432	-0.0724019	-0.944789	-1.12214	0.435624	-0.372678	-0.640864
A_23_P105138	1.51702	1.4272	0.169574	1.34822	1.37361	-0.542837	2.77722	0.727898	0.954447	0.358404
A_23_P105144	1.23157	2.01687	-4.90611	-0.695663	-4.68874	2.56269	2.17499	-3.91082	-5.21296	0.550766
A_23_P10518	0.493001	0.122467	1.05424	-0.0898501	-0.735158	-0.690318	-0.813758	-0.934231	-0.558134	-0.412412
A_23_P105184	-0.534811	-0.273311	-1.57927	-1.66832	-1.35142	-0.453941	-1.63996	-1.11714	-1.2613	-0.847649
A_23_P105197	-0.729651	0.091488	-0.504931	-0.513641	-0.496374	-1.31625	-0.114756	-0.298802	-1.31513	-0.457976
A_23_P105212	0.323488	0.628857	-1.72664	-2.51047	-0.0621405	-0.0258259	-4.50969	-5.34602	-8.29758	-7.14068
A_23_P105227	0.0222138	0.578117	-0.344649	-0.607137	0.146886	0.535597	-0.0277945	0.0810546	-0.46635	-0.209254
A_23_P10525	-0.912329	-0.24007	-0.310734	-0.81147	-0.265238	-1.05822	-0.423027	-0.930907	0.312465	-0.767316
A_23_P105251	-0.451918	-0.089007	0.0662302	0.762363	0.0127082	0.274687	-0.233219	0.158362	0.775966	0.670237
A_23_P105264	0.335515	0.882132	0.233532	0.158197	0.0355639	-0.241949	-0.632941	0.553289	-0.866219	-0.274313
A_23_P105276	0.750827	-0.167304	0.723985	0.686897	1.8825	2.49353	1.42301	1.67038	1.49899	0.873583
A_23_P105307	-0.00171349	0.0479761	-0.0532136	-0.0279257	0.0089287	0.0280588	-0.361239	0.40488	1.22769	0.175497
A_23_P105313	1.1294	-0.18008	0.0209202	-0.0563807	1.72851	2.48547	1.47163	1.60183	2.33756	0.984952
A_23_P105368	-0.0697038	0.791432	0.774509	-0.0267935	-1.36849	-0.151011	-0.475894	-0.163763	0.147712	0.0124617
A_23_P105382	0.423039	-0.729358	-0.116488	0.555072	0.566464	0.640099	0.132741	1.29729	0.928547	0.723131
A_23_P105392	1.96574	0.620519	2.1661	1.35745	2.80066	1.67284	1.50774	1.64689	1.34134	1.95539
A_23_P105409	0.43952	-0.258901	-0.0789028	-0.117882	-0.527463	0.571497	-0.368317	0.367349	0.0138969	0.208763
A_23_P10542	-0.377678	-0.371894	-0.277264	-0.496345	-0.472202	-0.864471	-0.148489	-1.12125	0.0437499	-0.318861
A_23_P105423	-0.180791	0.273957	0.0847922	-0.403467	0.80157	0.547767	1.76625	0.127165	0.624909	0.013407
A_23_P105436	0.225158	-0.648022	0.0641455	0.416996	0.881129	-1.05398	0.913867	-0.441059	-1.21518	0.164369
A_23_P105442	-2.41253	-1.03326	-0.518879	-0.778333	-2.27337	-1.96994	-1.94409	-1.97211	-1.53247	-1.41875
A_23_P105453	0.117623	-0.0212826	-0.187147	0.089896	-0.545953	-2.49221	-0.716367	-0.420101	-0.684916	-1.03037
A_23_P105461	-0.222461	0.114258	-0.297266	0.016226	0.989911	0.545651	0.261815	0.0522456	-0.26701	-0.105189
A_23_P105465	-0.304261	0.290389	-0.818839	-0.396531	-0.609607	-0.457747	1.31521	-0.320178	-0.93571	-0.311585
A_23_P105475	0.865141	1.23728	0.20871	0.173825	0.559323	0.65687	1.58233	0.311608	0.618893	0.599649
A_23_P105495	0.208785	-0.370625	-0.335247	-1.13088	-0.429197	-0.214413	0.733541	-0.0330141	0.395961	-0.441448
A_23_P105519	2.1267	1.92036	1.8059	2.16105	3.44406	2.00885	1.88061	2.18114	1.23764	1.62485
A_23_P105524	-0.397115	-0.230492	0.4378	-0.304749	-0.521305	-0.491594	-0.314125	-0.256413	-0.154414	0.333706
A_23_P105535	1.01312	0.00436127	0.221135	0.618628	1.07285	0.819507	0.633655	0.76026	0.0774307	0.983888
A_23_P105545	-0.0697513	0.472572	0.0589564	0.54759	0.900971	-0.105691	-0.69577	0.00363301	-0.624739	0.425941
A_23_P105562	-3.09045	-2.80529	-2.79814	-3.14219	-3.01386	-2.63111	-3.27198	-2.37255	-2.63249	-2.83501
A_23_P105571	0.708196	0.897534	0.721191	0.756375	1.20546	0.331711	0.195581	0.701825	0.235242	0.486583
A_23_P105583	-0.165716	0.860023	0.522619	-0.273923	-0.269154	-0.855467	0.578065	0.906353	-0.142754	-0.466501
A_23_P10559	-0.537427	0.725729	0.0272659	0.42683	0.455595	-0.447078	0.344229	0.0524288	0.286638	0.544508
A_23_P105592	-1.2138	-0.600848	0.754772	-2.76718	0.239199	0.8912	-1.63093	-0.572622	0.421329	0.710024
A_23_P1056	-2.19734	-0.690872	-0.404091	-0.27966	-3.18951	-2.58794	-2.47124	-2.49264	-2.04292	-1.28676
A_23_P10561	-0.31587	-0.335793	-0.347384	-0.651513	-0.782246	0.0220989	-0.383492	-0.182321	0.0663223	-0.196781
A_23_P105619	1.47611	0.11444	0.302906	0.519905	-0.610064	1.83672	-0.120547	0.934974	0.297328	0.386831
A_23_P105625	1.61325	-0.605373	0.101597	0.468661	0.828675	1.76609	1.06883	0.904209	1.51306	1.44744
A_23_P10564	-0.0936644	0.372164	0.632632	0.120337	-1.15041	0.519235	0.061238	-0.0755033	0.842552	-0.614045
A_23_P105646	1.69342	1.35506	1.12766	1.90962	1.59983	0.40941	1.55131	0.649796	3.10072	1.44223
A_23_P105651	0.168623	0.539561	0.077872	0.893996	0.447645	-0.143421	-0.34253	1.03636	0.175156	0.122352
A_23_P105664	0.790365	0.16286	0.703892	0.239679	1.22041	0.366149	0.667235	0.694641	0.6282	0.99145
A_23_P105691	-0.528511	-0.982395	-0.63673	-1.13496	-2.46032	-1.56322	-2.73345	-2.50467	-1.25048	-1.35781
A_23_P105705	-0.173845	-0.278429	-0.0304081	-0.177359	0.212068	0.158937	-0.141944	0.8507	0.108137	-0.185685
A_23_P105730	-0.223592	0.401929	0.289794	0.521305	-0.400534	0.971608	-0.367658	0.00176099	0.276216	0.0821763
A_23_P105732	0.021427	0.636208	0.550953	0.160593	0.192926	0.301273	-0.0953855	-0.286686	0.10051	0.0489326
A_23_P105747	-0.0533293	-0.256869	0.0300386	-0.130698	-1.17749	0.0754061	0.276948	-0.547299	0.167722	-0.706183
A_23_P105753	0.515858	-0.293622	0.340336	0.761818	0.519233	0.799728	0.094923	-0.185107	1.34951	1.04912
A_23_P105794	-0.236363	0.484433	0.00758862	0.230985	-0.664645	-0.0966169	-0.201723	-0.268847	-0.664483	-0.373466
A_23_P105803	0.45295	0.461078	0.565047	1.17341	0.725285	0.818785	1.41464	1.18459	1.58805	0.342085
A_23_P105815	-0.0532673	0.494369	0.174183	0.271234	0.0585929	0.937969	-0.187227	-0.118399	0.594527	-0.246327
A_23_P105833	1.19326	0.939794	0.590211	1.50478	1.12645	2.09827	2.86763	2.21259	1.49954	1.23476
A_23_P105856	0.00164937	-0.0214521	-0.0838653	0.334465	-0.545049	-0.191206	-0.438625	-0.273475	-0.0831	0.852089
A_23_P105862	-4.15635	-2.14591	-3.27115	-1.91983	-2.57294	0.277807	1.30481	-0.215023	-0.935551	-1.6185
A_23_P105873	-1.25172	-0.839719	-0.987823	-0.515126	-0.464662	-0.738338	-0.596046	-1.00278	0.893719	-0.0807063
A_23_P105886	0.214787	0.272079	-0.276111	-0.0488546	0.0238491	0.327745	0.137472	0.0673611	-0.280781	-0.12551
A_23_P105900	4.01339	2.26411	2.16099	3.09575	2.28043	2.23195	1.91651	2.13247	2.26476	1.50066
A_23_P10591	-0.154539	-1.19331	0.0703528	-0.304983	-1.31154	-0.877365	-0.17583	-1.49878	0.501165	0.877381
A_23_P105923	-0.536333	-0.835845	-0.140284	-0.457965	-0.223258	-0.27242	-0.909802	-0.00359989	-0.98923	-0.439637
A_23_P105939	-0.408416	-0.249959	-0.323113	-0.549092	-0.933659	-0.0791209	-0.747002	-0.308665	-0.358402	-0.512335
A_23_P105957	-0.370786	-0.758311	-0.452914	-0.218566	-0.97518	-1.08487	-1.00787	0.0230949	-1.26455	-1.21512
A_23_P105963	-0.15774	0.0731538	0.242182	0.395057	-0.313475	0.198421	1.09565	-0.550951	-0.290419	-0.272594
A_23_P105973	0.986307	-0.0177215	-0.408827	0.842818	0.839584	1.41064	2.84477	2.40254	1.71414	1.13606
A_23_P106	-1.05155	0.399773	-0.459085	0.0481949	-0.962958	-0.816214	-0.872538	0.50881	-1.58139	-0.00488771
A_23_P106002	-0.738523	-0.780841	-0.479694	-0.037786	0.525533	1.71189	1.2402	0.173885	1.01478	-0.74087
A_23_P106016	0.05996	0.351052	0.575844	0.583885	2.73375	0.77308	0.43451	1.63413	2.85209	1.26247
A_23_P106024	-1.2715	-0.713344	-0.990477	-1.12964	-1.85148	-1.79452	-1.20507	-1.68299	-1.22761	-0.997174
A_23_P106042	-0.217594	-0.212333	-0.141812	-0.386862	-0.787558	-3.87607	-0.242194	-0.387218	-0.915969	-0.381863
A_23_P10605	0.121421	-0.288641	-0.0437574	-0.314595	1.44114	0.615537	0.618701	0.303273	1.79334	0.0761095
A_23_P106056	0.28499	-0.0375027	0.210724	1.22564	0.121139	0.484218	-0.250729	-0.125874	-0.272615	0.0861387
A_23_P106069	0.347922	0.319583	0.0137555	-0.0811469	-0.292594	0.214422	0.71309	0.912903	0.234694	0.1914
A_23_P106080	-0.428009	-0.560972	-0.0927076	-0.687752	-0.701317	-0.887256	0.249088	-0.0055236	-0.307768	-0.732454
A_23_P106103	1.22203	-0.578946	1.35396	-0.917729	0.329162	-1.269	-0.107018	-0.64024	-1.76978	-0.635788
A_23_P106117	-1.20288	-0.0860038	-0.327988	-0.525379	-1.70105	-1.57176	-1.43736	-1.60085	-1.23584	-0.682332
A_23_P106127	-0.270451	-0.682229	0.0678592	1.57353	1.34177	0.726015	-0.740179	1.06084	0.165911	0.464104
A_23_P106131	1.19509	-0.171727	-0.122733	0.884278	-0.454189	1.06906	0.317852	0.531887	0.401421	-0.357277
A_23_P10614	1.15965	1.15155	0.919496	1.01022	1.3587	1.52736	1.5252	1.29948	3.16378	1.90542
A_23_P106145	3.91497	2.27422	2.84485	4.55307	3.87939	2.86001	2.80191	3.35219	2.8923	3.2055
A_23_P106158	-0.324079	0.127859	0.0120012	0.0924832	0.424685	0.349877	0.890217	0.0765429	1.00631	0.562638
A_23_P106162	-0.634388	-0.418542	-0.568909	-0.614916	-0.461412	-0.360809	-0.579087	-0.493164	-0.622639	-0.877441
A_23_P106174	-0.130701	0.574252	-0.202431	-0.00184194	-0.610834	-0.736367	-0.148336	-0.176521	0.126657	-0.200361
A_23_P106194	-0.0578017	0.0477983	0.35661	0.590826	0.451521	-0.110207	-0.313914	-0.371203	-0.22478	-0.0346732
A_23_P106204	1.28619	0.845965	0.455068	0.717242	1.02932	0.654732	0.83781	0.905952	0.751051	0.667022
A_23_P106226	-0.585293	-0.086432	0.0692231	0.839485	-0.3735	-0.640422	1.11372	-0.0855448	0.147899	0.0349241
A_23_P106236	0.175169	-0.508738	0.46214	-0.425559	-0.552416	-0.0081284	-1.19404	-1.04493	-0.77324	-0.616212
A_23_P106241	0.221957	-0.701826	-0.22146	-0.950871	0.666879	0.364899	1.0974	1.29149	-0.117342	0.223733
A_23_P106258	-1.77283	-0.975131	-1.19985	-1.73423	-1.81326	-1.91448	-1.99673	-2.0797	-1.76358	-1.61747
A_23_P106280	1.1324	0.535918	-0.105419	1.84817	0.787212	1.98359	2.3642	2.29774	1.95455	1.19502
A_23_P106299	0.638558	-0.799702	-1.3262	-1.59234	-0.851528	1.1944	0.34494	-0.0754336	-2.29538	-1.84733
A_23_P106322	-1.14261	-0.0228272	0.135981	0.0528708	-2.9283	-2.28532	-2.29998	-2.36037	-1.65416	-1.20371
A_23_P106362	-0.330688	-1.70116	-0.514297	0.564571	0.448534	-1.67259	-1.06671	-0.762338	0.463522	-0.937069
A_23_P106371	-0.150801	-0.0733496	-0.445193	0.167385	-0.218225	-0.142883	-0.656166	0.164224	-0.4278	-0.195442
A_23_P106389	1.25041	0.92453	0.272719	0.294691	0.656597	0.340357	0.362254	0.104122	1.67917	0.600376
A_23_P106391	-0.474273	-0.0355512	0.169325	0.574822	-0.0455655	1.19991	1.83514	0.646079	1.00721	0.00580433
A_23_P10640	-0.922346	-0.721078	-0.542143	-0.84936	-1.3495	-1.38212	-1.04543	-0.737472	-1.09889	-1.34866
A_23_P106405	0.190777	0.140481	0.982196	1.45047	0.175515	0.802981	0.406544	0.772942	0.282086	0.511522
A_23_P106412	-1.68688	-0.489624	-3.50043	-0.664445	0.409664	2.09018	0.597852	1.6863	1.47237	1.65939
A_23_P106425	0.1322	-0.406613	-0.31467	-0.34482	-0.127735	0.00161636	-0.719063	0.0957917	-0.208664	-0.1901
A_23_P106433	1.67191	1.50486	2.15409	1.52294	2.43755	1.53576	1.66334	1.52264	2.46685	1.58942
A_23_P106439	-0.0391211	0.47811	0.315961	-0.253441	-0.350966	-0.63131	-0.496582	-0.214188	-0.467237	-0.418727
A_23_P106463	1.786	0.480239	0.583196	1.79392	1.8392	1.91541	2.62783	1.90397	1.47397	0.962897
A_23_P10647	1.33824	1.48245	1.51357	1.76405	2.13077	1.54478	3.38944	1.99922	2.23967	1.12602
A_23_P106472	-1.41139	-0.811271	-1.63397	-1.71769	-2.39862	-2.10606	-2.35471	-2.58986	-2.25906	-2.0992
A_23_P106481	3.32611	3.20899	1.49976	2.14994	2.71237	1.25881	1.58877	1.84024	1.31914	0.728671
A_23_P106497	0.260414	0.757108	0.390404	0.174276	1.02242	0.250134	2.19651	0.775201	0.296741	0.947296
A_23_P106505	0.90697	0.304648	-0.236183	-0.260542	1.39474	1.11904	1.28462	2.07307	0.0807625	0.371169
A_23_P106522	-0.623999	-0.0327164	-0.323903	0.0776594	-0.735009	0.278236	-0.52843	-0.327386	-0.695302	-0.523982
A_23_P106532	-0.613255	0.139351	-0.219804	1.01421	0.895857	0.954943	0.755495	1.43638	0.532097	0.966033
A_23_P106544	2.03822	1.12896	3.14915	2.09061	3.25478	1.25141	2.14637	1.68331	2.47496	2.86321
A_23_P106559	-1.26718	-0.763024	-1.12494	-1.55539	-1.42699	-1.50639	-1.6888	-2.01967	-1.7393	-1.54511
A_23_P106562	-0.254995	-0.201529	-0.168352	-0.233711	-0.709476	-0.437879	-0.549593	-0.593909	-0.653556	-0.680534
A_23_P106575	3.37604	1.45746	2.79915	1.22032	2.09558	2.95592	1.78724	1.48616	2.27057	1.90278
A_23_P106602	-0.199224	-0.093707	-2.37664	-0.191456	-1.00436	-0.243307	-0.11301	-0.581615	-0.0271688	-0.461752
A_23_P106617	1.46122	2.04398	2.0993	1.42195	2.02119	1.62943	1.38442	2.53135	2.67603	2.60531
A_23_P106629	-1.56606	-0.967802	-0.569354	-2.08975	-0.141798	-1.09253	-0.459391	-1.13298	-0.534905	-0.606204
A_23_P106633	0.762975	-0.0830804	1.2688	0.496891	2.14921	2.03072	1.5543	0.630473	1.7201	0.856254
A_23_P106656	-0.231589	0.168103	-0.261015	-0.103043	0.103271	0.0724896	0.0728436	0.0398744	-0.828547	-0.520629
A_23_P106661	-1.99557	-2.01102	0.195693	-1.59426	-1.34401	1.27818	0.00695561	-1.67681	0.564261	-0.498267
A_23_P106663	0.293116	-1.55772	-0.206037	-0.812174	1.44105	-0.121855	-0.582021	0.0288523	-0.599186	-0.832887
A_23_P106675	-0.0820609	0.367064	0.0712613	0.193827	0.61326	0.356205	-0.0300028	0.274426	0.654062	0.317412
A_23_P106682	1.05167	-0.870155	-0.83203	-1.68783	-0.891748	0.508673	-0.848288	-1.09858	-1.44856	-3.74003
A_23_P106694	-1.18216	-0.604628	-0.195373	-1.97303	-0.616526	-0.713123	-1.01333	-1.61515	-0.478191	-0.89304
A_23_P106708	4.24897	4.34687	3.67955	2.2187	4.04451	3.95135	3.02383	2.98737	2.21397	2.44971
A_23_P106720	-0.61723	-0.177438	-0.113661	-0.574855	-0.758758	-0.588183	-0.67808	-0.766371	-1.33091	-0.513862
A_23_P106727	-0.168711	0.0230595	-0.458869	-0.455257	0.0713032	0.479505	-0.99474	-0.980526	-0.527094	-0.537525
A_23_P106737	-0.548869	-0.243526	-0.47555	-0.338867	-0.474636	-0.104911	0.139774	-0.420451	0.184479	-0.671345
A_23_P106741	1.38997	0.141268	1.11785	0.365232	1.27942	1.14136	1.14724	0.287577	1.08141	1.33206
A_23_P106761	-0.15151	0.154813	-0.527539	-0.517368	-0.383494	0.463679	-0.474067	-0.366041	-0.196807	-0.583148
A_23_P106773	-0.989127	1.83608	-1.15443	1.62567	0.0869719	1.91441	-0.906264	0.81671	0.00245033	-0.258857
A_23_P106798	0.623633	-0.342459	-0.586705	-0.239227	0.866744	0.627716	0.96168	0.835571	0.0453514	0.528115
A_23_P106806	-0.632118	-0.166942	-0.192385	-0.172292	-1.04339	-0.14772	-0.150881	-0.687118	-0.42971	-0.567304
A_23_P106814	-1.27189	-3.77693	-3.90297	-1.51717	-3.71505	-0.643641	-2.98228	-2.15309	-3.92866	-3.77225
A_23_P106822	2.11045	2.34064	2.31287	1.65098	1.03799	1.66186	1.93562	2.18796	1.9432	1.86373
A_23_P106835	1.20014	-0.245119	0.509748	0.464022	2.58663	1.06849	1.79437	0.393198	2.66399	2.48412
A_23_P106844	2.62016	0.0281285	2.17203	-0.209248	1.96721	1.5812	2.25869	2.81947	0.780036	1.27476
A_23_P10685	-1.85387	-1.78546	-0.436619	-3.72467	-2.27836	-1.74076	-2.29393	-2.91557	-1.04473	-1.97089
A_23_P106859	0.932928	1.20174	1.7546	0.458862	1.60849	1.07967	1.19081	0.742482	1.28445	1.57038
A_23_P106874	0.400796	0.475349	-0.0051385	0.667216	1.53863	1.08654	1.72558	1.44992	1.57771	0.581912
A_23_P106887	0.307467	-0.47588	0.209421	0.00158598	-0.258916	-0.574226	0.831492	-0.02333	0.105988	-0.239539
A_23_P106898	-0.272129	-0.107358	-0.182932	-0.103792	-0.488658	-0.025135	-0.58423	-0.0143902	-1.36813	-0.0905802
A_23_P106906	0.136828	0.432096	-0.0108445	-0.0569817	-0.631697	0.819602	2.74371	2.27976	0.716121	-0.243707
A_23_P106922	2.6896	1.00564	2.75471	2.53449	1.68099	1.03553	1.84274	1.8854	4.47401	1.76146
A_23_P106933	-0.103042	1.364	-1.24237	-0.485395	0.460287	0.1931	-0.258756	0.743806	0.155905	-0.0505531
A_23_P106945	-0.270442	-0.15612	-0.198167	-0.482402	0.563695	-0.804187	0.365207	-0.522569	-0.52091	-0.251472
A_23_P106973	0.212284	0.524383	-0.208921	-0.406961	1.09106	1.63604	0.853831	0.3654	1.3006	1.21124
A_23_P10699	-0.855083	-0.316632	-0.309968	-0.402772	-0.962332	-0.659083	0.016475	-0.494209	-0.594838	-0.202422
A_23_P106998	0.0652576	0.684119	0.489707	0.112187	-0.395067	-0.0290102	1.32374	-0.348543	0.231282	0.558211
A_23_P10701	-3.51592	-3.11187	-2.32649	-0.517182	-1.45335	0.0916878	-1.18739	-3.11581	-1.01339	-1.02275
A_23_P107036	2.04105	1.21748	0.509283	0.489812	1.22101	2.06955	1.12945	0.0835774	0.833426	0.636195
A_23_P107048	-0.444372	-0.187932	-0.777355	-0.947017	-0.810557	-0.804381	-1.03946	-1.21387	-0.968233	-0.932616
A_23_P107051	-2.34416	-0.495771	-1.3284	-3.22292	-1.18117	-1.00936	-3.03959	-1.54102	-0.277541	-1.04496
A_23_P107064	-0.722846	-0.466235	-0.653989	-0.770664	-0.810669	-1.031	-1.14231	-0.897131	-1.13764	-0.769274
A_23_P107073	1.63699	0.704163	0.659145	1.29073	1.93954	1.40724	1.90825	2.33642	2.04664	2.06035
A_23_P107087	0.633653	1.37871	1.23629	2.06665	0.954411	3.38799	1.11031	2.26842	1.23745	1.57639
A_23_P107102	-0.101309	-0.798574	-0.318135	0.25434	-0.55399	-1.06955	0.801551	0.290654	-0.286173	-0.689942
A_23_P107116	0.107592	-0.0532672	0.787416	0.062578	-0.729392	0.185936	0.487172	-1.51002	0.281723	0.331285
A_23_P107132	-0.162382	-0.213894	-0.356053	-0.232164	-0.733193	0.314146	-0.555062	-0.663572	-0.128327	-0.439714
A_23_P107154	0.445589	0.410616	2.04723	2.58689	2.44962	2.17553	2.44168	0.628881	2.82318	2.85858
A_23_P107166	0.302846	0.696332	0.144319	0.245709	-0.159884	0.129841	0.850329	-0.862858	0.628476	0.658345
A_23_P107173	0.199748	0.0954575	-0.125298	-0.0456033	-0.4525	-0.780299	0.145921	0.276951	-0.206799	-0.52722
A_23_P1072	1.39914	0.899636	0.832739	-0.271256	1.97007	1.33243	1.55168	2.0762	1.09795	1.18606
A_23_P107206	-0.409648	-0.399306	-0.758992	0.0230922	-0.197809	-0.54893	-0.43846	0.0561391	0.147481	-0.269409
A_23_P10721	-0.14151	-0.0824842	-0.110494	-0.300923	-0.102225	-0.22986	-0.368405	-0.811248	-0.693601	0.0595631
A_23_P107211	-0.0513356	-0.386489	0.0399641	0.182019	0.187572	0.787817	-0.19192	0.335455	-0.32446	0.13603
A_23_P107214	-0.248703	-1.71495	-0.894167	-1.27312	-3.00025	-2.74521	-4.37353	-3.59023	-2.75075	-1.68729
A_23_P107238	-0.368908	-0.152615	-0.214589	0.344345	0.606625	0.688695	-0.520557	-0.647137	-1.13125	0.0766047
A_23_P107247	-0.339711	-0.316073	-0.227245	-0.645268	0.223305	0.0562988	-0.204449	-0.668892	-0.874104	-0.314189
A_23_P107257	-0.388104	0.325363	0.11545	0.707165	0.550829	-0.100834	-1.42503	-0.0784777	0.80986	0.231162
A_23_P107283	-1.54674	1.37264	-2.24884	-0.639397	-0.255486	-0.461208	-0.08559	-1.69903	-3.14101	-0.434031
A_23_P107295	0.598693	-0.263065	0.203359	0.779614	1.09352	1.21763	0.752059	0.769069	1.65989	1.6847
A_23_P107307	-0.410393	-0.109303	-0.610036	-1.00872	-0.850072	-0.704881	-0.896966	-0.73639	-0.881482	-0.662037
A_23_P107313	-0.6082	0.182954	0.420382	0.355101	-0.65783	0.160134	-0.390866	0.647131	0.032499	0.140255
A_23_P107322	-1.85761	-3.16891	-0.75066	-1.73643	-2.17747	-0.363063	-1.37745	-1.34172	-1.71757	-1.63613
A_23_P107336	-0.624729	0.157277	-0.123326	-1.05934	0.0772269	0.0459132	-0.471432	-0.314704	-0.461964	-0.34885
A_23_P107350	-0.23563	0.380671	0.0529501	-0.0643164	0.233464	0.0168836	-0.53034	-0.336758	-0.491378	-0.348546
A_23_P107351	-0.920161	0.463044	0.456565	2.49644	0.650301	2.08035	1.1732	3.20698	1.83352	2.14815
A_23_P107369	0.388739	-0.20319	-0.286608	0.317034	1.93132	1.85144	1.32366	2.1683	1.80963	1.49489
A_23_P107373	1.71839	0.315455	0.992917	1.03793	0.969739	0.886147	1.09685	0.573564	1.05108	1.50905
A_23_P107394	-1.83293	-1.12743	-1.24887	-2.49472	-2.69437	-2.4022	-2.61593	-2.59627	-2.39989	-2.38862
A_23_P107401	2.81513	1.75297	1.5752	2.84429	1.42407	0.338092	0.715157	0.110627	2.44458	1.22121
A_23_P107412	-0.597457	-1.03433	-2.04428	-2.26172	-0.729417	-0.46458	-1.43586	-1.87136	-0.117374	-1.75227
A_23_P107421	3.98722	0.445252	0.966063	-0.166949	5.64825	1.67082	0.996672	1.5115	2.00686	1.34504
A_23_P10743	-0.943208	-0.323504	-0.434591	-0.834402	-0.186841	-0.903223	-0.85465	-0.725345	0.347133	-0.105696
A_23_P107432	0.263657	-1.14953	-2.41263	-1.87927	-0.775711	0.635412	0.699303	1.21185	1.18647	0.962045
A_23_P107443	-0.140134	0.118803	0.243153	-0.0798279	-0.350952	0.197488	-0.26682	0.792736	-0.407524	0.126234
A_23_P107454	-0.471522	0.184884	0.152249	-0.936712	-2.41219	-0.65402	-0.389588	-0.731335	-0.578804	-0.156486
A_23_P107465	-1.51829	-1.9504	-0.737532	-1.1377	-5.31353	-2.93103	-1.45932	-3.82181	-1.15639	-1.08936
A_23_P107483	-0.630916	-0.363758	-0.43918	-0.324312	-0.16044	-0.589784	-0.554847	-0.941977	-0.648988	-0.421207
A_23_P107507	-0.321013	-0.48143	0.165621	0.699713	-0.326958	-0.14069	-0.55835	-1.09916	-0.712923	0.375099
A_23_P107513	0.00737967	0.562498	-0.0159822	-0.161269	-0.0206146	-0.287785	-0.373416	-0.663383	0.304685	-0.0185477
A_23_P10753	0.311412	0.400839	1.07491	0.311327	0.272701	0.637993	0.298903	-0.159052	0.718576	0.00285616
A_23_P107531	-0.166703	-0.409376	-0.360169	-0.22958	-0.646737	-0.138409	-0.553554	0.100161	-0.684961	-0.26426
A_23_P107552	1.42125	0.801227	0.718413	0.831526	0.51107	2.59863	5.16667	2.78656	1.27362	1.00874
A_23_P107565	-0.0447779	-0.292691	-0.226243	-0.150061	-0.859525	-0.159942	0.0105793	0.115312	0.490434	-0.523564
A_23_P107578	-0.303393	-0.228557	0.171279	-0.0668321	-0.483574	-0.0953017	0.0559809	-0.372228	0.299524	0.0898201
A_23_P107587	-0.533568	0.0316629	-0.0248514	-0.191845	-0.44891	-0.667763	-0.56455	-0.191409	0.00484668	0.197797
A_23_P107597	0.34019	0.107633	0.207824	-0.754076	0.236084	0.0230782	-0.279295	-0.155802	-0.696005	0.0804201
A_23_P107612	-0.148316	-0.119328	-0.0335484	-0.498923	-1.4949	0.196224	0.39774	0.93507	-0.29516	-1.27986
A_23_P107623	-0.347474	0.301895	-0.362121	-0.185829	-0.543048	-0.3064	0.113219	0.225741	-0.813168	-0.589034
A_23_P107644	1.14053	0.909487	1.88258	0.883569	2.67262	1.07456	2.34883	3.03339	2.64115	1.81864
A_23_P107653	0.351324	1.04307	0.502535	0.97559	2.33703	1.85366	2.36442	0.336085	1.33468	1.28624
A_23_P107661	-1.07167	-0.386272	-0.203124	-0.282857	-0.685854	-2.0059	-1.33865	-1.66351	-0.674958	-0.833927
A_23_P107673	-0.111899	0.633497	0.624334	-1.66465	0.861986	0.637643	0.452696	0.225978	1.57139	-0.0440742
A_23_P107684	-0.0313997	-0.330577	-0.335184	-2.38929	0.0739809	0.601314	-0.302444	-1.23001	-0.118696	-0.0262275
A_23_P107693	-0.250946	0.0597202	-0.179099	0.157986	-0.503498	-0.671716	-0.262529	-0.443191	0.0114063	0.249656
A_23_P107701	2.74707	2.54075	0.764678	1.26201	0.667837	0.599837	2.72962	1.0029	0.891734	-0.220623
A_23_P107714	-0.108429	0.239481	0.505086	0.224295	0.488875	0.826568	0.103011	-0.549474	0.277659	0.370232
A_23_P107724	-0.00106965	-0.42364	-0.346307	-0.413876	1.18046	1.42527	0.726859	0.208019	1.57019	1.30248
A_23_P107735	-2.43171	-0.822142	-0.83192	-2.74976	-2.27963	-2.18973	-2.08712	-1.92799	-1.57747	-1.42201
A_23_P107744	0.168853	0.216212	-0.0266561	-0.00449362	0.369418	-0.183255	-0.610927	0.959036	-0.260573	0.547953
A_23_P107750	0.00950296	0.53725	0.173827	0.913642	0.772934	0.536544	0.116449	-0.430884	-0.829342	-0.739725
A_23_P107763	0.843325	0.390443	-0.218132	0.20545	0.644423	0.577759	0.49879	1.14976	0.321937	1.12753
A_23_P107775	-0.999125	-0.132594	-0.358831	-0.428161	1.88965	-0.774052	-0.730196	-0.419493	-0.785891	-0.725344
A_23_P107795	0.699091	0.602852	0.521549	0.672878	-0.258607	-1.06419	-0.149694	-1.01783	-0.0602932	-0.86416
A_23_P107801	-0.159878	-0.878913	-1.81555	-3.1589	-1.37268	-0.821748	-1.26152	-2.77807	-0.716283	-2.0829
A_23_P107847	-0.238219	0.858262	-0.405241	-0.137166	0.0819252	-0.167439	-0.101891	-0.506527	-0.161537	-0.66501
A_23_P10785	0.958864	1.12588	0.630727	0.597314	1.31373	1.19915	0.144499	0.700026	0.658588	1.87817
A_23_P107855	-0.618774	-0.298231	-1.01397	-0.680105	-1.47802	-1.08752	-1.52374	-0.981729	-1.30346	-1.20387
A_23_P107881	0.254112	-0.17349	0.399716	-0.0773731	0.378793	0.481486	-0.00674752	0.433072	0.0633118	-0.300796
A_23_P107894	-0.325738	0.0843666	-0.119249	-0.505132	-0.0126265	-0.814313	-0.524423	-0.54702	-0.91668	-0.777165
A_23_P107903	-0.469302	0.40988	-0.647994	-0.00853524	1.35558	0.915636	1.33286	1.97007	1.03095	-0.884883
A_23_P107911	0.82319	0.702768	0.608204	0.0270934	1.68628	-5.94352	0.57361	1.01616	-0.475609	-5.56671
A_23_P107933	-0.46638	0.0593343	0.0206782	0.111865	-0.870245	-0.676084	-0.97531	-0.730568	-0.63569	-0.172236
A_23_P107942	1.86629	0.394111	0.63961	2.91108	1.11938	0.388255	2.17097	0.29518	0.927526	0.190839
A_23_P107959	0.258756	-0.615168	-0.842849	-3.2599	-0.864285	0.509668	-0.565721	-0.831482	-0.0703289	-0.530502
A_23_P107963	-3.59974	-3.15178	-2.16683	-2.23952	-4.85959	-3.48287	-3.31966	-3.603	-3.06001	-2.80599
A_23_P107974	-0.596112	-0.0852757	-0.424905	-0.329525	-0.869717	-0.796002	-1.34468	-0.736758	-0.931252	-0.709577
A_23_P10798	0.0496733	-0.0447435	-0.57611	-0.480402	-0.349785	-0.141486	0.510216	-0.940978	-0.911603	-0.361377
A_23_P107981	-0.0886141	0.140727	0.0187395	-0.188872	-0.019161	-0.00460952	-0.366167	-0.237075	-1.54891	-0.823605
A_23_P107994	-0.36383	-0.174066	-0.575076	-0.0261364	0.402582	-0.00656195	-0.459239	-0.577938	-0.345564	-0.41984
A_23_P108028	0.281468	0.593149	0.630596	0.790678	1.16861	0.621278	0.971519	1.44761	0.661653	0.324741
A_23_P108042	-0.237276	0.872772	-0.0664934	-0.0371403	0.321346	0.140023	0.576411	0.482053	0.365794	-0.913807
A_23_P108054	-0.871861	2.18749	2.03531	-0.416015	1.89561	1.91315	0.263069	0.748795	2.56213	2.02922
A_23_P108062	-0.731229	-0.824722	-0.248939	-0.987124	-2.38681	-1.21265	-2.06668	-1.5618	-1.38679	-2.01627
A_23_P108075	0.517506	-0.143818	0.143531	-0.022414	-0.376517	-1.15982	-0.27781	0.210124	0.391777	-0.343793
A_23_P108082	1.17651	1.55818	1.59883	1.91338	1.50436	1.11345	0.893088	1.52777	0.910926	1.58515
A_23_P108103	-0.26625	0.156772	0.0887581	-0.236221	-0.507886	-0.163486	0.0867536	0.0742437	-0.183951	-0.276229
A_23_P108129	0.0651753	-0.1183	-0.218087	0.358025	-0.771614	-0.503028	-0.161455	-0.13304	0.899754	-0.466645
A_23_P108135	-0.668592	0.695192	-2.23202	-4.28683	-2.18638	-0.186201	-2.60579	-2.13615	-1.16726	0.809613
A_23_P108143	0.951021	-0.531415	-1.44644	-1.16553	-0.872862	2.13533	-2.47252	-1.77761	-0.0394464	0.940577
A_23_P10815	0.273212	-0.508151	-0.206892	-0.109734	0.615964	1.40255	0.552018	1.40663	0.951028	0.711068
A_23_P108157	-0.406101	-0.206842	-0.222479	-0.70757	0.125489	-0.492085	-0.825739	-1.63148	-1.19136	-0.75776
A_23_P108170	0.652486	0.642312	0.74191	2.08266	2.10934	2.7973	1.17613	1.03358	2.1686	0.933627
A_23_P108180	-1.01477	-0.351878	-0.458451	-0.644398	-0.754826	-1.04178	-0.443065	-0.549578	-0.330572	-0.722764
A_23_P108200	-0.177815	-0.148265	-0.505496	-0.0412331	0.326124	-0.3295	-0.546468	-0.588854	0.312709	-0.253178
A_23_P108216	-0.394212	-0.0351016	-0.0125511	0.293177	-0.710789	-0.472484	-0.317289	-1.02081	-0.408624	-0.417256
A_23_P108221	-0.755583	-0.0772843	-0.456055	-0.297061	-0.129577	-0.807637	-1.19781	-1.22863	0.0844307	-0.443861
A_23_P108244	0.956341	-0.13308	-0.429382	0.125367	0.951896	0.339865	0.300399	-0.060934	0.525241	0.0188581
A_23_P108265	-0.389656	-0.0370061	0.132678	-0.0814888	0.434259	-0.0466902	-0.558005	-0.390503	-0.222662	-0.128114
A_23_P108280	-0.203591	-0.2173	-0.331466	-0.338968	0.0826067	-0.446082	-0.49776	0.224549	0.436087	-0.587402
A_23_P108294	-0.517033	-0.135756	-0.437316	-0.57975	0.459252	-0.582539	-0.0172671	-0.19102	0.421096	-0.0529012
A_23_P1083	-4.94854	-2.51673	-2.81451	-3.2781	-4.03632	-1.80031	-3.73884	-1.5254	-2.57507	-2.57705
A_23_P108303	0.371302	0.425232	-0.366614	-0.796139	-2.13386	-1.91315	-1.89968	-2.52033	-0.619926	0.375297
A_23_P108314	-2.65228	-0.592957	-0.215425	-0.45703	-1.34118	-1.10499	-0.718255	-1.37586	-1.13788	-0.563186
A_23_P108326	-0.668833	-1.52956	-0.504513	-0.542309	0.172098	-1.16493	-1.33857	-0.465306	-1.26261	-1.09728
A_23_P108331	-1.9041	-0.50661	-0.79305	-1.74811	-1.43377	-2.38471	-1.78352	-1.45463	-1.47861	-0.530088
A_23_P108342	0.427048	-1.2765	-0.116457	-0.082666	0.21587	0.843403	1.83949	0.462152	-0.130402	0.162839
A_23_P108376	1.5012	1.49517	0.310999	1.14655	0.751349	1.61272	1.29784	0.609788	0.602231	0.646299
A_23_P10839	-0.119661	1.12931	0.905338	1.16585	-1.04306	-1.1654	-0.366425	0.350668	-0.15255	-0.391266
A_23_P108394	-2.08951	-0.693216	-1.73797	-0.880457	-0.852388	1.15339	0.0184883	-0.25108	0.884637	0.320797
A_23_P108404	0.329225	0.475451	0.0339827	0.611003	-0.26034	0.488377	-0.327591	-0.155449	0.473633	-0.202204
A_23_P108415	1.37207	1.46127	1.43464	1.29618	0.751226	0.365181	1.14774	0.780695	0.939943	0.862987
A_23_P108427	1.62291	1.52906	-0.0395774	3.0747	1.90295	3.2803	1.655	3.95741	3.06396	3.32831
A_23_P108437	2.28154	2.33643	2.12454	4.00903	2.65473	3.08813	4.76388	3.55788	3.0108	3.98447
A_23_P108463	0.373823	-0.549169	1.0473	0.473647	2.86013	0.483653	1.51563	0.253823	0.273835	0.749221
A_23_P108492	-0.137115	0.0603013	0.0564192	-0.068149	-1.09599	0.16242	-0.510516	-0.182476	-0.627244	-0.596385
A_23_P108501	1.35249	1.48719	1.14451	-0.524426	1.11078	2.13233	1.50899	1.09619	-0.958443	1.47574
A_23_P108514	0.280305	0.302426	-0.0673795	-0.587508	-0.435106	0.414492	-0.012599	-0.220827	0.599861	0.113215
A_23_P108522	-0.914082	-1.32587	-1.30624	-0.615231	-0.986989	-0.732219	-1.30648	-1.88918	-1.40548	-1.60536
A_23_P108534	-0.159867	-0.805425	-0.232036	-0.342399	-0.664328	0.369161	0.173061	-0.183569	-0.0997782	-0.337591
A_23_P108546	-0.534939	0.201012	0.2505	0.468154	-0.0942965	0.0188556	0.817779	-0.0753788	-0.171604	-0.0461596
A_23_P108554	1.74499	0.295134	-0.0585461	1.83892	2.23256	2.2598	2.73973	2.43912	1.72777	1.67586
A_23_P108564	0.258887	0.335747	0.519938	0.403128	0.0966625	0.916843	0.780118	0.54104	0.220772	0.950959
A_23_P108574	0.731146	1.12902	1.00946	1.01052	1.8708	0.877158	0.904414	1.42222	1.24683	0.794458
A_23_P10858	0.3654	0.508604	0.279632	-0.093149	0.701652	0.0779097	0.781748	0.0955745	-0.394126	-0.125418
A_23_P108592	-0.265451	0.402185	0.646643	-0.611034	-0.0162511	-0.480346	-0.715835	-0.703518	-0.391099	0.165262
A_23_P108604	2.27635	1.84057	1.64582	1.83605	2.80358	1.52865	1.71793	2.21954	2.78131	1.92419
A_23_P108641	0.443303	0.484492	-0.0163499	0.469634	1.09693	0.856326	0.647521	0.754918	0.344591	0.740547
A_23_P108657	0.885494	0.0334715	-0.0532374	1.4459	0.133929	1.07654	1.71147	1.52915	0.686933	0.720756
A_23_P108662	0.503593	-0.066083	-1.40431	-1.20781	-0.21845	-0.10944	-1.53817	-1.03648	-1.04707	-1.02003
A_23_P108673	-0.217952	-0.0145092	0.51144	-0.998867	0.161267	0.611975	0.602977	0.992715	-0.314941	0.14289
A_23_P108699	0.262596	0.0612746	0.426562	0.135447	-0.10852	0.15378	0.101911	0.477344	-0.048896	-0.427639
A_23_P10870	1.39984	0.829672	0.0980494	-0.334118	2.75717	1.12234	2.29166	1.27594	0.312653	1.0603
A_23_P108708	1.12485	0.479902	0.738444	0.845547	-0.083428	0.360332	0.761012	-0.147625	0.16995	0.379066
A_23_P10873	0.0469071	-0.563377	-1.68308	0.19694	-0.526565	0.923066	0.901823	0.25675	0.343823	1.0597
A_23_P108734	-0.242531	-0.684902	0.00412295	-0.219392	-0.14239	0.0926428	-0.248769	0.675749	-0.745184	-0.269151
A_23_P108743	0.290618	-0.155959	-0.233229	-0.169512	1.19412	-0.160053	-0.0474064	-0.452409	-0.0954304	0.316161
A_23_P108751	2.11821	-1.26548	0.156425	4.3461	-1.37415	-1.67115	-1.09886	-0.424011	-1.86456	-1.71718
A_23_P108761	3.22371	1.37921	2.59203	1.42398	2.20247	1.6654	0.667002	1.16675	1.33083	2.24709
A_23_P108785	1.45183	0.411741	0.71764	0.855085	1.99832	0.0361485	0.821064	1.04529	0.647948	0.606987
A_23_P108819	-0.693448	-0.444636	-0.362867	-0.424681	-0.598506	-0.443285	-0.966379	-0.75088	-1.00805	-0.586329
A_23_P108823	2.5013	0.483211	-0.70036	-1.48666	-1.25584	0.790376	-2.03938	0.723507	-0.954	1.81795
A_23_P108835	-1.13592	-0.603427	-0.951481	0.939908	0.357359	1.16483	1.00238	0.522371	0.198528	0.947522
A_23_P108842	-0.765046	-0.0760633	-0.300476	-0.493535	-0.970498	-1.18941	-1.09232	-1.33793	-1.41486	-0.742559
A_23_P10885	0.885113	-0.661337	-2.34874	0.282297	-0.500426	-0.751845	0.410543	-0.929575	-0.927124	-0.260315
A_23_P108871	-0.614992	-1.3211	0.38385	0.0548582	1.26184	1.2796	-0.0771432	1.15045	0.168368	1.94722
A_23_P108883	-0.742567	-0.578251	-0.132278	-1.71025	-0.79509	-1.0845	-0.628852	-0.233672	-0.254601	-0.708045
A_23_P108911	-0.878313	-0.282695	-0.294243	-0.881755	0.140774	-0.759824	-1.14288	0.153013	-0.241944	-0.403564
A_23_P108922	0.133622	0.278538	0.0872728	-1.0379	-0.168937	0.787464	-0.18451	0.0162533	0.174936	0.635326
A_23_P108932	-2.11207	-0.553666	-0.200926	1.39961	-0.383546	1.15228	0.586165	1.13239	1.24251	1.13968
A_23_P108948	1.08185	0.552075	0.668377	1.57374	1.27279	1.56208	2.39976	1.07567	0.534808	0.52029
A_23_P108970	0.0162505	-0.637891	-0.904315	-0.265617	-1.73287	-0.388355	-0.047506	-0.159654	1.05949	-0.230372
A_23_P108990	-0.696305	-0.823517	-0.260652	-0.954265	-0.7721	-0.358243	-0.288246	-0.09544	0.321535	1.49056
A_23_P108994	-0.840365	-0.0718208	-0.15853	-0.231416	-1.07063	-0.768894	0.502373	-0.299242	-0.651944	-0.0926863
A_23_P109001	-1.49447	-1.09626	-0.44468	-1.05998	0.801634	-1.3237	-0.923326	-0.344737	0.798471	-0.682795
A_23_P109017	-1.46339	0.0185403	1.54481	0.668812	0.55824	2.06925	-0.709727	0.390238	-1.48019	-0.869543
A_23_P10902	-4.86674	-1.0536	-2.49712	-0.500878	-2.89139	-1.54137	-1.94375	-0.345322	-0.490921	-0.50034
A_23_P109026	-2.34713	-2.74794	-2.59028	-0.925635	-2.58648	-0.974577	-4.90718	-4.41284	-3.2247	-2.75337
A_23_P109034	-1.08579	-0.967695	-0.792596	-1.16248	-0.900042	-0.0441645	-1.04542	-1.84677	-0.698673	-0.729147
A_23_P109055	0.0909549	-0.236137	0.403925	0.754619	-0.560894	-0.69365	-0.637907	0.71007	-0.205819	0.0875569
A_23_P109072	0.365884	2.07604	1.74693	0.311661	1.23963	1.86471	2.49831	2.0304	1.4529	2.0879
A_23_P10911	-0.498008	-0.320101	-0.379216	-0.308308	-0.621188	-0.792284	-0.56893	-0.88783	-0.773047	-0.285288
A_23_P109122	-2.54022	-3.27464	-1.12014	-2.88631	-5.13623	-2.36902	-5.88606	-5.0491	-3.6138	-3.62156
A_23_P109133	-1.12035	-0.837274	-0.693945	-1.16788	-0.716409	-1.3487	-1.23125	-0.68634	-1.48196	-1.20925
A_23_P109143	2.74918	1.2938	1.96778	3.95983	3.10363	0.746127	2.34085	3.08976	3.02374	3.34096
A_23_P109171	1.89162	-0.198385	0.837565	1.20731	0.0564193	-0.877885	-0.583163	-0.458598	1.20969	0.0209358
A_23_P109184	-0.394407	-1.04944	0.444823	-0.158472	0.114865	-0.995422	-0.717182	-0.118405	-0.564038	-0.357078
A_23_P109193	-0.202938	-0.60645	0.245885	-0.108274	0.435276	0.788739	0.405621	0.73234	0.0664406	-0.365027
A_23_P109201	-0.0157599	-0.83328	-0.850066	-0.815199	0.947229	1.28266	-0.3032	2.01293	0.0730493	0.558444
A_23_P109224	-1.0387	-0.778628	-0.727676	-0.798336	-0.566279	-0.739563	-1.06562	-1.1217	-1.04731	-0.487042
A_23_P109229	-0.798782	-0.479454	-0.619515	-0.981024	-2.62412	-0.925666	-0.906704	-1.05757	-1.47693	-1.68135
A_23_P109235	0.404968	0.361107	0.277807	-0.349832	1.12383	0.36047	0.617799	0.882301	0.0710816	0.54291
A_23_P109254	0.322507	-0.452562	-0.172779	-0.635238	1.59701	1.55499	1.11862	0.435288	1.34806	1.17131
A_23_P109269	-0.818022	-0.406784	-0.209216	-0.641452	-0.203353	-1.42122	-1.07705	-1.22435	-1.26661	-0.661774
A_23_P10927	-0.72486	-0.225697	0.500727	-0.849999	-0.716253	-0.0169587	-0.189113	-0.820134	-0.95639	-0.334138
A_23_P109286	-1.16082	-0.0618544	0.693673	-0.478639	-0.156383	-0.290953	-0.764044	0.0749073	-0.0182818	-0.673994
A_23_P109304	-0.630899	-0.308719	-0.47239	-0.460243	-0.493439	-0.327091	-1.34768	-0.658374	-0.455666	-0.662443
A_23_P109320	0.10835	0.344235	0.30014	0.0660116	-0.0339228	0.178099	-0.0375346	-0.731585	0.313268	0.0727452
A_23_P109322	3.90877	2.42228	-0.642655	2.5942	-0.0560319	-2.83678	2.33476	1.20073	1.66856	2.45983
A_23_P109333	0.854098	1.15757	0.459161	0.670762	0.993069	0.694133	0.697431	0.972437	0.224523	1.22676
A_23_P109345	2.32677	0.729636	0.966736	1.91074	1.9713	0.586969	1.3902	2.07984	1.02505	2.0448
A_23_P10936	-0.596261	-0.27037	-0.571721	-0.449881	-0.821979	-0.364498	1.64908	-0.760966	0.120064	-0.696748
A_23_P109382	-0.56236	-0.57812	-0.667418	-1.05141	-0.164376	-0.713925	-0.86954	-0.72218	-0.919054	-0.657694
A_23_P109393	-0.513543	-0.375646	-0.177488	-1.02242	-0.797778	-0.708181	-0.825081	-0.740639	-0.129725	-0.690367
A_23_P109410	-1.47126	-0.266579	-0.281207	-0.933019	-1.4943	-0.923661	-1.19972	-1.53732	-1.24854	-1.05365
A_23_P109420	1.37494	0.49148	1.4467	0.717185	1.37004	0.996845	0.77444	0.345136	0.32663	1.23897
A_23_P109427	-0.682678	-2.62445	-0.709862	-0.696341	1.34491	-1.20116	0.135457	0.556612	-1.42558	0.95815
A_23_P109436	-0.219288	-0.10154	-0.366875	-1.10846	-0.157616	-0.0709473	-0.514042	-0.960622	-0.558415	-0.379017
A_23_P109442	0.731463	-0.0813762	-0.54522	0.513935	1.59864	1.04833	0.431488	-0.0988752	1.3497	2.35208
A_23_P109446	0.094912	0.532445	0.0899634	-0.0226911	-0.15353	0.153511	-0.382338	-0.070989	-0.228318	0.0115549
A_23_P109452	1.5948	0.816341	1.34495	0.908532	1.65848	0.853392	0.505579	1.14959	1.84636	3.48652
A_23_P10947	-0.377345	-0.603862	-0.100081	-0.104944	0.842207	-0.121209	-0.414753	0.0152744	-0.0243884	0.0256271
A_23_P109470	-0.706058	-0.358857	-1.3316	-0.243525	-0.715171	-0.397735	-0.688259	-0.885331	0.439291	0.185943
A_23_P109488	-0.247144	-0.299209	-0.0639285	-0.109453	-0.437939	-0.0768753	-0.699305	-0.457944	-0.0910886	-0.353602
A_23_P109508	-0.580259	-1.00759	0.141716	-1.5039	-0.448628	-0.36841	-0.462426	-0.848085	-0.206388	-0.83642
A_23_P109547	-0.0112716	0.310062	0.577558	0.387822	0.813277	0.783751	0.863887	0.983123	0.688841	0.169455
A_23_P10956	0.126711	-0.429904	-0.738818	0.186614	-0.396081	-0.0815367	-1.42557	-0.340479	-0.572633	-0.832344
A_23_P109593	-0.384779	0.158693	0.0141322	0.325896	0.341721	-0.0209888	0.508183	0.570733	0.862175	-0.267933
A_23_P109606	0.0269093	-0.307555	-0.199391	-0.375151	-0.277292	-0.351389	0.00441824	-0.204538	-1.01966	-0.446307
A_23_P109614	-0.446433	-0.0897058	0.34217	0.0657345	0.491662	0.152931	-0.234419	-0.222397	-0.27518	-0.172094
A_23_P109636	2.19573	0.182069	-2.21227	-0.136023	1.61591	2.07799	0.679768	1.40485	-0.102875	-0.362212
A_23_P109643	-1.4141	-0.816405	-0.682074	-1.1763	-0.997513	-1.31143	-1.07259	-1.08048	-0.748353	-0.746235
A_23_P109655	0.875053	1.27292	1.25526	1.03296	1.19242	1.6288	1.06514	1.48863	3.28499	1.78816
A_23_P10966	-0.455556	-0.740199	-0.920281	-1.00943	-1.33552	-0.876236	-0.71215	-0.000358632	-1.15754	-1.14298
A_23_P109677	0.18299	0.192916	0.266789	-0.192348	0.529224	-0.0705208	0.568064	1.44476	-0.409174	0.237299
A_23_P109682	-0.0400392	-0.163223	-0.193873	0.387544	0.661731	-0.0661714	0.747094	0.253471	0.171326	1.25302
A_23_P109720	0.042338	0.559225	0.122427	0.432765	0.662905	1.24672	-0.487196	-0.783108	-0.0909314	-0.397254
A_23_P109733	0.802561	0.156624	0.607808	0.401431	-0.849169	1.07961	-0.961675	0.0552136	-0.293687	0.828693
A_23_P109768	1.30629	0.381721	1.1708	0.39196	1.0566	0.859098	1.95694	1.27876	0.447453	0.648772
A_23_P109774	-0.356338	-0.182059	0.00448846	-0.188836	-0.839981	-0.756082	-0.53994	-0.763478	-0.573411	-0.154395
A_23_P109785	0.669737	0.237241	0.346562	0.0769659	-0.483145	0.842131	0.451625	-0.23715	0.429594	0.208984
A_23_P109794	0.294693	0.369361	0.311599	-0.20173	0.486161	0.97016	-0.152658	0.449247	0.382036	-0.00058896
A_23_P10980	0.00748021	-0.572544	0.120662	-0.306949	0.0532107	-0.465295	0.271964	-0.0167485	-0.0212522	-0.71997
A_23_P109812	-0.137721	-0.327021	-0.137245	-0.28971	-0.514364	-0.280232	-0.300782	-1.51077	-0.386094	-0.676551
A_23_P109821	-0.000988439	-0.198232	-1.04386	-1.10793	-0.555258	-1.23913	0.112657	-0.758576	-0.864253	-0.9742
A_23_P109843	-0.089309	-0.0607031	-0.506098	-0.228859	-0.194609	-0.425151	0.668241	-0.124222	0.527669	0.353869
A_23_P109864	-1.00175	-0.68352	-0.510619	-0.439667	-1.24112	-1.25194	-0.969693	-1.43954	-1.07921	-0.769767
A_23_P10987	1.37898	0.0255503	-0.734808	0.0391966	-0.239058	-0.0407294	0.549977	-0.491885	0.236638	-0.0100586
A_23_P109877	1.32318	0.633328	0.819838	-0.118935	0.552659	0.935337	1.7614	0.886659	0.848388	-0.0207436
A_23_P109881	-1.55657	-0.76064	-2.50378	-1.60538	-2.74096	0.182613	-1.73894	-1.35734	-1.72347	-3.53713
A_23_P109895	1.32738	1.51599	0.654632	0.672072	0.486009	1.23795	0.536084	0.72422	0.904808	-0.0314967
A_23_P109907	0.448452	1.22857	0.735758	0.758149	0.547817	1.20077	0.374228	0.0458374	0.454627	0.43793
A_23_P109913	-0.210998	-0.863413	0.137097	-0.455336	0.0879317	0.656573	-1.0333	-1.6163	-1.45929	-0.846835
A_23_P109928	4.07786	3.61068	3.16474	3.49247	4.12415	3.79548	4.29912	3.63217	3.09296	3.5491
A_23_P109934	-1.26833	0.132026	-1.38007	-1.11044	0.205699	1.32208	0.4335	0.391032	-0.0507602	-1.08414
A_23_P10995	1.46488	0.429387	0.714819	-0.109739	-0.823615	-0.720473	0.522006	-1.095	-0.610164	0.196865
A_23_P109950	-1.00076	-0.172378	-0.237612	-0.836743	-0.559446	-0.488459	-0.651974	-0.749388	-1.0168	-0.618422
A_23_P109964	-0.00271057	0.559326	-0.204641	-0.425974	-0.416269	-0.218533	0.668684	-0.022453	-0.108044	-0.199104
A_23_P109974	-2.40919	-0.997714	-1.05286	-0.959372	-2.96854	-1.81338	-1.87971	-2.18163	-1.99776	-2.91995
A_23_P109988	-0.0505211	-0.211195	-0.476765	0.0474766	0.433858	0.769292	-0.508213	0.481365	-0.381182	0.316847
A_23_P110005	0.168565	-0.0203882	-1.47716	-0.809204	0.611084	1.16568	0.703219	0.919531	1.26859	0.223037
A_23_P110022	-0.681304	-0.641932	-0.239873	-1.76139	-0.702661	-1.05318	-1.27105	-1.18806	-0.736725	-0.655357
A_23_P110031	-0.321665	0.444415	-0.290031	-0.227058	-0.319743	-0.215689	0.135882	0.0963404	0.109494	-0.133063
A_23_P11005	-1.93089	-1.21168	-1.33348	-1.97497	-2.71202	-2.34167	-2.93629	-3.34629	-2.17559	-1.9832
A_23_P110052	0.413804	0.425529	0.880359	0.674218	-0.916225	0.239004	-0.378106	0.0222924	0.0716855	0.938529
A_23_P110062	0.191223	0.32205	0.132996	-0.0501923	0.033394	0.277029	0.172342	0.712616	0.167803	-0.258255
A_23_P110076	1.08827	0.345325	0.765587	0.298542	0.855835	0.775236	0.644691	0.925095	-0.122445	0.87026
A_23_P110090	0.798105	-0.421988	-1.42107	-0.377426	-0.0330094	0.72386	0.715047	0.212925	1.94635	0.164271
A_23_P110108	-0.249255	-0.509075	-0.152832	-0.52615	0.379225	-0.525696	-0.0475049	-0.378817	-0.00919522	-0.548556
A_23_P110116	-0.838513	-0.49579	-0.119689	-0.565926	-0.411271	-0.737858	-0.819326	-0.332658	-0.455601	-0.595115
A_23_P110122	0.0896934	-1.96817	-1.28778	-1.08276	-1.15784	0.522789	1.19553	-0.0991038	-0.310548	-0.425265
A_23_P110135	0.405443	0.279494	-0.510752	-0.164168	-0.707549	-0.344763	0.0756082	-1.23756	-0.505471	-0.286476
A_23_P110151	-1.30238	-0.0326382	0.23806	1.32571	-0.430517	-0.10146	-1.60487	1.15978	1.32514	1.00386
A_23_P110167	-0.0011196	-1.45735	-1.4572	-2.33351	0.152808	2.9145	0.616481	0.930385	1.03768	1.89742
A_23_P11017	-0.50723	-0.331761	-0.720801	0.181248	-0.15277	-0.0854343	-0.61264	-0.4698	-0.435933	0.0646552
A_23_P110175	-0.0611847	-0.564996	0.0535589	-0.410062	-0.588865	-1.09624	-0.332785	-0.392306	0.021683	-0.432329
A_23_P110184	-0.127093	0.382099	0.921564	0.24221	0.894049	-0.184263	0.606493	0.668854	-0.046481	0.380141
A_23_P110196	0.856234	0.156249	0.384261	0.0832317	0.46674	0.388441	-0.0172566	0.424465	-0.22387	0.304263
A_23_P1102	1.3218	2.49125	2.22178	2.58658	1.70685	1.42814	3.48699	0.336346	0.999369	2.77648
A_23_P110204	-0.334554	-0.303121	-0.0375291	-0.409178	-0.0589305	-0.571272	0.0158632	-0.126556	1.34551	0.0991982
A_23_P110212	0.122969	-0.245328	-0.100561	-1.09004	-0.734623	-1.44284	-1.25501	-0.98868	0.0186877	-0.425878
A_23_P110234	-0.756473	-0.669347	-0.515176	-0.585819	-0.828664	-0.817708	-0.919817	-0.703948	-1.06001	-1.03696
A_23_P110243	0.0995642	-0.585216	1.40096	1.48157	1.62434	1.11934	1.52661	1.7798	0.527596	1.19309
A_23_P11025	0.257853	-0.064896	-0.384026	0.50839	-0.38871	-0.482048	0.450911	0.670241	-1.37619	-0.475591
A_23_P110253	-0.143544	0.233889	0.0772719	0.794469	1.76821	0.524863	0.116202	1.01054	1.60166	0.640674
A_23_P110266	-2.06096	-0.656828	-0.184748	-0.558189	-2.55067	-1.94196	-1.88227	-2.04794	-1.63925	-1.44951
A_23_P110276	-0.170282	-0.0603229	-0.0134691	0.0710882	0.504237	-0.295845	0.183091	0.658742	0.754108	0.214491
A_23_P110288	-0.167235	-0.264029	-0.227474	-0.59152	-0.994413	-0.909465	-0.764822	-0.152699	-0.00886566	-0.706285
A_23_P110299	0.2801	-0.0526382	0.084394	0.15864	0.474251	0.930228	0.236095	-0.275672	-0.49312	-0.15245
A_23_P110304	0.38126	-0.800719	-0.242362	-0.0304822	0.24219	-0.112422	-0.784906	-0.548054	-0.137096	0.0686723
A_23_P110319	-1.14217	-0.357497	-0.911567	-1.07983	-0.932796	-0.54578	-0.833943	-0.223111	-0.962125	-0.314353
A_23_P11032	0.258947	0.0189954	-0.125809	-0.228758	-0.402445	-0.39394	0.0825292	0.220334	0.0556378	0.218264
A_23_P110345	1.04129	0.327582	0.664092	0.500091	1.21984	2.28696	0.610053	1.51777	1.06944	0.981401
A_23_P110362	0.618443	0.501985	1.03668	0.984058	1.77714	0.660873	-0.0443915	0.606385	2.7386	2.59796
A_23_P110386	0.638912	-0.105257	-0.16639	-0.54335	0.933239	0.729058	0.351004	-0.295131	-0.746026	-0.126907
A_23_P110403	2.68415	0.315388	0.768651	3.69991	1.96787	-0.954182	-1.02087	1.27828	3.38257	-1.2831
A_23_P110412	-0.320195	-2.14295	-0.42399	-0.988991	-2.37847	0.992903	-0.480749	0.611101	-0.451388	0.725156
A_23_P110430	0.146346	0.270716	0.461233	1.02766	0.403801	1.02902	0.886965	0.463608	0.355179	0.853034
A_23_P110433	0.223247	0.572461	0.376811	1.66556	0.0403424	1.53572	0.470112	0.741482	1.2761	0.71501
A_23_P110445	0.396846	0.902728	-0.706309	-0.780759	-0.0779102	0.569523	-1.03621	-0.694291	-0.974187	-0.552497
A_23_P110462	-0.510282	-0.220994	-0.118288	-0.384565	-0.316489	0.638658	-0.379899	0.59732	0.956803	-0.125524
A_23_P110473	-0.559814	-0.0313546	-0.231131	1.59467	-0.375267	0.779754	-1.87618	-0.659105	0.603495	-0.567155
A_23_P110492	-1.07196	-1.39859	-1.13511	-1.01441	-0.345122	1.32301	0.0291573	0.19214	1.45637	-0.0984052
A_23_P110504	-0.601146	-0.221541	-0.171375	-0.336707	-0.282494	0.56217	-0.433778	0.420129	0.69367	-0.457984
A_23_P11051	0.350673	0.393871	0.326262	0.314499	0.0675972	0.292495	2.09323	-0.333956	0.564646	0.240057
A_23_P110531	2.7032	2.78459	2.65297	2.62554	2.02339	1.96363	1.73872	2.15444	1.75383	2.90056
A_23_P110557	-0.772102	-0.614119	-0.585917	-0.651042	-0.904244	-1.26474	-1.30589	-1.24124	-0.94023	-1.02222
A_23_P110569	-1.91834	-1.51236	0.0827051	-0.525395	0.831995	0.355632	-0.329311	-2.10236	0.685212	1.43509
A_23_P110571	-2.24256	-0.0610862	-3.73318	-1.0174	-0.718181	-0.753544	-0.786235	-1.67533	-0.267485	-0.369318
A_23_P110585	-0.517132	0.116534	-0.078901	-0.59952	-1.08525	-0.954322	-1.15444	-0.884856	-0.373187	-0.318679
A_23_P110598	2.5158	2.28759	1.87305	1.63879	2.6842	2.61538	2.59359	1.67727	3.09899	2.3261
A_23_P110606	-0.196749	-0.0450641	0.270362	0.326279	-0.418181	0.340438	-0.35978	0.0356686	-0.294941	0.569844
A_23_P110611	0.83642	-0.48683	0.298222	0.251129	1.92411	2.35015	1.87804	1.43013	1.20876	1.04687
A_23_P110624	0.837495	-1.25743	3.05073	0.752852	1.06292	1.47113	-0.438703	-0.515098	-0.198573	3.52886
A_23_P110643	0.800796	-0.674293	-0.133306	0.453373	0.501811	0.756958	1.55006	0.402593	0.758538	0.886589
A_23_P110655	-0.788366	0.29538	0.216172	-0.110343	-0.401001	0.621109	-0.50311	-0.676192	0.0209975	-0.129649
A_23_P110661	0.71519	-0.171231	0.0816536	0.772835	1.35374	1.88805	0.826122	1.1673	1.44243	0.973297
A_23_P110686	0.611559	-0.43879	-0.582223	-2.13183	-0.335171	2.04972	0.251231	-1.03476	0.449642	0.205166
A_23_P110699	0.0920433	0.315786	0.336306	-0.0704201	-1.12195	-1.21265	-1.0434	-0.965108	-0.816222	-0.472817
A_23_P11070	-0.40474	-0.675847	-0.222397	-0.146448	0.629896	-0.317813	-0.156796	-0.215929	-0.421841	-0.190108
A_23_P110704	-0.0728119	-0.700179	-1.33	0.753108	0.989595	1.7691	1.58884	1.04399	1.79528	0.844487
A_23_P11071	-0.73064	-0.906998	-1.4502	-1.45842	-2.63493	-2.58113	-2.17381	-2.42987	-2.29439	-2.41404
A_23_P110712	-0.218627	1.26345	1.77057	3.09884	2.20818	1.02966	-0.871091	-0.153117	-0.295658	1.3155
A_23_P110725	2.0618	0.498623	1.83294	2.09777	1.15115	0.827167	1.49431	1.50708	2.20243	-0.394865
A_23_P110764	-0.20276	-0.0849426	-0.328408	-0.0619847	-1.02047	-0.292961	-0.589356	-0.0742417	-0.517308	-0.128297
A_23_P110777	-0.175455	-0.108947	0.200142	-0.555677	0.127296	0.312496	-0.22513	0.415137	-0.603333	-0.417165
A_23_P110787	0.718913	0.441904	0.115182	1.16679	0.514005	-0.532357	-0.952131	-0.16143	-0.354055	1.03088
A_23_P110791	-7.3881	-8.08098	-9.02064	-4.38844	-8.16643	-7.54395	-6.42919	-7.92741	-7.73643	-6.86131
A_23_P110802	2.24787	0.94483	1.24769	1.74893	4.3045	1.86661	1.3336	2.6926	1.4387	2.35335
A_23_P11081	0.479312	0.522509	0.223248	0.939696	-0.0963905	-0.0685594	0.211592	0.460745	-0.16352	0.0457275
A_23_P110811	0.927853	-0.550723	-0.957186	0.813757	1.95842	2.4481	2.29072	1.60927	2.24122	1.4598
A_23_P110837	2.15608	2.18289	1.99738	2.37777	1.6156	-3.0183	-1.42213	-4.35364	-3.94949	1.80888
A_23_P110846	0.461265	0.574338	0.379089	0.517579	1.05137	0.313013	0.6535	0.819931	0.13042	0.505203
A_23_P110851	-2.4178	-1.23924	-1.15278	-1.15822	-3.00819	-1.78506	-1.94162	-2.13211	-2.14866	-2.92307
A_23_P110879	-0.0819149	-0.259463	0.308104	-0.211691	-0.288712	-0.112884	-0.524008	-0.323436	-0.935621	-0.471768
A_23_P110882	-1.79704	0.116476	-0.679736	0.366867	-0.679922	-0.872628	-1.04474	-1.39129	-0.356401	-0.524688
A_23_P110896	-0.799769	-1.72171	-0.896678	-0.979427	0.292113	0.0143919	0.230177	-0.125244	-0.300807	0.0105914
A_23_P110903	0.325306	0.790386	0.314889	0.586234	0.198458	-0.216733	0.874659	-0.215261	0.770309	0.130387
A_23_P110941	0.591611	0.682687	-0.30813	0.455262	0.910033	-0.123033	1.48192	1.05694	-0.0961655	0.242842
A_23_P110957	0.387126	1.28795	0.818523	0.74808	1.16603	0.347611	0.80883	0.74364	0.367815	1.35451
A_23_P110961	0.215075	0.421117	0.1096	1.93179	0.759048	0.992947	0.613391	1.35158	1.55964	0.480203
A_23_P111000	-1.01724	0.00345363	-0.470502	-0.408222	-0.833112	-0.39756	-0.713475	-0.26339	-0.392562	-0.38121
A_23_P111005	0.31911	0.730575	-0.148381	0.447739	1.05215	0.3522	-0.388171	-0.189937	-0.316211	-0.327386
A_23_P111020	-0.789139	-0.498748	-0.520043	-0.588164	-1.69686	-1.1865	-1.25835	-1.35678	-1.23411	-1.26093
A_23_P11103	-0.407055	-0.769071	-0.508032	-1.28076	-2.41855	-0.770569	-0.957448	-0.981577	-1.30878	-1.6393
A_23_P111037	0.714334	-0.84144	-0.702515	-0.269931	-0.0550504	0.341894	0.823463	0.392376	-1.05857	-0.887567
A_23_P111041	1.32657	0.342369	-0.0102425	0.686772	-1.45051	-1.06004	-2.02417	-0.78636	-1.04668	0.542412
A_23_P111054	2.27563	1.7644	1.04143	0.771473	-1.35198	-1.60331	-0.901451	0.724769	-1.03461	0.370353
A_23_P111088	-0.285291	-0.0292415	-0.310767	-0.296706	0.690715	0.610361	0.446077	1.03947	-0.14681	0.0879243
A_23_P111092	-1.23881	-0.508015	-0.659442	-1.64677	-1.88223	-1.34822	-1.38328	-1.65537	-1.41548	-1.37918
A_23_P111112	0.464576	0.848067	0.506015	1.11401	0.682645	0.322033	-1.36074	-1.19509	0.00654753	-0.692559
A_23_P111126	-1.11798	-0.817319	-1.10192	2.43865	-3.7779	-3.73885	0.75058	-3.03536	-3.6456	-3.22397
A_23_P111132	-1.85545	-1.49191	-0.704613	-0.686197	-2.07177	-0.761436	-3.1056	-2.41211	-0.647004	-0.660698
A_23_P111141	2.2497	1.81217	0.978507	1.40043	0.0589745	0.366065	0.682632	-0.225191	0.293621	-1.02913
A_23_P111155	-0.43306	-0.282234	-0.361847	-0.417865	-0.818408	-0.855011	-0.48906	-0.61627	-0.569792	0.0177892
A_23_P111171	-3.84964	-4.37109	-4.47922	-1.96886	-5.82823	-5.71045	-4.64712	-4.77088	-4.7237	-5.02819
A_23_P111188	-3.40059	-2.21361	-2.54829	-2.87116	-3.78281	-3.66938	-3.53645	-3.56787	-3.52451	-3.01044
A_23_P11119	-1.1825	-0.036236	-0.263223	0.304972	-0.574266	-0.486669	-0.60201	-0.608598	-0.749054	0.0139253
A_23_P111194	-1.85467	-1.98319	-1.10999	-1.52608	-0.961677	-1.22729	-1.97075	-1.17497	-1.91576	-2.13419
A_23_P111206	-0.31666	0.866811	-0.910063	1.4551	1.25996	0.831425	-0.913373	0.622164	-2.1915	-2.08728
A_23_P111228	0.38075	0.226849	0.426652	0.330574	0.531619	0.583798	-0.149546	1.06409	1.16101	0.597581
A_23_P111240	0.870611	-0.859065	-0.151333	-0.374935	-1.32412	-2.06234	-1.67169	-1.48952	-1.88626	-1.32269
A_23_P111260	1.66206	1.92771	2.13166	1.9551	1.70563	1.6993	2.12649	1.89237	3.085	2.24761
A_23_P111267	0.324987	0.0969561	0.538301	0.415458	-0.902144	-0.360915	0.0782232	0.65463	-0.103716	0.13067
A_23_P111273	3.09792	2.09484	2.72119	2.73165	3.44326	2.46094	2.23829	2.72884	2.59356	2.97892
A_23_P111288	1.34321	0.0146445	-0.0041405	1.49528	2.33333	1.78515	1.96079	1.47668	1.75298	1.63684
A_23_P111297	2.30994	1.47414	1.98532	2.3883	2.27519	1.9805	2.00711	1.53261	1.48994	1.07835
A_23_P111303	1.26621	0.527428	0.479839	1.10425	1.44561	1.15156	0.766722	0.562781	0.308023	0.699265
A_23_P111306	0.885521	0.79729	0.944929	1.21458	-0.0531419	0.709284	0.405006	1.1848	-0.0889997	0.331195
A_23_P111311	-0.242902	-0.193793	0.215909	0.254232	-0.151944	0.266746	0.0796216	-0.438385	0.121259	0.80347
A_23_P111321	1.34437	1.42731	1.3475	0.352501	1.40239	2.20733	1.66924	2.26459	1.06337	1.23903
A_23_P111343	-0.185927	0.936027	0.00277754	0.502181	1.91171	1.46895	1.73994	1.017	1.01504	1.09385
A_23_P111360	1.1811	0.238046	0.866188	1.59403	0.625245	1.43491	1.05653	1.32153	0.539234	2.25647
A_23_P111361	-0.160493	-0.0947795	-0.146511	-0.125516	0.106361	0.355957	-0.225277	0.228248	-0.247125	0.270039
A_23_P111373	1.81294	0.162763	1.22746	1.06043	1.78955	1.30454	0.888938	0.55482	0.801883	0.520792
A_23_P111381	0.16964	-0.336504	0.439054	1.13612	1.65475	0.295793	0.685062	1.49629	0.135472	0.563711
A_23_P111395	-0.258074	-0.269414	-0.244639	-0.743875	-0.569632	0.274856	0.0545092	-0.60059	0.21086	-0.536046
A_23_P111402	-0.853385	-1.6381	-1.01951	0.262511	-2.03895	0.189662	0.104432	-0.71283	0.399684	-0.509995
A_23_P111413	-0.472936	-0.144442	-0.0364816	-0.331242	0.333241	0.197764	0.277756	-0.630782	0.0221513	-0.0785966
A_23_P11144	0.166467	-0.0813964	-0.423265	-0.158092	0.0201064	-0.354681	-0.480278	-0.487041	-0.48275	-0.542432
A_23_P111452	-0.213358	-0.38574	-0.288946	-0.434995	1.31457	0.60755	0.682393	0.868401	0.349787	0.735306
A_23_P111480	-0.592827	-0.153705	0.293462	-0.724346	0.335882	0.558329	0.612022	0.740569	2.40578	0.341538
A_23_P111481	-0.76648	0.110422	-0.040152	-0.548931	0.239658	-0.57016	-1.32473	-0.577376	-0.367373	-0.425496
A_23_P111487	0.0400551	-0.531377	-0.60079	0.122868	0.458149	-0.252217	-0.602939	-0.164916	-0.354001	-0.213502
A_23_P111492	-0.304634	-0.317229	0.354483	-0.883737	-0.359093	-0.548202	-0.782618	0.29441	-0.535652	-0.449335
A_23_P111506	-1.6261	-1.06996	-0.815334	-2.41264	-2.59299	-2.17848	-3.73963	-4.39811	-2.65938	-1.56939
A_23_P111517	-0.295494	-0.134655	-0.630767	-0.301606	0.0974099	0.228032	0.0381011	-0.376948	-0.584052	0.0708204
A_23_P111525	-0.795857	-0.155773	-0.44762	-1.18397	-2.60888	-1.52601	-1.55971	-1.63743	-1.58785	-1.66942
A_23_P111531	-0.25063	-0.848851	-0.848317	-2.73034	-0.801561	1.59422	-2.32344	-0.794788	0.673752	-2.54548
A_23_P111571	-1.36522	-0.888078	-1.115	-2.38248	-2.35526	-1.80248	-2.20031	-2.34092	-2.02678	-2.3176
A_23_P111583	-0.350058	-0.336121	0.0611055	-4.42332	-0.464002	0.735148	0.182801	-0.0256783	-3.61278	-1.15795
A_23_P111593	-0.431981	-0.1722	0.865326	0.0839099	1.38629	1.05174	-0.137861	-0.0741738	0.962061	1.76055
A_23_P11160	0.628282	-0.162876	0.956923	0.774872	-0.188506	1.17917	2.22444	1.76264	0.733868	0.184472
A_23_P111604	0.378117	-1.04864	-0.69149	0.139302	-0.85184	0.263231	-1.96746	0.0805586	0.443858	0.291041
A_23_P111621	1.07277	1.01904	0.858442	1.19818	0.522826	-0.121999	-0.81113	0.0754333	0.282755	-0.443761
A_23_P111635	0.33294	0.24029	0.503513	0.237191	-0.451981	0.734035	1.14382	-0.0166872	0.43526	-0.0851728
A_23_P111657	-0.671436	-0.315354	-0.446524	-0.607307	-0.573727	-0.778625	-1.35584	-1.28479	-0.766751	-0.892344
A_23_P111662	-0.524784	-0.711109	-0.213731	-0.0758892	-0.634128	0.0324464	-0.36828	1.11525	-0.113094	0.202847
A_23_P111672	0.61373	0.65266	0.293545	0.47269	0.432083	1.21805	0.586734	1.09398	-0.0212972	0.400099
A_23_P111698	-1.12477	0.0743989	0.0271772	-0.172909	-3.09854	-2.50359	-2.63148	-2.53533	-2.0223	-1.71232
A_23_P1117	-1.2821	-0.995397	-1.72168	-0.498741	-1.42832	-0.413519	-0.121728	-0.182738	-1.95181	-0.661423
A_23_P111701	-1.18851	0.155171	1.05011	1.84259	0.162643	2.07247	0.790625	2.31097	2.59152	2.01033
A_23_P111712	0.0477681	-0.561429	0.247176	-0.283637	-0.636644	0.131649	0.00872577	-0.0349287	-0.523168	-0.240023
A_23_P111724	-0.157218	-0.0543957	0.117774	-0.14556	-2.26321	0.646379	-0.0877964	-0.878777	0.519772	-0.766565
A_23_P111737	-0.159703	-0.718644	-0.095118	-0.489041	-0.20301	-0.265649	-0.139332	0.0316496	-0.644592	-0.536598
A_23_P111745	-1.91267	-0.144157	-0.389911	-1.78553	-0.428281	-0.905003	-1.56134	-1.09078	-0.616158	-2.07801
A_23_P111753	1.35402	0.0873271	0.344469	0.395253	1.51419	1.19333	1.13041	1.36671	1.56173	0.852114
A_23_P111766	4.39909	6.06409	6.1646	5.61916	4.26219	4.03886	5.51069	4.51714	5.18238	4.86192
A_23_P111797	-0.710363	-0.0754538	-0.451428	-0.682943	-0.631721	-0.316469	-0.662502	-0.437994	-0.54981	-0.593071
A_23_P111804	0.736018	0.514052	-1.14687	0.369868	0.0628599	2.172	0.267626	0.0789748	-1.71705	0.210685
A_23_P111811	-0.350304	0.0570325	-0.385801	-0.225966	0.925595	2.56845	2.34573	2.02096	0.544266	0.0758846
A_23_P111826	0.119425	-0.0857447	0.011971	-0.175799	0.125257	0.473567	0.785827	-0.179746	-0.0571978	0.0205444
A_23_P111835	1.55616	0.438819	1.16681	0.937715	2.03283	1.95612	1.21075	1.51315	1.18999	1.5398
A_23_P111843	-0.474224	-0.181296	-1.11316	-1.48605	-0.77706	-1.63539	-1.60266	-1.76929	-1.77111	-1.80279
A_23_P111860	-1.488	-0.268502	-0.133269	-0.294453	0.874358	0.719505	0.690898	-0.487101	0.0405601	0.981601
A_23_P111865	0.514828	0.29451	0.493001	0.861264	0.485096	0.313537	0.410444	0.22434	0.859896	0.3353
A_23_P111888	1.09194	-1.13644	1.18639	1.47973	2.9789	-0.397271	-0.533199	0.789308	1.22564	0.637147
A_23_P111919	-1.61177	-1.1777	-0.369783	-0.968671	-1.16348	0.0734261	-0.260598	-1.1147	-0.891372	-0.748229
A_23_P11192	1.1088	0.924878	2.09392	1.97796	2.37989	0.444816	1.6735	3.42207	0.887399	0.547301
A_23_P111929	-0.30332	-0.317441	-0.413152	-0.114425	-1.20304	-0.778404	-0.58851	0.0804621	-0.492126	-0.472588
A_23_P111947	0.19992	2.08463	0.848923	0.129342	-0.0295825	-0.0580911	-0.0913784	-1.14988	-0.411061	0.655889
A_23_P111961	1.34682	1.69923	1.34712	2.25519	2.52298	2.01449	1.92612	1.50234	1.65377	1.10108
A_23_P111978	-0.888853	-1.05962	-0.66993	-0.95171	-2.40724	-2.04246	-2.88368	-2.25477	-1.24221	-1.28042
A_23_P111981	-1.93747	-0.645951	-0.884165	-1.00804	-2.09026	-2.07024	-1.64118	-1.59963	-1.39083	-1.57572
A_23_P111995	0.572283	1.12151	1.64589	1.87456	3.53742	0.139674	0.510091	1.86459	3.69684	2.64027
A_23_P112004	-2.83339	-0.871282	-4.3745	-1.51941	-3.2512	-0.895609	-1.7145	-1.23962	-3.24	-2.52334
A_23_P11201	-1.46361	-1.09751	-1.26799	-1.11676	-1.66511	-2.04664	-1.45594	-1.75986	-1.73122	-1.21701
A_23_P112016	0.604239	-0.550626	0.155803	-0.419877	0.314695	0.0613629	-0.749801	-0.757892	-1.0098	0.0420011
A_23_P112026	2.49116	2.24484	2.40815	2.44846	0.897218	-0.0730095	2.373	0.199851	0.760653	2.1862
A_23_P112061	-1.37104	-0.60202	-1.17465	1.34312	-0.93704	-0.763367	-0.535801	-1.49302	-1.01999	-1.23037
A_23_P112078	-0.421444	-0.465748	-0.131864	-0.286131	0.258187	0.0462843	1.26891	0.0498427	-0.160859	-0.252723
A_23_P112086	-0.0892788	0.304056	-0.0456673	-0.135928	-0.00499279	-0.721899	-0.557572	-0.691336	-0.175401	0.517678
A_23_P112100	0.00238303	0.156839	0.246474	-0.25676	-0.310548	-0.0788155	-0.775836	0.00474944	-0.600452	0.186951
A_23_P112103	-0.429446	0.347363	-0.260023	-0.53779	-1.19306	-0.495182	-0.574249	-0.632122	-0.904675	-0.779602
A_23_P112113	-0.127302	-1.6134	-0.258229	0.00931815	-1.27686	-0.182628	-0.209664	-0.583348	-0.303092	0.196325
A_23_P112135	0.05917	-2.08568	-1.0529	-0.708393	-0.346886	0.0759516	0.443236	0.855328	0.857101	0.127873
A_23_P11214	1.6146	0.522274	1.63941	1.53183	2.24262	1.61201	1.32992	1.81505	1.68407	1.57021
A_23_P112159	0.636103	-0.124221	2.0466	-0.190441	1.97387	-0.23853	0.489138	0.158994	-0.10635	0.587315
A_23_P112162	0.131755	-0.615552	-0.42814	-1.06058	-0.432941	-0.46129	-0.417916	-1.09683	-0.300885	-0.47177
A_23_P112173	0.0786177	0.143311	-0.234994	0.0802009	0.48159	-0.160347	0.101292	-0.0278065	-0.440881	-0.0968144
A_23_P112187	-0.808393	-0.232507	-0.516664	-0.786999	-2.0783	-1.51712	-1.54461	-1.6297	-1.2836	-1.25687
A_23_P112201	1.60954	0.196501	-0.427932	0.50349	1.65743	1.94961	0.943042	1.51819	1.12768	0.311402
A_23_P112220	1.76928	2.93898	1.37931	1.88694	0.963546	1.94499	2.785	1.3144	2.24746	2.87449
A_23_P11224	0.990639	-0.138128	0.823149	1.85442	2.74527	1.26282	1.79685	2.47796	1.53424	2.14322
A_23_P112241	-2.43323	-1.26846	-0.735057	-0.846557	-2.63096	-1.78617	-1.90069	-2.01313	-1.63347	-2.58737
A_23_P112251	0.690286	-0.297988	-0.164764	0.605948	0.425976	0.110639	1.02221	0.931432	-0.073501	1.6633
A_23_P112260	0.937404	1.31467	0.204905	0.631345	0.716676	0.487844	0.844962	0.303399	0.357091	0.354225
A_23_P112275	0.0294534	-0.0876471	0.041255	0.188394	-0.0022134	-1.07698	-0.164294	-0.758944	-0.826031	-0.741035
A_23_P112289	0.0350618	-0.288801	-0.450934	0.264748	0.341725	-0.00139015	0.278582	0.833353	0.540631	-0.0631807
A_23_P112296	-0.835753	-0.621214	-0.401392	-1.10156	-0.303247	-0.175522	0.0607587	-0.36661	0.0496973	-1.07443
A_23_P112311	1.61039	0.907137	0.863179	1.84668	2.01406	1.13669	1.36844	1.80813	1.0815	-0.0894777
A_23_P112327	-0.600536	-0.123338	-0.317245	-0.359782	-0.282631	-0.70048	-0.400832	-0.856344	-0.62024	-5.19953
A_23_P112341	0.877186	0.00915564	-0.432949	-0.154381	1.41302	-0.0991381	-0.00756352	0.610762	0.351631	0.883903
A_23_P11237	-0.247829	0.178203	0.213865	-0.205332	-0.735	0.039809	-0.0195678	-0.793048	0.913987	-0.215503
A_23_P112397	-0.567242	-0.503389	-1.45176	-1.17028	-0.778651	-0.940614	-1.18235	-1.55929	-1.13528	-1.36605
A_23_P112406	-0.400464	-0.175344	-0.411375	-1.18522	-0.783903	-0.968271	-1.02785	-1.00327	-0.902427	-0.831611
A_23_P112412	1.52364	1.00358	1.05892	1.04909	2.66655	1.20175	1.82752	1.5474	1.85312	1.68325
A_23_P112429	2.51134	2.04335	1.33357	0.358751	1.7544	1.5668	2.15011	1.77233	0.805618	-0.589216
A_23_P11244	-0.133755	0.415392	-0.00304358	0.726199	1.09337	0.90388	0.414677	1.27111	1.44391	0.394717
A_23_P112452	-5.25299	-3.56355	-4.47326	-0.471821	-4.46465	-2.73024	-1.92871	-2.10145	-1.50099	-2.65788
A_23_P112470	-1.02035	-0.994885	-0.802213	-0.957793	-1.00778	-1.35158	-1.34688	-1.21628	-1.07644	-1.43728
A_23_P112478	1.10007	0.584458	0.267696	1.78052	1.88742	1.06438	0.905668	1.54375	0.356354	0.908442
A_23_P112481	-0.0956012	0.495853	-0.769063	-0.559261	-0.949942	0.057854	-0.170977	-0.333015	0.354303	0.107853
A_23_P112482	-0.493711	0.253408	-0.295204	-0.380381	-0.539713	-0.220134	-0.74146	-0.834723	-0.678933	-0.471198
A_23_P112512	0.520768	0.475558	0.353856	0.24721	0.196075	-0.467602	-0.422057	1.44642	1.06618	1.36277
A_23_P112531	-2.30185	-0.469553	-0.839472	-1.10436	-0.731867	-0.541963	-2.20183	-2.62117	-1.2652	-0.153902
A_23_P112548	-0.751416	-0.114455	-0.100899	-0.451791	0.300841	-0.182588	-0.276781	-0.565436	-0.0473565	-0.196844
A_23_P112554	-0.962496	-0.120588	0.441339	2.15956	0.773206	-0.0406246	0.697573	0.891219	1.05907	1.71644
A_23_P11256	-0.40287	-0.374348	-0.356253	-0.24036	-0.736547	-0.687377	-0.245869	-0.527928	-0.6551	-0.312495
A_23_P112564	0.537964	-0.407947	0.142647	-0.171385	-0.407164	-0.0616378	0.0664263	-0.90006	-0.0591939	0.196211
A_23_P112596	1.39012	0.844967	1.36709	1.78898	1.04265	1.23623	1.44166	1.17057	-0.00490505	0.776932
A_23_P1126	-1.12428	-0.708693	-2.41103	-2.51044	-1.55561	2.07408	0.236492	-1.23635	-1.57416	-0.754463
A_23_P112602	-0.60221	-1.04797	-0.855469	-0.646005	-0.257968	1.36482	-1.73202	-0.909631	-0.233955	-1.02564
A_23_P112613	-0.443599	-0.446374	0.511475	0.72784	0.395633	0.823125	0.496705	-0.20355	1.4874	1.44087
A_23_P11262	1.14221	-0.409448	0.364802	1.29355	0.988766	0.381918	0.699945	0.537821	0.832271	0.306678
A_23_P112634	-0.00104972	-2.04848	-1.27578	-1.20083	1.17349	1.75004	0.591336	-0.2021	-0.137054	0.83596
A_23_P112646	-0.424667	-0.10304	-0.612448	0.151506	0.179725	0.238545	0.0386334	-0.386343	-0.856449	0.163965
A_23_P112652	0.87022	1.14004	0.370487	0.31691	0.0931522	-0.0325935	0.594867	0.57502	-0.00158478	0.226732
A_23_P112666	-0.512234	-0.0923967	-0.198174	-0.722337	-0.904973	-0.888771	-0.15841	0.113923	-0.588193	-1.26486
A_23_P112673	0.719419	0.223064	0.736697	0.902994	0.96695	0.180938	0.830605	1.61814	0.858859	0.538723
A_23_P112698	-0.576235	-0.506524	-0.131607	-0.593366	-0.0760375	-0.411508	-0.324468	-0.49707	0.319405	1.39455
A_23_P112726	0.543019	1.33965	-0.111286	0.825228	0.48914	1.13184	0.974323	1.34989	0.725679	1.13906
A_23_P112774	-2.64485	-1.17176	-0.59461	-0.80327	-2.47632	-2.20769	-2.24542	-2.32774	-1.9184	-1.62052
A_23_P11279	0.593009	-0.243786	-0.221661	1.59575	1.71918	0.933039	0.698191	1.10714	0.957023	0.885759
A_23_P112798	-0.536435	-1.23802	-0.847858	-0.954773	-1.20168	-0.662784	-1.30491	-0.605175	-1.36039	-2.03368
A_23_P112801	-0.340385	-0.607156	-1.29901	0.310741	-0.436977	0.407513	0.246845	0.122523	-0.656007	-0.466115
A_23_P112820	-1.82824	-0.932421	-1.09182	-1.61672	-1.96439	-2.12267	-2.1966	-1.9902	-2.09647	-1.61407
A_23_P112825	2.98972	0.997715	0.409618	-0.0433452	1.94659	2.07025	1.10805	1.5427	0.66431	0.950235
A_23_P112846	0.567267	-1.07846	-0.289598	-0.498978	0.932443	-0.1442	-0.617261	-0.632701	-0.13765	0.126642
A_23_P112859	-0.0556688	0.119803	-2.73883	-0.472984	0.120608	-0.618524	-0.215728	0.317511	0.0761416	-0.549194
A_23_P11286	0.987963	0.370718	0.274627	1.07251	1.01444	1.66499	1.00545	0.969145	0.626796	0.984265
A_23_P112874	0.458733	0.305305	0.563659	-0.67928	0.454227	0.197588	0.564888	0.477144	0.404265	0.390793
A_23_P112883	-0.549171	0.136699	-0.331215	-0.493761	-1.40844	-1.48275	0.109977	-1.24128	-0.83863	-0.550083
A_23_P112916	-0.48895	-0.773776	-0.355236	-1.45327	-0.885897	-0.628505	-0.631385	-0.228978	-0.334241	-0.274076
A_23_P112921	-0.460545	0.107974	0.00171813	-0.0276798	-0.763916	-0.486214	-0.0378056	-0.557429	-0.0930851	-0.149623
A_23_P11295	1.24713	0.16378	0.306899	1.32657	1.9435	0.0828658	0.457399	-0.00307683	0.375582	0.988743
A_23_P112950	-0.31341	0.221776	0.383429	-0.572054	0.196318	-0.900665	-1.2345	0.351594	-1.01767	-1.14622
A_23_P112957	-0.155909	-0.0135672	-0.124026	-0.384823	-0.332146	0.0344437	0.47959	-0.745709	-0.945789	-0.787928
A_23_P112982	1.96748	1.44652	0.729979	0.574714	1.25319	1.03998	1.78906	1.41194	0.961177	0.667062
A_23_P113005	-0.31693	-0.0205186	-0.850254	-0.240734	-0.471945	-0.654926	-0.634077	-0.580579	-0.463674	-0.91294
A_23_P113019	-0.47214	-0.0151227	-0.370986	0.257314	-0.937262	-0.0591498	-0.531318	-0.661692	-0.574626	-0.346597
A_23_P113026	0.904076	1.4241	0.239689	0.41996	2.09152	0.775752	0.576402	0.338985	1.14173	0.898384
A_23_P113034	0.00590339	0.330769	-0.286376	0.163375	0.186847	0.334032	0.19175	0.597037	1.3586	0.802238
A_23_P113056	-1.03979	-0.481197	-0.859674	-1.00828	-0.727644	-0.867975	-1.28391	-0.678089	-0.437151	-0.585314
A_23_P11309	-2.30568	-1.05798	-0.810451	-1.09466	-2.23315	-3.61846	-2.49774	-2.7294	-1.9423	-1.27411
A_23_P113101	-0.21095	-0.0618824	0.0247376	-0.0957944	0.0422932	0.27001	-0.733749	-0.137268	-0.445435	-0.633295
A_23_P113111	-2.2495	-3.55023	-6.21072	-8.10773	-4.76088	0.130168	-4.21187	-3.27004	-4.74619	-5.81148
A_23_P113161	0.157571	0.0264466	-1.09664	-0.355489	0.223408	0.175371	-0.18259	-0.591504	-0.00200214	0.106203
A_23_P113184	1.00608	0.420106	-1.55105	0.248084	1.20196	0.888942	1.09664	-0.222006	0.795269	1.06553
A_23_P113204	-1.08626	-0.897851	-1.01621	-1.67122	-1.62292	-1.28722	-1.27283	-1.39077	-1.11969	-1.03824
A_23_P113212	0.770705	1.0064	0.519118	1.22109	1.95139	0.781287	1.9682	1.8262	0.919761	1.04917
A_23_P113237	-0.725097	-0.328924	-0.295053	-0.804876	-0.52207	-0.548033	-0.239205	-0.484891	-0.868968	-0.623947
A_23_P113245	0.871958	-0.0522703	0.623252	1.57045	1.42022	1.86865	1.86674	1.5188	1.93939	1.77809
A_23_P113258	0.0512428	-0.00179087	0.245769	0.367607	-0.381718	-0.230333	0.243397	-0.671324	0.364415	-0.232754
A_23_P113263	-0.433338	-0.0613119	0.347166	-0.0212273	0.297903	-0.0263028	-0.278794	-0.513183	0.0650226	-0.181346
A_23_P113283	0.00232264	0.0311628	0.0967586	0.577752	-0.179771	-0.263794	-0.263365	0.38245	0.000702492	0.00810733
A_23_P11331	-0.0575621	-0.379165	-0.582245	0.60353	-0.0561211	-0.0875559	0.484636	0.588673	0.292895	0.58922
A_23_P113311	-2.30191	-1.72549	-3.4841	-2.63721	-2.86559	-0.33004	-3.06756	-2.45907	-1.99677	-2.49016
A_23_P113317	0.44618	0.0254018	-0.420235	-0.259084	-0.722959	-0.825614	-0.44958	-0.350244	-0.293432	0.136998
A_23_P113328	0.421712	0.526712	0.145256	-0.0697074	-0.825505	-0.922167	-0.455069	0.0714587	-0.26716	-0.77078
A_23_P113351	-5.98674	-3.44533	-4.04269	-2.98444	-3.73235	-2.03153	-5.27545	-3.63057	-2.80189	-3.93619
A_23_P113367	-0.487888	-0.488619	-0.35418	-0.520837	-0.873655	-0.77739	-0.777049	-0.616204	-0.59687	-0.661279
A_23_P113380	0.244531	0.227671	0.557096	-0.338535	-0.369612	-0.287551	0.0969906	0.800865	0.549611	-0.163734
A_23_P113382	0.165035	-0.220503	0.682747	0.23829	0.166505	-0.00247029	0.704819	0.484636	-0.514089	-0.270865
A_23_P113393	-0.430793	-1.02259	-1.07462	-0.531233	-0.874577	-0.42304	-1.39719	-0.314639	0.435519	0.394363
A_23_P113405	-2.4029	-0.12679	-0.0812701	-0.177137	-1.11084	-1.33415	-1.18433	-0.80751	-0.739522	-0.537591
A_23_P11341	-0.474231	-1.1567	-0.614724	0.535362	0.388223	-0.482127	-0.556325	-0.440898	-0.589358	0.192804
A_23_P113417	-0.827665	-0.482693	-0.615742	-0.444654	-0.609356	0.107294	-1.00514	-0.974145	0.603375	-0.6122
A_23_P113441	-0.376106	-0.0420285	-0.0736122	-0.225165	-0.885527	-0.870816	-0.247954	0.539831	-0.108263	-0.350213
A_23_P113453	0.119127	0.428804	0.535805	0.107621	0.234044	0.350631	-0.0163206	0.289522	0.293906	-0.0704788
A_23_P113462	-0.371044	0.250837	0.0648608	0.101503	-0.888506	-0.169172	-0.54487	-0.604419	-0.45696	0.652568
A_23_P113471	-0.531143	-1.61842	-1.63007	0.215075	0.511574	2.33016	0.037717	-0.0532758	0.464309	0.374583
A_23_P113523	-1.62793	-1.61271	-1.61882	-2.69896	-2.09063	-1.49247	-2.12924	-1.99577	-1.74505	-2.45057
A_23_P11353	-1.44972	0.00114023	-0.0713789	0.946719	-0.493131	-0.422074	-0.43183	-0.42508	-0.42405	0.222999
A_23_P113549	-0.239781	-0.612191	-0.108628	-0.240759	0.112223	-0.495385	-0.709393	-0.818084	-0.736933	-0.914913
A_23_P113553	-0.59963	-0.622615	-0.245584	-0.26665	-1.37242	-0.264365	-0.344441	-0.161884	-0.209721	-0.285723
A_23_P113570	-0.0855777	-0.218534	0.548797	0.281054	-0.236517	0.537647	0.206296	-0.277125	0.334139	0.319451
A_23_P113572	-2.63778	2.38985	1.72581	-1.42547	0.9376	0.688729	3.24141	1.09419	0.198537	2.26091
A_23_P113613	1.50547	-1.59109	-2.58397	2.94844	-2.07567	-0.436213	-3.34991	0.189186	-0.988815	-2.84482
A_23_P11362	-0.678011	0.0825552	0.0977273	-0.496791	0.230946	-0.688864	-0.401352	-0.447829	-0.142023	-0.053755
A_23_P113623	1.51041	-0.656502	0.710495	0.73968	2.33313	2.42592	2.22259	1.0747	2.14662	2.45619
A_23_P113634	1.0254	-0.0962926	0.718452	1.36209	2.37361	1.71498	1.48119	1.09052	1.56035	1.29797
A_23_P113645	-0.0222015	0.104287	0.0884319	0.156877	0.76894	0.525989	-0.152705	0.120953	0.447507	0.131611
A_23_P113656	-1.13006	-0.55174	-0.903577	-1.45301	-1.74425	-1.52033	-1.23366	-1.4486	-1.05011	-1.32008
A_23_P113682	-2.25689	-1.11693	-1.54018	-2.45239	-2.48872	-2.34644	-2.48152	-2.25854	-2.04653	-2.15109
A_23_P113692	-0.0111433	-0.390433	0.043469	0.333145	0.682076	-0.21272	0.618787	-0.352195	-0.221071	0.406685
A_23_P113701	-3.08451	-2.57235	-1.15639	0.206411	-2.55958	-0.578403	0.00678901	-0.687269	1.0522	1.2219
A_23_P113716	-0.0458809	-1.64848	-1.75291	0.781414	-0.905662	-0.707003	0.896823	0.113796	-1.37819	-0.863816
A_23_P11372	1.41335	0.18422	0.924764	1.93078	1.61384	0.828067	0.779211	0.639984	0.740545	1.94105
A_23_P113728	-0.093635	-0.153189	0.508416	0.0991813	-0.149515	-0.497091	0.193058	-0.00613161	-0.0357088	-0.460478
A_23_P113738	0.268113	0.34305	-0.0746304	-0.482359	-0.0466247	0.539206	-0.516779	0.757361	-0.249742	-1.07704
A_23_P113748	-0.0859919	0.460156	1.85194	0.289014	0.781739	0.649133	0.964998	0.206622	0.864044	-0.60679
A_23_P113762	-2.40646	-0.247736	-0.56726	-0.295192	-1.93171	-1.45895	-0.867095	-1.34331	-1.237	-1.09271
A_23_P113777	-0.762077	-1.70961	-0.365437	-0.0752725	0.395917	0.637706	0.289467	0.00414976	0.009877	0.226517
A_23_P113789	-0.185282	-6.75036e-05	0.432736	0.166483	-0.180817	-0.231253	0.0452412	0.107933	-0.255134	-0.714021
A_23_P113793	0.0940237	0.138482	-0.15431	-0.700381	0.133347	-0.978604	-0.212216	-0.424495	-1.1559	-0.518072
A_23_P113803	1.18166	0.48068	1.52925	1.17385	1.93785	1.74675	1.64903	1.76511	1.28218	1.00071
A_23_P113811	0.566878	0.499972	0.156977	0.754432	0.809326	-0.239441	0.307257	0.450598	1.92628	0.209798
A_23_P113825	0.958688	1.22099	0.361966	0.0217393	0.141161	0.213054	1.2014	2.06078	0.90248	0.73747
A_23_P113841	-0.382277	-0.268839	-0.262973	-0.417114	0.307924	-0.894294	-0.683805	-0.892732	0.863982	1.14454
A_23_P113888	0.349153	-0.927584	-0.693487	0.625419	0.170094	0.441983	0.046744	-0.387454	-0.100537	-0.534567
A_23_P11390	-2.66896	-1.82605	-0.504516	-3.07911	-2.15926	-2.213	-2.10545	-1.92294	-1.61973	-1.64554
A_23_P113952	-0.0587245	0.164564	0.188572	0.157012	0.130695	-0.361007	0.0725526	-0.0625561	-0.236139	0.618588
A_23_P113966	-0.0920418	-1.72159	-1.32944	-0.681588	0.855235	2.1138	0.58052	0.271281	0.809418	1.11515
A_23_P11397	-1.40429	-0.541482	-0.471993	-1.05047	-2.29079	-1.15653	-0.848262	-0.50915	-1.01098	-1.23918
A_23_P113972	0.658288	0.583163	0.247868	0.704572	1.33561	0.292141	0.584017	0.0253505	0.483278	0.752425
A_23_P113994	-0.594297	-0.532924	-0.251241	0.0608183	0.116197	-0.666571	-0.788486	-0.476579	-0.34643	-0.527015
A_23_P114008	-0.0474003	0.444707	-0.0866082	-0.107916	0.567073	-0.214818	0.0766409	-0.595622	0.818817	0.756103
A_23_P114048	-0.175668	-0.491246	0.121607	-0.0113133	-0.552043	0.0951311	0.286808	0.447475	0.0376625	0.315761
A_23_P114057	-1.79294	-0.742466	0.248116	-0.425106	0.941082	1.70975	-0.0290339	0.0451507	1.08028	0.337478
A_23_P114061	-0.583956	-0.0581142	-0.680258	-0.863489	-0.628042	-0.273728	-0.433865	-0.18533	-0.552995	-1.28198
A_23_P114075	-0.473887	-0.268297	-0.0849713	-1.10297	-0.312965	0.546012	-0.0174395	0.22706	0.580073	-0.734172
A_23_P11408	-0.859961	-0.479545	-0.450666	-0.426658	-0.474325	-0.916827	-0.940236	-0.656523	-0.75138	-0.682385
A_23_P114084	0.00959413	0.790792	0.381508	0.586029	0.143399	-0.359556	0.279639	0.612182	-0.120141	-0.696006
A_23_P114095	0.875857	0.978046	1.13844	1.14708	0.388839	0.300896	1.37855	0.468256	1.38355	1.10412
A_23_P114105	-0.86319	-0.29326	-0.283286	-0.49177	-0.797297	0.264746	0.0378849	-0.604532	-0.135582	-0.129817
A_23_P114118	-0.438137	-0.153371	-0.366382	-1.17276	-2.85202	-0.193987	-0.254686	-0.551679	-0.903418	-1.72587
A_23_P114134	-0.945169	-0.495616	-0.440296	-0.686231	-1.17781	-0.48709	-0.53131	-0.467766	-0.432964	-0.980259
A_23_P114144	-0.131058	-0.792177	-1.7173	0.291079	-0.498334	0.00943999	-0.407891	-0.415252	-1.18364	-0.465415
A_23_P114155	0.588433	0.112717	0.552778	1.82399	-0.140696	-0.405379	0.65	-0.329948	-0.54156	0.0308288
A_23_P114164	1.06765	-0.00808387	-0.135019	0.701863	1.33526	1.49921	1.09596	0.710633	1.44724	1.55135
A_23_P114172	-0.638647	-0.707857	-2.74952	-0.28259	0.711812	0.0709538	0.572389	0.61969	0.131037	0.370775
A_23_P114185	0.0940551	1.38939	0.275045	-0.284133	-0.621266	-0.810856	-0.798558	-0.108514	-0.457184	0.480922
A_23_P114210	-0.0489082	0.0784305	-0.286199	-0.628511	-0.700274	0.350971	0.91257	-0.19628	-0.663895	-0.355838
A_23_P114221	2.33438	0.788496	1.36991	1.72652	1.51694	1.19867	1.8058	1.47609	-0.0785551	1.05497
A_23_P114232	3.24559	2.05433	2.56876	3.2978	3.13583	0.66563	2.34472	1.95012	1.40556	1.61788
A_23_P114259	-0.657199	-0.35934	-0.150542	-0.337266	-0.360092	-0.596139	-0.128333	-0.899083	-0.256229	-0.198262
A_23_P114275	0.968217	3.8208	0.857554	0.102589	1.74812	0.562903	1.06442	0.57499	-0.363917	0.0766431
A_23_P114282	0.764582	0.334974	0.917683	1.46618	1.70856	1.18577	1.31944	1.32128	0.86051	1.67634
A_23_P114299	-1.38903	-1.21656	0.176579	0.0661605	-2.36509	-0.251001	-0.289183	-3.17506	-2.95691	-1.91451
A_23_P114307	-0.321163	0.532243	-0.188941	-0.0926199	-0.293877	-0.15539	-0.0304358	-0.580642	-0.19998	-0.662732
A_23_P114314	-1.156	-0.549144	-0.606689	-0.449435	-1.18873	-0.381316	-1.36988	-0.996732	-1.12781	-0.709805
A_23_P114349	2.29799	1.35896	1.62679	2.06452	1.81584	0.843754	1.84611	1.59498	2.47303	2.96803
A_23_P114353	0.799014	0.643989	0.276169	0.465638	-0.624941	-0.0980749	0.100077	1.19251	0.810291	-0.0475139
A_23_P114361	0.696125	0.395902	0.687459	0.910939	-0.45745	0.247184	-0.569237	0.116885	-0.708985	0.0455964
A_23_P114374	-0.365983	-0.0185211	0.131412	-0.10229	0.97326	-0.0645246	0.108025	-0.885127	-0.375117	-0.340421
A_23_P114381	-0.935643	-0.131801	0.0816038	0.036313	-3.17787	-2.46587	-2.62606	-2.45102	-1.90216	-1.65897
A_23_P114405	2.71932	-0.115295	0.369249	0.999563	0.959476	1.67438	2.3113	1.39819	1.44851	2.11604
A_23_P114414	-1.94185	-0.226746	0.111825	-0.435566	-1.59411	-1.56418	-1.13856	-1.17459	-0.64325	-1.38031
A_23_P114423	1.09987	2.51483	2.51881	3.38877	1.94051	0.16116	2.38823	3.33908	2.92744	1.76289
A_23_P114445	-3.17314	-1.83061	-1.29487	-1.33501	-2.20678	-2.37354	-2.27002	-2.36538	-2.13066	-1.64268
A_23_P114466	-0.234161	0.115388	0.21595	-0.0653195	1.26221	0.575972	-0.139638	0.342696	1.13192	-0.328661
A_23_P1145	0.258286	0.721183	-0.0201187	0.699329	0.337369	-0.490353	0.0315052	0.898979	0.222387	0.0444277
A_23_P114582	-1.30437	-0.441444	-0.554993	-0.721653	-1.42126	-1.0474	-1.13309	-0.967158	-0.798038	-0.803413
A_23_P114585	0.758281	0.541727	-0.93352	-0.354507	-0.347504	1.28246	-0.45107	-0.784456	-0.610888	0.0405478
A_23_P114597	-0.239559	0.369447	-0.0191532	-0.249219	-0.229172	-0.147224	0.14849	-0.30871	-0.270912	-0.345548
A_23_P11461	3.29838	-0.397058	1.26028	0.545755	1.46064	1.03666	2.15459	0.70486	1.05927	0.856977
A_23_P114616	-0.481468	-1.08737	-0.899037	0.0692823	0.920837	1.30518	0.471284	0.37598	0.40263	-1.31566
A_23_P114626	4.29466	3.25222	3.99301	3.90778	3.61671	4.29314	3.73896	3.66112	2.78714	2.18307
A_23_P114649	-1.09228	-0.574875	-0.811112	-0.868534	-1.36039	-1.3813	-1.08114	-1.09167	-1.17186	-0.882815
A_23_P114656	0.447137	0.210154	0.90319	0.0712549	0.866516	1.29369	0.904046	0.938276	0.371938	-0.521262
A_23_P114662	2.64691	1.27737	1.22597	2.04826	2.18966	2.86809	2.24324	1.46158	1.19241	1.98521
A_23_P114670	-1.8179	-1.02768	-1.14084	-2.16263	-2.04166	-2.44883	-2.50562	-1.82918	-1.0382	-1.28296
A_23_P114689	0.533653	-0.554027	-1.90588	-1.76412	-0.402923	0.664278	-0.994907	0.351326	0.0791815	-0.851659
A_23_P114707	-1.47753	-0.795148	-0.733886	-1.07476	-1.78786	-1.83228	-1.80197	-1.77906	-1.64084	-1.45099
A_23_P114713	-0.216456	-2.45072	-0.376515	0.104833	0.541144	-0.15554	-0.969422	-1.37798	-3.75324	-4.21653
A_23_P114736	-2.01797	-1.81855	-1.82009	-2.10438	-2.5637	-2.40384	-2.50903	-2.51507	-2.13582	-1.60859
A_23_P114740	-4.43864	-4.04825	-3.34454	0.00526605	-5.09338	-2.50047	-0.692225	-0.786606	-0.0375255	-0.325615
A_23_P114774	-0.682341	-1.29642	-2.60512	-1.43946	-1.05997	-1.28361	0.00486327	-1.56122	-1.31317	-1.51227
A_23_P114783	1.73856	-0.142042	0.132116	1.45057	1.27188	0.346996	0.641238	0.258408	0.355747	0.60767
A_23_P114808	-1.96747	0.108123	0.67413	0.912526	-1.80242	-1.69758	-1.25636	-1.13883	-0.634623	0.872275
A_23_P114814	0.297696	0.760065	0.464258	0.459686	1.60115	0.917265	0.172695	0.029561	-0.0190156	0.645829
A_23_P114826	2.80784	1.49426	1.60147	1.28547	2.12769	1.67324	0.953085	1.50516	0.829559	0.18394
A_23_P114839	-0.699211	-0.631802	-0.596647	-0.550284	-0.904048	-0.833832	-1.15065	-1.16063	-0.631527	-1.16504
A_23_P114857	0.283645	-0.0507561	-0.153435	0.0698398	-0.440873	-0.315816	-0.526467	-0.833651	-0.907448	0.0689015
A_23_P114862	-0.221818	0.126224	0.158985	0.261435	0.507728	-0.0426403	-0.673426	-0.0968441	-0.557215	0.311925
A_23_P114879	0.0693197	-0.122844	0.37232	-0.194854	1.25831	-0.172023	-0.352942	-0.620065	-0.699772	-0.207085
A_23_P114883	-5.43647	-6.87779	-8.71442	-2.05966	-5.00758	-3.23829	-5.5659	-2.77125	-6.57885	-5.59826
A_23_P114903	0.249221	-0.883708	-0.309409	-0.231215	-0.920752	-0.3636	-0.653823	-0.806181	-0.0840917	0.0310791
A_23_P114929	1.46441	0.527923	0.38087	-0.532612	2.10535	0.470393	2.18783	-0.7617	0.735648	1.29337
A_23_P114934	0.615189	-0.402045	-0.0813279	0.811026	1.73425	0.743551	1.21641	-0.143618	-0.44267	-0.241716
A_23_P114947	0.622087	-0.835881	0.267637	-0.248871	1.60076	-0.596151	1.11597	1.58487	1.56839	1.88197
A_23_P114952	-0.913374	-0.842071	-1.21058	0.589995	-0.916804	-2.16112	-0.149675	-2.03594	-0.890205	-1.84633
A_23_P114968	-0.778244	-0.415404	-0.602185	1.1585	-1.26187	-1.44573	-1.40646	-0.988451	-0.867573	-0.0380027
A_23_P114983	3.34641	3.5787	2.72046	3.65927	2.97599	3.02066	2.52111	2.51609	2.5245	2.71558
A_23_P115011	-0.0646967	-0.419228	0.314897	-0.609665	-0.61817	-0.312609	-0.407542	-0.149261	-0.134086	0.396259
A_23_P115021	-1.3227	-0.500038	0.636428	-0.175704	-0.804819	-2.4758	0.114209	0.287509	2.67658	-3.41466
A_23_P115022	-5.0551	-5.273	-6.39143	-5.09906	-4.35044	-5.33484	-4.35662	-4.11966	-5.18004	-5.76536
A_23_P115036	-0.394214	-0.442279	-0.176787	-0.27566	0.0106049	-0.0891344	-0.80759	-0.376407	-0.217942	-0.856536
A_23_P115046	0.225799	0.393153	0.2385	0.421138	0.324721	-0.108279	-0.00772592	-0.181021	0.316987	0.255444
A_23_P115052	-0.393699	0.551271	-0.0351723	0.307809	-0.380433	0.172928	0.0410441	0.203939	0.288394	0.564962
A_23_P115064	-1.79395	-1.71025	2.69979	-1.23446	-0.914401	-2.16597	-1.7218	-2.89701	-1.73274	0.313883
A_23_P11507	-0.0431799	-0.386563	0.0193674	0.425825	0.582165	1.17563	1.179	1.55825	0.80081	1.36343
A_23_P115091	-0.985821	-0.0591646	-1.02631	-0.415673	0.0951435	-1.14731	-0.485868	-1.12631	-1.30133	-1.83222
A_23_P115105	-1.00793	-0.0947149	0.114689	-0.415687	-0.769219	-1.07081	-1.02594	-0.819128	-1.18938	-0.145897
A_23_P115118	-2.65598	-2.42338	-1.1361	-2.99882	-2.41857	-1.68813	-1.3833	-1.45093	-0.87267	-1.63268
A_23_P115124	1.2898	0.830314	-0.410764	0.303032	0.913106	0.871844	1.48444	0.28176	0.965651	0.2891
A_23_P115137	2.12456	0.288905	1.2141	2.04338	2.45355	1.21486	2.79321	0.128666	1.11059	1.3438
A_23_P115149	1.71286	2.02297	0.578385	1.29269	3.04822	0.175308	1.86923	0.0541143	0.671769	1.04093
A_23_P115161	-1.44154	-0.760061	-0.433147	-2.21243	-3.10354	-1.08447	-1.76552	-1.31932	-1.60468	-1.48868
A_23_P115167	-0.89423	-0.543143	-0.380216	-0.514482	-0.967728	-0.564771	-0.988861	-1.24914	-1.09664	-0.407619
A_23_P115190	-1.51672	-0.788962	-0.385182	-2.03592	-1.90895	-1.93706	-1.71448	-1.45719	-1.18102	-1.57568
A_23_P115192	0.139218	-0.792038	-1.38474	-0.790382	-0.863931	-0.0593794	-0.968213	-0.114308	-0.659368	-0.455561
A_23_P115200	0.381933	0.128086	-0.0492764	-0.0857781	-0.0274685	-0.493916	-0.191384	-0.336081	0.333387	-0.323446
A_23_P115201	-0.127358	-1.07991	-0.662466	-0.117874	-0.644056	-0.466121	-0.147579	-1.01212	-0.887118	-0.0992047
A_23_P115202	-0.802997	-0.601324	-0.308202	-1.16393	-1.02929	-1.8076	-1.76317	-1.65571	-0.891093	-1.09834
A_23_P115215	1.61527	0.916932	0.737149	0.959486	0.846849	0.569212	1.32275	0.404251	0.732537	-0.501909
A_23_P115223	2.31478	0.911371	-0.232195	0.595916	0.100165	0.0390602	0.877812	-0.335537	-0.215168	-0.805888
A_23_P115246	-0.993538	-1.25875	-1.49099	-0.411493	-0.360152	0.257105	-0.91152	-0.253353	-0.888502	-0.739672
A_23_P115261	3.18615	2.99032	2.55696	6.20163	4.03282	5.32407	4.5349	4.57393	2.56393	1.37217
A_23_P115286	0.775707	-0.303233	-0.350672	0.407474	0.0267958	0.327439	0.415118	1.04446	0.339084	1.01438
A_23_P115313	0.748737	0.0584658	0.0934842	-1.00715	1.09977	0.278252	-0.130822	-0.351615	-0.398299	-0.195784
A_23_P115316	1.40225	0.670531	0.788401	0.0880521	2.51355	2.08849	1.93322	1.45796	0.486023	0.335432
A_23_P115331	-1.67754	-0.929316	-0.975388	-1.82941	-1.65225	-1.74825	-3.37307	-1.33445	-1.51408	-1.42411
A_23_P115346	0.59793	0.311014	0.321449	0.145743	0.544154	0.175148	-0.281065	0.0602415	0.663204	0.319826
A_23_P115356	0.192016	-0.230553	0.195347	1.13135	0.601512	1.17871	-0.0102044	-0.1859	-1.58842	0.760459
A_23_P115366	0.80588	0.332103	0.87116	0.793848	1.06373	1.00207	0.802976	0.903331	1.15479	0.350211
A_23_P115375	-0.650474	-0.196832	0.0688694	-0.000851337	0.0635837	-0.0792203	0.422919	0.0803973	-1.26498	-0.798596
A_23_P115407	-0.517899	-0.472968	-0.0356056	-1.38924	-0.506922	-0.958091	-1.11555	-1.19282	-1.19257	-1.04839
A_23_P115417	-1.01748	-0.92395	-0.640213	0.851489	-1.20809	0.382856	-0.0656039	1.07932	-0.56598	-0.707919
A_23_P11543	1.19797	0.368245	-1.99967	0.991631	-0.0254365	1.30373	0.899621	1.07389	-0.33656	1.25924
A_23_P115444	0.194895	0.0317112	-0.0695233	0.118738	-0.780891	0.175874	-0.499848	-0.579624	-0.736156	0.173711
A_23_P115460	2.92523	1.77859	1.75649	1.54138	3.369	2.53937	2.79795	2.90258	1.77568	1.86986
A_23_P115467	-0.335442	-0.0779033	-0.57819	-0.535575	-0.312105	-0.606242	-0.394483	0.191831	-0.00690809	-0.0176443
A_23_P115478	-0.796269	-0.0437218	-0.254655	-0.286585	-1.30601	-0.444243	-1.07427	-0.987144	0.0973425	-0.934528
A_23_P115482	4.52857	-0.10622	2.30369	1.73962	4.60194	2.44945	1.03454	2.53973	1.98601	2.71608
A_23_P115492	0.0650952	0.126478	0.197947	0.255308	0.0438499	-0.0617795	0.283582	0.549737	-0.185932	0.522758
A_23_P115519	-1.56513	-0.977592	-0.889832	-1.06146	-1.76627	-1.2759	-1.47202	-1.55231	-0.968574	-0.783337
A_23_P115523	0.472092	-0.258244	-0.295846	0.0390831	0.180769	0.114856	-0.506719	0.0907565	-0.616496	-0.589854
A_23_P115534	-0.214723	-0.136648	-0.170288	-0.0451824	-2.36732	-0.466941	-0.762739	-1.00135	-0.992688	-1.2919
A_23_P115563	-0.0573674	0.357514	-0.292785	-0.48651	-0.427817	-0.273757	-0.0738283	-0.503834	-0.341159	0.330035
A_23_P115573	-1.62788	-3.02904	-3.06796	-1.56983	-3.01196	-1.51701	-2.39502	-3.68301	-2.13742	-2.4997
A_23_P115597	0.385177	0.404109	-0.445325	0.552909	0.739678	1.95767	0.596204	1.25915	-0.0621155	1.23534
A_23_P115608	0.790096	1.184	0.529444	1.04305	0.569624	1.15678	2.85589	1.5482	1.03515	0.662025
A_23_P115616	-0.161351	-0.274103	-0.0352992	-0.208222	0.108205	-0.427665	-0.626128	-0.0341744	-0.436085	-1.03724
A_23_P115636	0.609965	0.188842	0.678991	0.588203	1.10683	0.371942	1.12551	0.583183	3.1147	0.866908
A_23_P11564	0.514636	0.322605	0.409136	0.535791	1.04146	-0.199713	-1.32184	-1.03265	-1.7833	-1.06635
A_23_P115645	-0.351661	-0.0999256	-0.120556	0.189196	-0.626843	0.168749	-0.343882	-1.70555	-0.498224	-0.118063
A_23_P115652	-0.953218	0.0496353	0.00792405	-0.52877	-0.985088	-0.224729	0.442047	0.416238	0.0437982	-0.0919351
A_23_P115683	-0.539764	-1.25356	-0.904425	-1.6521	0.589796	1.40644	0.615351	-0.45901	0.520643	0.0662907
A_23_P115699	-1.74958	-1.14071	-0.268626	-1.90601	-0.532203	-1.58451	-0.519209	-0.876828	0.755941	-0.593194
A_23_P115703	-0.0272788	0.509546	0.228637	0.162661	1.15753	0.0387251	0.954499	0.33473	-0.134416	0.674808
A_23_P115726	-0.985746	-0.544762	-0.561976	-1.12952	-0.944957	-1.45854	-1.25066	-1.25571	-1.18929	-0.961447
A_23_P115732	-0.550006	-1.87615	-2.31777	-1.80441	-0.319973	0.893677	0.547972	-0.0127409	-0.973061	-0.993166
A_23_P115743	-0.276321	-0.517198	-0.410144	-0.127619	-1.01807	0.74172	-0.719912	-0.957529	-1.07788	0.63775
A_23_P115762	0.909584	0.584625	0.70117	2.01355	-0.847199	0.65537	0.0239607	-0.359579	-1.54367	-0.845531
A_23_P115780	-2.25501	-0.55311	0.0428279	-0.257642	-2.83045	-2.2047	-2.20598	-2.37857	-1.69461	-1.02086
A_23_P115785	-0.599204	0.347867	-1.54465	-0.241297	-1.04426	0.202576	-0.134361	-1.42715	-1.86259	-1.31966
A_23_P115792	-1.18054	0.0354159	0.452521	0.321495	-0.897442	-0.673927	0.08651	-0.156687	-0.637052	-0.170602
A_23_P115805	-0.321467	0.425485	0.00860115	-0.232987	-0.438072	0.0183715	-0.611531	-0.494665	-0.55581	-0.0934817
A_23_P115824	0.544343	-0.575294	-0.219822	1.26329	1.45826	2.13175	2.23039	1.38062	1.567	1.48035
A_23_P115838	0.0062251	-0.358994	0.445083	0.669259	0.707561	0.897608	0.175906	0.473042	-0.32163	-0.180765
A_23_P115842	0.721713	0.166727	0.600904	0.507762	1.32507	1.10312	1.25837	0.482663	0.967788	2.0577
A_23_P115861	-0.487232	0.161079	0.0783192	0.148304	0.340326	0.478489	0.166698	-0.295637	0.688137	0.900255
A_23_P115862	-1.81019	-0.407999	-2.09197	-1.83636	-2.34375	-1.67515	-2.45145	-3.05996	-3.13226	-2.01834
A_23_P115872	3.01391	-0.244681	1.67705	0.109855	4.4372	0.762047	1.12732	1.67912	1.36441	1.97861
A_23_P115885	0.363917	0.531384	0.44261	0.863041	0.655386	0.516612	0.805312	0.663261	-0.160744	0.684061
A_23_P115902	0.285203	0.493841	-0.136064	0.034694	-0.161585	-0.225087	0.402772	-0.263036	0.31338	-0.437558
A_23_P115919	1.73756	0.905288	0.551531	2.21715	1.40668	1.83783	2.08288	2.79661	2.06956	0.830207
A_23_P115922	-0.258712	-0.604494	-0.571244	0.215157	0.202528	0.947373	0.424916	0.498524	-1.16185	-0.577687
A_23_P115932	0.118002	0.0339984	0.339846	0.244852	0.263348	-0.226328	0.219387	-0.680209	-0.356436	-0.286198
A_23_P115955	-0.00891843	0.538884	0.608672	0.0963861	1.01072	0.822058	1.15271	1.50216	0.611646	0.628259
A_23_P11598	0.302965	0.0151028	-0.0624227	-0.288573	0.661564	0.592341	1.80305	0.21253	0.711895	-0.071413
A_23_P115998	-0.313719	-0.133309	-0.215334	-0.775084	-0.711991	-0.344605	-0.254287	-0.184488	-0.900012	-0.717557
A_23_P116007	0.189353	-0.481744	-0.281413	-0.0520387	-0.505187	-0.558839	-0.564284	-1.24766	-0.731459	-1.10823
A_23_P116013	-0.937548	-0.663129	-0.0769167	-0.45291	-1.33193	-0.580217	-0.450897	-0.64917	-1.74104	-0.456408
A_23_P116016	0.2597	-0.144214	0.776389	1.61502	0.371432	0.203456	0.906051	0.705187	-0.0638342	-0.306441
A_23_P116025	-0.098948	-0.3501	-0.0697905	-0.0834249	0.513757	0.253488	0.367976	0.0961751	0.337372	0.0229294
A_23_P116037	0.548251	-0.168647	-0.756516	-1.22979	0.0770746	-0.527817	0.916799	0.196556	-0.798131	-0.0590814
A_23_P116081	-0.568025	-0.872044	-1.34363	-1.74489	-2.87411	-1.85929	-1.50534	-2.38961	-2.08303	-1.1567
A_23_P116091	-0.318948	-0.228137	-0.148897	-0.716438	0.104045	-0.110023	0.293676	-0.525619	-0.866229	-0.598211
A_23_P116114	-0.269816	-0.127463	0.00643612	-0.132153	0.380611	0.0353017	0.560752	-0.112318	0.211048	0.513947
A_23_P116123	5.40351	1.80643	3.746	1.3011	5.34325	1.6052	3.68647	3.01365	2.07053	2.39498
A_23_P116145	0.0226051	-0.0388594	-0.0671586	-0.672116	-0.663131	-1.35288	-0.142161	-1.13074	-0.25628	-0.446033
A_23_P116168	1.01424	0.498179	0.459555	0.391679	2.26269	0.609716	0.81945	1.19739	0.271957	0.729444
A_23_P116173	1.18856	1.22444	1.87395	0.88689	0.278315	0.723371	2.2857	1.86548	1.39103	2.3358
A_23_P116187	-0.735899	0.650672	0.735832	-0.406077	0.0923393	-0.105378	0.526065	0.814052	-0.402356	0.18186
A_23_P116195	-0.379835	-1.13835	-0.386273	-1.85526	0.415326	0.361676	0.490397	0.828353	-0.463294	-1.67966
A_23_P116207	1.91794	1.49858	1.58907	0.250921	1.72714	1.67034	1.49285	1.28071	1.20909	1.13651
A_23_P116235	-0.956093	1.1523	-0.895554	3.14742	-1.09833	-0.335141	-1.11005	-2.40443	0.911028	-2.49061
A_23_P116249	-0.650765	-0.438329	0.238802	-0.803371	0.299446	-0.553886	0.547208	0.353718	-0.746027	0.570415
A_23_P116259	-0.180926	0.0886301	-0.196579	-0.771537	-0.90231	-0.216543	-0.533226	-0.479455	-0.806741	-0.613665
A_23_P116264	-0.499623	-0.0946258	-0.208642	-0.391681	0.907338	0.471022	0.691716	1.24192	0.411382	-0.135022
A_23_P116280	-0.220609	0.351165	0.254408	0.0109693	0.134582	-0.0183193	-0.286824	-0.151847	0.107797	-0.322729
A_23_P116286	-0.597833	-0.640636	-0.603249	1.07884	0.190479	0.926049	0.545543	-0.867163	1.38155	0.752624
A_23_P11629	0.715241	0.257463	-0.219323	0.0627642	-0.0492512	-0.786602	0.432286	-1.42288	-0.31597	-2.2774
A_23_P116371	-0.190291	-0.211	-0.148314	-0.595534	-0.730776	-1.07778	-0.93438	-0.298601	0.142636	-0.453172
A_23_P116376	0.0515574	-0.335032	-0.190642	-0.372255	-1.04153	-0.657687	-0.114083	-0.290646	0.145985	-0.157425
A_23_P116387	1.97235	1.90101	1.24345	-1.48031	1.34313	-0.78019	-1.04811	-0.075037	-0.506478	0.330771
A_23_P116414	-1.98555	-0.519756	-2.21464	-1.21103	-1.40501	0.0619326	-2.04695	-2.20588	-3.89467	-2.82584
A_23_P116430	-0.126611	-0.126387	0.203431	-0.0442158	-0.0228624	-0.345816	0.16438	-0.346613	-0.887333	0.302811
A_23_P116435	-0.958105	-0.739111	-0.658627	-0.526178	-2.05869	-1.44462	-2.19887	-1.87263	-1.34352	-0.777312
A_23_P11644	-0.24552	0.208802	-0.266194	-0.0116058	-0.282226	-0.295658	-0.405353	-0.124675	-0.873657	-0.139047
A_23_P116473	0.229302	0.0394781	-0.408225	-0.456882	0.411761	-0.408453	0.220708	-0.623682	-0.68684	-0.700646
A_23_P116512	-0.266698	-0.84385	0.378027	0.189646	1.20548	0.950512	0.451036	0.454691	0.414357	0.885784
A_23_P11652	1.11313	0.190958	0.784006	0.979849	2.40052	-0.408324	0.974223	1.7664	2.04854	0.0331931
A_23_P116523	0.625655	-0.216169	-0.194247	-0.570449	-0.575781	-0.705014	-0.565867	-0.652428	-0.496634	-0.263984
A_23_P116533	0.871156	-0.115554	-0.548437	1.43846	1.56155	2.02881	1.34535	2.12887	0.803127	1.56997
A_23_P116557	-0.557632	-0.270761	-0.0627761	-0.585961	-0.706852	-0.64393	-0.331874	-0.446225	-1.56545	-0.507267
A_23_P116578	0.643772	0.594462	0.319739	0.788229	0.718865	0.358469	0.548221	1.09881	1.74199	0.53187
A_23_P116587	-0.170108	-0.0394683	-0.433925	-0.478885	-1.22049	-0.110976	-0.276959	-0.518531	-1.05314	-0.324047
A_23_P116602	-0.326994	-0.154209	-0.962285	-1.12524	-0.992544	-0.668021	-1.25771	-2.171	-1.74013	-1.29192
A_23_P116614	-1.49243	-1.83286	-2.55206	-4.05529	-1.67385	-0.572503	-1.99976	-4.91115	-0.339399	-2.81864
A_23_P116624	-0.587958	-0.283068	-0.286076	-0.395464	-0.569576	-1.2374	0.121911	-1.06144	-0.485392	-0.540177
A_23_P11664	1.87041	0.409947	0.477301	0.320256	1.94991	2.21275	2.30813	1.69332	1.40937	-1.37124
A_23_P116640	-0.395961	-0.253974	0.441404	-0.377593	0.150217	-0.219791	-0.288886	-0.205209	-0.159162	-0.335098
A_23_P116642	-0.229161	-0.339349	-0.239455	0.338638	-0.449156	-1.18156	-0.504531	-0.581557	-0.0699738	-0.358853
A_23_P116653	0.446872	-0.479257	0.255325	-0.285407	0.506295	-0.875248	-0.856314	-0.0181433	-0.176449	0.102731
A_23_P116679	-0.0880975	0.333422	0.207423	-0.26136	-0.301825	-0.045852	0.195238	-0.51121	0.393585	0.292259
A_23_P116682	-0.877398	-0.567899	-0.626565	-0.620341	-0.451296	-1.21064	-0.947217	-0.95385	-0.373644	0.31311
A_23_P116694	0.147519	0.716733	0.00503977	-1.70845	0.779754	0.489375	-0.705499	0.171652	-0.68297	-0.792072
A_23_P116712	-0.081138	-0.631337	-0.820288	-0.358519	-1.44263	-0.995007	-0.881751	-1.48744	0.130206	-0.504113
A_23_P11674	-0.529123	-0.315223	-0.108618	1.03429	-0.312368	-0.269344	0.150158	-0.164386	0.416738	0.167545
A_23_P116741	0.202299	0.740098	-0.0947566	-0.103868	-0.120012	-0.0985732	-0.297483	-0.015311	-0.418416	0.060045
A_23_P116743	-0.980682	0.316334	-0.697263	-0.443463	-1.04051	0.542422	-1.75167	-0.512601	-0.00366731	-0.332965
A_23_P116765	0.650742	-0.218718	0.208962	-0.303881	-0.301974	-0.0101597	-0.383212	-0.230755	-0.261272	-0.0151947
A_23_P116797	-0.443391	-0.0457716	-0.543737	-0.993143	-0.879451	-0.873325	-1.20277	-1.28822	-0.707647	-0.8373
A_23_P116809	0.000893884	-0.0581931	-0.291534	0.0115618	-0.593684	0.23907	0.40261	0.616529	0.996061	0.80944
A_23_P116829	0.646743	0.681716	0.768334	0.65211	1.04014	0.419291	0.197245	0.809124	0.0479139	0.436847
A_23_P116840	-1.63404	0.402164	0.425855	-0.583388	-0.101508	-0.988997	0.0987	0.0556146	0.0680928	0.779363
A_23_P11685	4.05576	3.58077	2.66235	3.82684	2.48326	2.85575	5.98716	2.92484	3.06345	4.03422
A_23_P116850	0.0439176	0.296085	0.215792	-0.322387	-0.653523	-0.591354	-0.644072	-0.153923	-0.247647	0.142431
A_23_P116868	-0.00036815	-0.115649	0.333897	-0.493163	-0.981951	-0.509456	-0.0483131	-0.216579	-0.658007	0.424472
A_23_P116872	-1.58307	-0.738919	-1.15422	-1.352	-2.74318	-1.86207	-2.09111	-2.31351	-1.76531	-1.92684
A_23_P116890	-1.0586	-0.436842	-0.609508	-1.09325	-2.1286	-1.56162	-1.67858	-1.64874	-1.39672	-1.67675
A_23_P116898	0.961733	0.960555	-0.314129	2.00858	2.50672	2.61979	1.68507	3.41247	1.8249	3.60548
A_23_P116902	0.0773994	0.262464	0.35998	-1.05031	-0.0418202	0.485065	-0.0942462	1.09794	-0.114395	0.887666
A_23_P116913	-0.137196	0.364782	0.438835	0.232803	-0.212909	0.274121	0.907916	0.973032	0.585897	0.546612
A_23_P116942	-0.79917	-0.0408274	-0.549997	-1.46154	-2.92228	-1.89461	-3.75063	0.886642	-1.40444	-0.433326
A_23_P11697	-0.991639	-0.520263	-0.0865125	-1.67108	-0.00660926	-1.19636	-0.809034	-0.00988017	0.61038	-0.43646
A_23_P116980	-0.330468	-0.599275	0.186469	-0.537766	-0.644875	-0.12447	-1.19926	-0.982564	-0.208394	-0.0480792
A_23_P116999	1.1853	0.735533	0.972922	1.1707	2.10503	1.81249	2.47907	2.36507	2.10747	1.28389
A_23_P1170	0.338139	0.646504	-0.83308	0.314869	-0.450242	1.52295	-1.73698	0.363133	-0.0248917	0.172561
A_23_P117037	2.83894	1.71457	1.09837	1.95335	2.1517	2.6665	1.99853	2.59129	1.78399	2.20415
A_23_P11705	-1.77728	-0.425974	-1.03228	-0.655809	0.0265131	-0.271893	-1.11169	-0.959889	-0.796132	-1.80498
A_23_P117059	0.0374012	-0.623719	0.373364	0.307782	-0.883006	-0.0188321	0.0869797	-0.211757	-0.144322	0.311594
A_23_P117068	1.92225	0.943662	2.73968	0.541864	2.68821	1.64342	0.844888	1.56094	1.82565	1.39115
A_23_P117082	-1.10552	-0.581148	-0.201392	-1.02711	-2.71783	-0.20767	-1.12065	-2.76159	0.409363	-0.105765
A_23_P117095	1.16	-0.394836	0.734609	0.121207	0.835764	1.66536	0.0282194	0.761325	0.178209	0.633777
A_23_P117104	-0.42504	-0.139325	-0.0235407	-0.857314	0.130892	-4.87633	-0.503726	-0.567604	-0.344355	-4.53654
A_23_P117125	-0.567998	-0.129191	-0.635996	-0.675784	-0.552761	-0.474089	-0.699982	-0.554554	-1.02496	-1.01569
A_23_P11713	1.18318	0.881554	1.06587	1.75575	1.29817	1.86609	1.43491	1.59525	1.09309	0.565721
A_23_P117146	-0.605037	-0.414021	-0.0712873	-1.0997	-0.102597	-0.279205	-0.206559	-0.218982	0.663668	0.379525
A_23_P117157	0.886953	0.812301	1.11074	0.951275	2.04915	2.13841	0.264919	0.953423	1.12896	0.981317
A_23_P117163	0.467875	-0.303133	-0.103001	0.558752	0.917392	0.822335	0.32654	0.765358	1.10494	0.456333
A_23_P117175	1.54959	1.49602	1.70563	1.90204	2.41695	1.71962	2.8123	2.36433	2.18034	1.51472
A_23_P117190	0.629366	-0.452708	0.722922	0.739891	0.587977	2.51204	-0.542247	0.987985	-0.414041	-1.09544
A_23_P117198	-0.944503	-0.766665	0.109686	-0.966541	0.0669725	0.710548	0.54175	0.209075	-0.992145	-0.0649504
A_23_P117225	-0.516766	0.314096	0.182591	-0.346862	1.27802	0.883149	2.07998	1.06713	1.24085	0.396153
A_23_P117238	-0.283091	0.874518	-0.312503	-0.0402274	-0.312353	-0.630099	0.343142	0.247117	-0.64477	-0.209417
A_23_P117242	0.00165904	-0.112923	-0.197381	-0.390713	0.111552	-0.156059	-0.314928	0.372526	0.125122	-0.0344244
A_23_P117261	-0.103964	-0.362276	-0.305113	-0.407582	-0.472958	-0.528645	-0.535369	0.233818	-0.0862554	-0.383554
A_23_P117274	1.30639	0.920727	0.922926	1.36274	0.966339	1.97564	1.68511	1.02092	1.42842	1.28968
A_23_P117286	-0.342069	-0.787666	-2.31081	1.11493	-0.394734	0.441421	0.756489	0.660135	0.28841	1.07357
A_23_P11729	-0.861288	-0.785547	-0.76517	-0.907637	-1.71703	-1.14265	-1.24896	-1.50721	-1.24724	-0.606288
A_23_P117298	1.11535	0.805104	0.219402	-0.167753	0.448531	1.19147	0.901563	0.340451	-0.484754	0.649551
A_23_P1173	-0.333801	-0.319495	-0.691345	-0.514561	-0.362941	-0.713142	-0.381558	-0.195673	-0.353263	-0.734104
A_23_P117302	-0.250253	-0.0318041	0.346801	-0.065441	0.216436	-0.491734	-0.618451	-0.363457	-0.272365	-0.551243
A_23_P117346	-0.341393	-0.206111	-0.292617	1.03107	0.354232	1.08468	1.05038	1.50312	1.06421	0.884978
A_23_P117363	1.25441	2.67238	-4.73694	0.268689	1.00032	0.23573	0.695742	0.922701	-2.03993	1.3227
A_23_P117380	-0.941362	-0.7342	-0.848519	-0.749547	-1.12329	-1.44235	-1.15711	-1.32961	-0.991516	-1.076
A_23_P117387	0.779018	0.0909641	0.0870789	0.0562976	0.40934	0.39108	0.39384	0.0407302	0.197331	0.207056
A_23_P11739	-2.24435	-1.01227	-0.453726	-0.674011	-2.74704	-1.9468	-2.00539	-2.16579	-1.77549	-2.46862
A_23_P117411	-0.29091	-0.376547	-0.212109	-0.272916	-0.60046	-0.241364	0.0143111	-0.713462	0.229233	-0.151316
A_23_P117416	-2.15581	-0.527965	-0.244625	-0.412815	-2.67873	-2.36235	-2.30071	-2.26421	-1.67299	-0.721828
A_23_P11742	-1.10578	-0.656696	-0.784973	-2.55128	-1.61941	-0.604803	-1.86506	-1.92587	-1.23299	-1.28126
A_23_P117424	0.462227	0.217126	0.23845	-0.00932977	0.0144849	1.16149	0.717389	0.565988	-0.274869	-0.0791625
A_23_P117437	0.609522	0.716277	-0.12	0.65199	-0.24235	-0.596941	-1.09277	-0.259328	-0.313344	0.332173
A_23_P11744	-0.47199	0.132646	-0.439968	-3.43597	-0.928449	0.475201	-1.17077	-1.47582	-0.0457098	-0.908461
A_23_P117447	1.06797	0.776023	0.402274	2.81042	1.89712	0.707673	0.965215	1.18635	0.626272	1.24338
A_23_P117464	-0.104823	0.188502	0.233964	0.199985	0.22098	-0.0979843	-0.809301	0.545989	0.0880113	0.394542
A_23_P117480	-0.814186	-0.350307	-0.514911	-0.224521	0.36139	-0.058438	-0.445931	-0.656621	0.366823	-0.424296
A_23_P117494	2.92197	1.47043	1.6604	2.34722	2.63084	2.19313	2.03545	2.15542	1.69776	1.9441
A_23_P117506	1.75542	0.581552	-0.418577	1.11127	0.814226	1.62747	1.57898	1.54189	1.26928	1.4742
A_23_P117515	-0.0788477	0.572696	0.569313	-0.236955	-0.541559	0.0124123	-0.832052	-0.0447864	-0.35356	-0.105757
A_23_P11752	-1.01616	-0.429376	-0.526732	-0.594893	-1.4865	-1.90066	-1.49263	-1.79493	-1.19234	-0.819885
A_23_P117527	0.885592	1.08403	0.438444	1.13427	1.16281	1.39314	2.39048	1.45446	1.22337	0.7454
A_23_P117540	0.251809	0.258548	0.613303	0.3629	0.237998	0.250141	0.152746	0.213323	0.0696898	0.382593
A_23_P117546	0.454346	0.333745	0.372501	-0.299885	0.839246	1.14784	-0.0831327	0.0434255	0.317444	0.26829
A_23_P117558	1.19838	0.593398	0.858159	1.79724	2.58889	1.8779	1.08987	0.642674	1.64522	2.58229
A_23_P117580	-2.02835	-0.560259	-0.0453392	-0.24894	-2.88763	-2.11529	-2.12338	-2.39285	-1.75749	-1.21222
A_23_P117582	-2.42654	-2.7749	-1.55576	-1.5913	-2.52226	-1.83488	-2.11096	-0.692856	-2.168	-2.89924
A_23_P117599	1.56212	2.09639	1.5543	2.0814	1.17751	1.11334	0.702684	1.80463	1.06904	1.40495
A_23_P117602	-0.885993	-1.06794	-0.652562	-0.919352	-2.63427	-1.98647	-1.95424	-2.18609	-1.74411	-2.37535
A_23_P117623	1.76554	0.551999	1.86726	2.14075	1.47966	0.280478	0.868109	2.68884	-0.0407475	0.0115344
A_23_P117635	0.0302677	0.308586	0.70491	0.228652	-0.584087	-0.175377	0.154594	-0.462683	0.573613	-0.00653409
A_23_P11764	-0.98068	-0.803636	-0.340997	0.497328	-0.00495802	0.0782388	0.314523	-0.281215	-0.390371	-1.25016
A_23_P117654	0.614666	-0.00130759	0.715942	0.747214	1.00603	0.432711	0.427568	1.86274	1.1308	0.682013
A_23_P117662	-4.18664	-2.17554	-4.64818	-1.11198	-5.59976	-1.53929	-3.91795	-3.98587	-0.856653	-3.69108
A_23_P117679	-0.21905	-0.0840027	-0.209644	0.110372	-1.28594	0.109816	-0.380245	0.0515914	0.111457	-0.893428
A_23_P117683	0.501528	0.835022	0.223946	0.43691	0.147592	0.640845	0.634647	0.235759	-0.629711	-0.571617
A_23_P117694	-0.547854	0.41851	0.566872	-0.19846	0.758847	-0.111626	0.671313	0.600198	0.900821	0.157186
A_23_P117721	3.42296	2.8467	2.47426	2.59858	2.83192	2.39179	3.73829	3.24284	1.06379	1.34973
A_23_P117727	0.974142	0.513417	1.21056	1.34456	1.7968	0.287982	1.48623	1.8984	1.40973	0.586506
A_23_P117734	0.567017	0.457313	-0.165859	0.799127	0.414596	-0.80279	0.730559	-0.489159	0.451496	-0.18378
A_23_P11774	1.39505	0.76922	1.52158	1.50561	2.14544	1.40817	1.87366	1.2508	1.23468	-0.387676
A_23_P117743	-0.258741	0.667755	0.0716613	0.757154	0.60019	0.181293	1.30358	0.81056	0.878331	0.529104
A_23_P117759	-0.361612	-0.13554	-0.0124311	0.185515	-1.23435	-0.345115	-0.503479	-0.5434	0.177606	-0.405645
A_23_P117767	-0.0309376	0.182494	0.356975	0.407138	0.736701	0.0759128	0.00891017	1.45189	0.690871	0.821038
A_23_P117778	0.509761	0.959931	1.04394	-0.715116	0.668786	0.951344	0.805511	0.790665	0.365909	-0.327829
A_23_P117782	0.602666	0.449599	1.53772	3.48515	-0.656776	0.328367	1.18807	1.10709	1.26756	0.839533
A_23_P117797	-0.740918	-0.540451	-1.07012	-0.359071	-0.45571	-0.453416	-0.0272787	0.519386	-2.933	-1.43052
A_23_P117805	-1.39542	-0.556325	-0.510161	-1.16656	-1.78062	-1.78835	-1.49384	-1.49103	-0.583806	-1.62446
A_23_P117828	0.169208	0.46997	-0.320081	-0.3071	0.148718	0.611726	-0.574964	-0.284366	0.836299	0.451766
A_23_P117833	-0.0758405	-0.961591	-0.238665	0.110633	0.50936	-0.316576	-0.718774	0.375397	-0.225206	-0.169016
A_23_P117851	0.0142471	0.634143	0.287388	-0.0204084	1.10552	-0.11316	1.13673	0.369566	0.955612	0.0613798
A_23_P117852	4.40227	0.640944	2.46424	2.34021	5.55367	3.09464	3.10547	2.97443	1.98329	2.31511
A_23_P117862	-0.0704158	-0.25324	-0.530063	0.869695	-1.38051	-1.1168	0.289512	-0.734629	-1.14332	-1.08682
A_23_P11787	-0.987406	-1.85125	-2.25539	-0.671366	-1.84023	-1.13878	-2.04774	-5.98943	-0.624473	0.258692
A_23_P117873	-0.718707	-0.267939	-0.133107	-0.0370617	-0.448238	-0.361393	0.146217	-0.603816	0.174604	-0.259149
A_23_P117882	-0.551564	0.239243	0.38311	-0.339035	-0.650121	-1.71143	-0.0792563	-0.502573	-0.587317	-2.38495
A_23_P117896	-1.53536	-0.538803	-0.604334	-1.61775	-1.05695	-0.442125	-0.509326	-0.322078	-0.754379	-0.878641
A_23_P117912	-0.729135	-0.257661	-0.272002	-0.871616	-0.775038	-0.565074	-0.529312	-0.0473172	-0.905775	-0.484333
A_23_P117928	0.617774	-0.0772673	-0.768605	-0.668633	1.18988	1.63037	0.961607	0.51242	0.16574	0.198038
A_23_P117933	1.53593	1.56382	2.81378	1.34386	1.99927	1.24981	1.49713	0.221607	1.09668	0.773697
A_23_P117943	1.03679	0.3736	0.682933	0.0541236	0.438655	0.242635	0.349522	0.534581	0.814613	0.443966
A_23_P117955	1.44333	1.19453	0.766321	-1.04667	0.663424	1.1101	-0.0554457	-1.61471	-0.870341	-1.63843
A_23_P117971	-0.503174	0.735845	0.368479	0.203115	-0.0526021	0.23318	-0.185063	-0.111791	0.233721	0.0679023
A_23_P117980	-0.548052	-0.358743	-0.124788	-0.500028	-0.74501	-0.976214	-0.694458	-0.696403	-0.805471	-0.418292
A_23_P117992	-1.45992	-2.67567	-2.34759	-1.82395	-2.45961	-1.97081	-2.50721	-2.68696	-1.49634	0.0445985
A_23_P118	-0.323287	0.0701612	-0.174505	0.341461	-0.465312	-0.182255	0.103471	0.644055	-0.612898	-0.173137
A_23_P11800	1.52076	0.660781	2.06117	1.92441	1.31657	1.50471	1.67402	0.841618	-0.0942759	3.45799
A_23_P118002	0.177147	0.393318	-0.196113	0.814852	0.237009	0.789903	0.564947	0.779993	2.58293	0.709537
A_23_P118018	-0.0728354	0.230926	0.0346817	-0.19019	0.476328	-0.188253	-0.0386543	-0.584533	0.519924	-0.0291027
A_23_P118025	-0.0269057	0.0331928	-0.712528	-0.110636	-0.552581	0.107482	-0.307589	-0.388016	1.11774	-0.514395
A_23_P118038	-0.901995	0.192639	0.12889	-0.925109	-0.92445	-1.03757	-0.768963	-1.24327	-1.20335	-1.04727
A_23_P118042	-0.275015	1.0092	-0.878513	-0.44803	-0.452561	-0.775248	-0.016385	1.70452	1.66391	0.549205
A_23_P11806	-1.24855	-1.88537	-3.40968	-2.49454	-0.435736	-1.48283	-1.04657	-0.588967	-1.12767	-0.949409
A_23_P118061	1.63655	0.473488	0.673455	1.29518	1.44641	1.24279	1.69306	0.927886	1.72997	1.37201
A_23_P118065	2.09884	2.81544	2.01829	2.49061	3.52153	1.65217	2.28202	2.2442	1.89647	0.630623
A_23_P118086	-1.83339	-0.822164	-0.826248	-1.17504	-1.72106	-1.6065	-1.63813	-1.66879	-1.87311	-1.24538
A_23_P118095	-1.1649	-0.647288	-0.596815	-0.891787	-0.89719	-1.16506	-1.08544	-1.02405	-1.06217	-0.919466
A_23_P118105	2.3832	1.18399	0.0217489	0.147912	1.35307	1.44352	1.74591	0.996021	0.321035	0.955521
A_23_P118113	-0.172589	-0.428643	-0.152493	-0.336626	0.0567998	-0.349111	-0.392824	-0.153756	-1.15738	-0.400375
A_23_P118122	-0.770374	-2.72798	-2.25345	-0.647807	-5.60447	-2.92607	-2.26245	-4.26292	-1.12856	-3.50801
A_23_P118135	-0.195589	0.192386	-0.166201	-0.0335789	-0.305622	-0.23039	-0.287178	0.41921	0.717269	-0.0768301
A_23_P118150	0.828475	0.511465	1.29809	0.164309	0.119636	0.0764288	0.314986	0.0876053	0.342548	-0.185031
A_23_P118158	-0.272112	0.190723	-0.0377879	-0.816083	-0.335089	-0.264437	-0.158943	-0.733005	-0.255256	-0.235069
A_23_P118174	-0.460677	-0.200805	-0.0192511	-0.395221	-0.257962	-0.40639	-0.327278	-0.529019	-0.602765	-0.396026
A_23_P118185	2.19324	0.187782	1.02923	0.646791	2.67396	1.50069	1.28888	1.12127	-0.47238	1.48755
A_23_P118195	-0.10426	-0.21078	0.0824937	0.295891	-0.132336	-0.0782406	-0.28192	0.868194	-0.992753	-0.251744
A_23_P118203	-2.4763	-3.31609	-6.09868	-3.22732	-4.53337	-2.94705	-3.25213	-3.18258	-5.98457	-4.76739
A_23_P118234	0.0345395	1.83018	0.0343474	0.0312353	0.389185	-0.144338	-0.0831345	-0.355499	-0.686979	-0.180147
A_23_P118246	-0.0954139	1.5278	2.10897	1.19069	2.34719	1.19716	0.810574	-1.54591	0.937974	3.19873
A_23_P118254	-0.32368	0.384609	0.359405	-0.0589616	-0.0807112	0.268719	0.836389	0.713371	0.449434	0.252725
A_23_P118266	-1.69913	-1.33669	-0.502044	-1.42648	0.0562326	1.85435	0.191976	0.208442	0.929469	1.00169
A_23_P118289	-0.920057	0.0607485	-0.485326	-0.565938	-0.0678584	-0.0531984	-0.129293	0.0657742	-0.27188	-0.0980186
A_23_P118300	1.32847	0.512964	0.362704	0.775845	0.390287	0.382802	0.132945	-0.048711	1.03268	1.13458
A_23_P118306	0.966697	0.772336	1.00927	0.8529	1.24245	1.77039	0.716093	1.15227	1.86782	0.756549
A_23_P118313	-0.119782	0.291131	0.849355	1.21798	0.975111	1.13846	1.26924	0.128536	1.36159	2.08498
A_23_P118327	-0.236791	-0.0805062	0.0566732	-0.453814	-0.279738	0.30825	0.838281	0.290325	-0.200814	0.365091
A_23_P118334	0.218027	-0.884428	0.0616405	0.17189	1.19675	-0.748881	-0.517713	-0.831252	-0.077846	-0.159136
A_23_P118353	0.29868	0.3378	0.361657	-0.0544643	-0.3612	0.352568	-0.223143	0.373051	-0.348895	-0.271513
A_23_P118370	-0.922596	-0.770763	-0.385883	-0.865384	-1.14285	-0.899541	-0.996637	-1.28446	-0.843919	-0.911919
A_23_P118392	-1.24633	-0.404942	-2.74145	2.46924	-0.284897	-1.37711	0.844259	1.64964	-0.678486	-1.52949
A_23_P118406	0.268043	-0.204712	-0.961941	-0.0395506	0.117935	0.0938311	0.248489	-0.263893	0.0364359	0.300014
A_23_P11841	-0.290067	-0.20687	-0.193568	0.216794	-0.506923	-0.702885	-0.637187	-0.0908153	-0.122078	-0.507837
A_23_P118412	-0.382767	-0.473899	-0.610631	-0.42288	-1.2403	-0.863055	-0.503262	-0.543913	-1.14311	-0.607776
A_23_P118427	-0.473605	0.0969344	-0.431002	-0.111007	-0.518929	-0.386288	-0.294929	-0.415951	-0.133349	-0.287889
A_23_P11843	-1.66166	-0.649299	-4.4327	-0.75033	-2.41208	-1.96834	-4.36229	-3.80257	-0.648531	-2.58337
A_23_P118435	2.05263	0.635941	1.40203	1.68014	2.24456	0.952412	1.64578	1.50839	1.02196	0.844391
A_23_P118451	-1.17151	-0.632443	-0.606287	-0.859068	-2.14915	-2.13119	-2.24707	-2.07219	-1.68144	-1.42276
A_23_P118462	0.30496	0.118853	0.51778	0.390732	0.990576	0.800986	0.500238	0.728296	0.507592	0.473919
A_23_P118493	0.0889289	-0.99922	0.475415	1.07673	2.3107	1.44613	0.861582	0.0140388	1.13188	1.46021
A_23_P118516	0.838163	-0.0133803	0.67872	1.09377	1.06963	1.16297	0.33191	1.12734	2.05109	1.19116
A_23_P118536	-0.216449	0.226152	-0.0892422	0.543892	0.574332	0.404314	1.21032	0.57316	0.529981	-0.314282
A_23_P118544	0.100921	-1.64455	-0.478701	0.0972041	2.28843	2.01862	1.51822	0.807525	1.99513	1.95016
A_23_P118552	-0.583367	-1.41011	-1.46059	-1.35525	-0.79195	0.204936	-0.237003	-1.41233	0.438098	0.241498
A_23_P118571	1.03161	-0.00147124	0.0796208	-0.0696809	0.224034	-0.196401	-0.35373	-0.321075	0.501857	-0.024078
A_23_P118581	-0.387882	0.140688	-0.138651	-0.129839	-0.807267	-0.363975	-0.55284	-0.0384773	-0.451482	-0.562271
A_23_P11859	0.0335877	0.292902	-0.247863	0.863878	0.633008	-0.190328	-0.698952	0.865662	0.138257	0.347197
A_23_P1186	0.493541	0.341059	0.126659	1.55529	0.663751	0.091614	0.312555	0.928972	-0.299488	-0.393335
A_23_P118607	1.4354	0.339058	0.873584	0.367507	0.788302	1.47521	0.444097	1.18801	1.67281	1.27404
A_23_P118615	-0.601759	0.658614	1.15146	1.26561	-1.35079	0.510492	-0.418309	-0.313432	-0.767442	-0.394457
A_23_P11862	1.76654	0.865751	0.875137	0.537506	1.7561	0.453552	0.507358	0.50399	0.578216	0.0446198
A_23_P118633	-0.98818	-0.638033	-0.400844	-0.774591	-1.23494	-0.37388	-0.810493	-1.61071	-0.647788	-1.07733
A_23_P118643	0.140972	-1.14335	0.0528369	-0.450143	-0.125764	-0.204071	-0.904312	-1.19272	-0.685227	0.645898
A_23_P118649	-0.0649197	1.12964	0.791137	0.340665	0.553279	0.0215468	1.45681	0.49168	0.561722	1.03653
A_23_P118660	0.590739	0.145295	0.785346	1.06093	0.322158	0.768639	0.196604	-0.81066	0.680873	1.09979
A_23_P118675	-0.88343	-0.307056	-0.0536016	-1.89461	-0.870231	-0.47622	-1.323	-0.527	-0.0124352	-0.686062
A_23_P118690	1.25813	0.380241	0.85878	0.810276	3.93381	2.27745	1.74698	1.89504	1.32424	1.4732
A_23_P118693	-0.886183	-0.240623	-0.549141	-0.74322	-0.155362	-0.231703	-0.984896	-1.0747	-0.986577	-0.574461
A_23_P118705	-0.997899	-1.54165	-0.994118	-0.0464592	-0.291978	0.0562454	0.201402	-0.698549	-0.683043	0.41159
A_23_P118712	0.40192	0.736121	0.32714	-0.0508733	0.445874	0.16131	-0.0701873	0.766126	0.0769742	0.442855
A_23_P118722	5.01066	5.29558	5.91278	4.75334	3.86634	3.36113	3.91575	5.85937	6.43451	6.00516
A_23_P11874	0.397444	0.251729	0.0480601	0.0720876	1.12515	0.537282	0.0573907	-0.576994	0.757451	0.106459
A_23_P118741	-0.434084	-0.199649	-0.422952	-0.205688	0.0519867	0.205679	-0.381494	-0.101866	-0.37615	-0.774353
A_23_P118749	1.41552	-0.62667	-0.0436181	0.797883	0.937609	1.65729	1.87866	1.17647	0.104711	0.81982
A_23_P118774	0.31941	0.212116	0.150358	0.190576	0.624533	0.407784	-0.240863	0.239913	0.170424	0.621796
A_23_P118791	1.30137	0.13988	-0.267093	0.607729	0.899733	1.46398	1.45633	2.70794	1.55499	0.964941
A_23_P118815	3.73604	0.393241	3.28802	-0.0276878	6.02823	0.551579	0.508314	1.21272	2.03141	2.24439
A_23_P118834	1.39097	2.33428	1.29873	2.09917	2.52902	1.0286	1.47521	1.86266	1.45772	1.31563
A_23_P118842	0.954019	0.984203	1.47055	1.06776	1.56022	1.54074	1.78165	1.83198	0.799086	1.87879
A_23_P118854	-0.463467	-2.17135	-0.358837	-0.260391	-3.30171	-0.529815	-2.35341	-3.99494	-1.211	-0.26566
A_23_P118888	-2.04142	-0.278512	0.601799	0.950959	-2.04192	-1.47714	-1.22084	-1.30105	-0.402226	0.701265
A_23_P118894	0.928714	-2.92041	-1.40928	-2.25168	-1.20409	0.473899	-3.74858	-4.52442	-1.36763	-1.76836
A_23_P118909	3.11026	1.68113	2.4325	3.07462	1.45791	1.01544	1.35671	2.42378	1.24751	1.54916
A_23_P118916	-0.156586	-0.175199	0.0547522	0.025919	0.495739	0.0460247	0.0937779	0.796365	0.67287	0.0283434
A_23_P118946	-0.0491374	-0.477485	-0.448739	-0.15677	-0.620702	-0.276199	-0.105838	-0.0587055	0.258029	-0.547574
A_23_P118967	0.246066	0.51029	-0.185906	-0.085228	-1.12311	-0.227451	-0.302508	0.0811363	0.0764411	-0.00152027
A_23_P119006	-0.614076	-0.444245	-0.446412	-0.582332	0.0494001	-0.4586	-0.303724	0.18258	0.993729	-0.269002
A_23_P119015	0.00518377	-0.781353	0.220149	0.14133	-0.00520585	-0.560102	-0.0858894	0.26906	-0.186389	-0.099863
A_23_P11902	-0.57249	-0.45293	-0.295202	-0.667805	-1.18738	-1.08032	-1.2368	-0.874982	-1.02225	-0.848871
A_23_P119023	-0.426338	0.180892	0.340177	-0.332264	0.729208	-0.263773	-0.228457	0.00450731	-0.414455	-0.664182
A_23_P119040	-0.238841	0.136971	-0.171324	0.237971	-0.0314681	-0.629421	-1.20865	-0.209895	-0.592231	0.0690444
A_23_P119042	-2.39274	-0.927524	-1.34517	-1.68632	-4.89613	-2.68854	-2.74573	-4.10547	-4.48383	-2.95524
A_23_P119084	0.622291	-0.103277	-0.103236	0.0458936	0.152181	0.229361	-0.806094	-0.581426	0.342201	-0.050091
A_23_P119095	-0.0626313	-0.857858	-0.920332	-0.834592	-0.792249	-0.547454	-0.671564	-1.67202	-0.68127	-1.80172
A_23_P119102	0.359597	-0.113089	-0.713556	-0.811013	0.650262	-0.748946	0.517323	1.33984	0.0833244	-1.10166
A_23_P119130	2.92845	2.20946	2.21902	0.89794	2.07424	0.840146	1.75215	0.905248	0.337287	0.11176
A_23_P119141	0.36554	0.368267	0.111194	0.155795	1.78571	0.259767	0.643832	1.23425	-0.248919	0.368656
A_23_P119143	-0.21603	0.170762	-0.141801	-0.154598	-2.33946	-1.10136	-1.09416	-1.24837	-1.29389	-1.32101
A_23_P11915	1.2736	-0.327796	0.355577	0.745557	0.83007	0.102124	1.11933	0.219153	-0.0669349	0.887199
A_23_P119152	-0.155366	-0.123403	-0.375059	0.449761	-0.12042	-0.46082	-0.607017	-0.0327044	-0.497719	-0.321148
A_23_P119168	-0.268512	-0.368008	-0.112528	-0.420149	-0.106196	0.0441355	0.00970895	0.0438654	0.255857	-0.617096
A_23_P119196	-3.29908	-2.64131	-2.47882	-1.3661	-2.93361	-1.89657	-2.36065	-4.17493	-2.06173	-1.80264
A_23_P119202	3.50545	3.86762	4.10374	4.30544	0.862438	1.38256	4.15212	0.91354	3.42694	3.97333
A_23_P119214	-0.363919	-0.589816	-0.308355	-0.751442	-1.05778	-0.931099	-0.177114	-0.487045	-0.437895	-1.2466
A_23_P11922	-0.125087	-0.91562	0.901567	-0.134084	0.831737	1.81385	2.05599	-0.679457	1.05313	1.27553
A_23_P119222	-1.62013	-0.4143	-0.324308	-0.58556	-1.88269	-0.807156	-1.02871	-1.28293	-1.64099	-0.781572
A_23_P119254	-0.566704	-0.133527	-0.284273	-0.58663	-0.433214	-0.258686	-0.653957	-0.397458	-0.472468	-0.331176
A_23_P11926	0.278105	-0.704518	2.61884	0.212609	0.133514	-0.459848	-0.167966	-0.258278	0.839585	0.124586
A_23_P119266	-0.198758	0.142384	-0.781457	0.281484	-0.448662	0.625459	0.147687	-0.176783	-0.0615021	-0.0476093
A_23_P119295	-0.341246	1.03057	0.364373	0.329389	-1.01129	-0.966183	-0.698061	-0.41733	0.124677	-0.437462
A_23_P119311	-1.40988	-0.640415	-0.818604	-1.30854	-2.34617	-1.99923	-1.9226	-1.78054	-1.72576	-1.61699
A_23_P119322	0.107708	-0.731175	-2.59249	-0.363523	-2.52812	0.102588	0.67974	-0.437462	-0.102541	0.126427
A_23_P119337	0.312318	0.296956	-0.198458	0.249701	-0.157397	0.0827334	0.603146	-0.109254	0.10682	-0.159215
A_23_P119344	-0.283973	-0.477124	-0.14394	-0.701058	0.447261	-0.17516	-0.128126	0.506087	-0.639137	-0.186672
A_23_P119353	0.445141	2.23786	2.3491	3.60511	3.10408	2.5537	2.76476	3.14642	3.00226	1.66813
A_23_P11936	-1.66576	-0.697212	-0.818529	-1.47842	-2.34734	-1.53876	-1.5434	-1.65468	-0.986011	-1.57703
A_23_P119362	1.09089	0.420172	0.996369	0.811171	-0.107841	0.608173	0.0646465	0.247331	0.512371	-0.78138
A_23_P119377	-1.57137	-0.663755	-0.744581	-1.21716	-0.766783	-1.15396	-1.49816	-1.23722	-1.45668	-1.06692
A_23_P119390	-0.100716	0.0200726	0.209775	-0.10138	-0.0706733	-0.397126	0.0150166	0.0356584	-0.278711	-0.508116
A_23_P119395	-0.67615	-0.210924	-0.406355	-1.04507	-1.40064	-1.10748	-1.24805	-1.62477	-1.40922	-0.828028
A_23_P119407	-1.40236	-0.707314	-1.44864	-0.886944	-2.57029	-0.213378	-2.17117	-2.53259	-0.952833	-0.300633
A_23_P119418	1.27696	0.479042	1.13285	1.23204	1.12971	1.36214	1.25063	0.474098	0.769513	0.118731
A_23_P119448	-0.486882	-0.490327	-0.0208317	-0.241583	-1.00195	0.0487616	-0.519259	-0.794286	-0.343128	0.0968322
A_23_P119458	-0.0691216	-0.639135	-0.331007	-0.522121	-0.36728	-0.113241	-0.233487	-0.562467	-0.853883	-0.458285
A_23_P119464	-0.19463	-0.347771	-0.40338	-0.533093	-0.251354	-0.51043	0.132779	0.30546	-0.941533	-0.424457
A_23_P119478	-0.710531	-0.289063	0.306391	-0.435745	0.00850053	1.57127	0.197497	0.902416	1.56441	-0.0247084
A_23_P119500	0.0412869	-0.849211	-0.562694	-0.42256	-0.567306	0.110276	-0.539962	-0.450079	-0.574226	-0.580967
A_23_P119502	-2.26598	-1.40152	-1.25256	-1.32187	-1.64221	-0.303162	-1.04111	-2.21241	-1.03815	-1.21225
A_23_P119526	0.148418	0.901309	0.181279	0.108331	1.12147	-0.433146	0.360833	0.408697	1.11925	1.21031
A_23_P119535	-0.981773	-0.653825	-0.464411	-1.46815	-1.08539	-0.935266	-1.23517	-1.01726	-0.270542	-1.2136
A_23_P119543	-1.79394	-1.24688	-1.38271	-1.74549	-3.78418	-3.00266	-3.19626	-2.9156	-2.85924	-2.8077
A_23_P119562	-2.38122	-2.34107	-2.02222	-1.10132	-4.78233	-0.922301	-1.57565	-0.932528	-1.67254	-3.12435
A_23_P119573	-0.305754	0.157578	-0.0260225	-0.00308843	0.066973	-0.0783037	0.18307	-0.708658	-0.159797	-0.286466
A_23_P119583	0.0437324	0.848393	0.617508	0.482115	0.21302	0.611211	0.0554093	-0.0959644	0.286745	0.134707
A_23_P119593	-1.93038	-0.446117	-0.843936	-0.989751	-1.018	-1.63946	-2.3364	-0.971417	-0.835962	-0.783488
A_23_P119611	0.00510987	-0.34903	-0.0359703	0.0119406	-0.122822	-0.395284	-0.131823	-0.694926	-0.217422	0.13022
A_23_P119617	-0.246329	-0.163327	-0.411169	-0.658085	-0.327246	0.0677278	-0.451133	-0.233579	0.0956613	-0.137865
A_23_P119627	0.535701	-0.504561	-1.35122	-1.88125	-0.434665	-0.429238	-0.756756	-1.8275	-1.8739	-0.538329
A_23_P119634	-0.431483	-0.794308	-0.57651	-0.438701	-0.70577	-0.854223	-1.3448	-0.903573	-1.15387	-0.656942
A_23_P119677	2.13991	0.574133	0.811283	-0.235452	0.201031	2.68563	1.71285	3.33309	1.06145	0.0634421
A_23_P11968	-0.062552	-0.231742	-0.308308	-0.209066	0.239851	0.162544	-0.0548405	-0.416558	-0.308601	-0.096569
A_23_P119683	-0.711665	0.211656	-0.0366618	-1.69101	-1.07519	-0.90377	-1.74362	-1.14448	-1.00591	-0.529803
A_23_P119698	-0.468372	-0.209452	-0.76214	-1.39894	-0.888982	-0.957261	-1.06404	-1.15983	-0.85532	-0.871211
A_23_P119714	2.08734	0.966882	0.652387	0.614032	0.839773	2.15724	-0.0629954	-0.436521	0.455615	-0.388458
A_23_P119732	0.341921	-0.587338	-0.396418	-0.910873	0.559103	-0.497402	-0.451679	1.05801	-1.25194	-0.7395
A_23_P119735	-1.16468	-0.74375	-0.431894	-2.52533	-0.902184	-2.58841	2.61002	-0.771326	-0.947989	0.150547
A_23_P119753	1.53728	0.451158	-0.413821	0.0957479	0.543696	0.507886	0.676858	1.30109	-0.0679975	-0.187497
A_23_P119763	1.74166	1.70329	1.91481	1.66421	3.25586	2.13151	1.61078	1.48614	2.92512	2.30943
A_23_P119778	0.247046	-0.00913973	0.299023	0.0743562	0.511203	-0.14032	0.994511	0.742925	-0.016963	0.216838
A_23_P119789	0.472625	0.396878	0.539335	0.332178	0.695994	-0.29523	0.228969	1.25792	-0.124321	0.125583
A_23_P119794	-0.767095	-0.240013	-0.104487	0.074119	0.638393	1.73803	0.816623	1.33748	1.43822	0.618825
A_23_P11980	-0.354637	-0.304781	0.00110148	-0.668136	-0.400843	-0.473479	-0.268952	-0.501378	-0.639678	-0.654701
A_23_P119812	0.336419	-1.03315	-0.159731	0.221514	1.38331	1.2506	0.365307	0.309968	1.13073	0.209007
A_23_P119835	0.0015225	-1.36743	-1.35301	0.216689	-0.439662	-0.22625	2.07682	-0.79598	-0.377412	-0.133421
A_23_P11984	-0.594014	-0.311836	-0.481001	-0.396828	-4.26088e-05	-0.299296	-0.906628	0.0156615	-0.518792	-1.29118
A_23_P119850	-0.33783	-0.196307	-0.117279	-0.308329	-0.218357	-1.2306	0.109962	-0.760563	-0.466948	-0.568778
A_23_P119857	2.30941	1.54398	1.27425	1.44989	0.698578	1.59614	1.14603	2.29456	1.56643	1.44
A_23_P119886	0.371916	0.464884	-0.166614	0.050284	0.231976	0.197213	-0.120005	-0.153827	-0.0475864	0.846443
A_23_P119899	-0.457086	-0.120884	-0.599987	0.0842888	0.0972291	-0.219098	-0.278864	0.355518	-0.71805	-0.506688
A_23_P1199	3.23311	1.15298	1.59107	1.27998	2.45116	0.233645	2.308	2.75639	1.37248	1.32427
A_23_P119907	-0.188699	0.358936	-0.449035	-0.380639	0.328276	0.0657341	0.88679	0.387667	0.105141	-0.344858
A_23_P119916	-0.5911	0.338195	0.321526	-0.0362008	-0.939799	-3.36296	-0.886081	-1.07089	-0.823737	-2.06868
A_23_P119923	-3.18959	-0.847584	-1.23432	-1.74085	-1.02767	0.530697	-1.3921	-1.31225	-0.0513087	-0.304097
A_23_P119936	0.215052	0.669435	0.235505	0.130875	0.00629407	0.57637	-0.119805	-0.301977	-0.637258	-0.137522
A_23_P119943	-1.85303	-0.454466	-0.428429	-1.37995	-2.05022	-1.36981	-2.10312	-0.644795	-1.59443	0.549206
A_23_P11995	3.1509	1.82741	2.77177	2.11864	3.47607	2.47859	2.92434	2.4524	1.86244	2.17601
A_23_P119964	1.35892	0.591951	0.773466	1.72054	1.56419	0.693987	1.74074	1.68442	0.965837	1.74027
A_23_P119992	-0.315986	-0.731491	-2.56011	0.376403	0.260604	-0.535034	-0.468273	-0.258576	-2.2253	0.0815677
A_23_P120002	0.0898033	-0.0275136	-0.976406	0.0203468	-0.230169	0.525309	-0.026952	0.0263076	-1.11659	0.699602
A_23_P120048	-0.819547	-1.16247	-1.05064	-0.0176364	0.0389918	1.10602	0.397976	1.29396	0.997242	0.00868241
A_23_P120056	-0.00667028	-0.114512	-0.0955984	-0.0751658	-0.169227	-0.658914	-1.87101	0.192328	-0.190848	-0.507179
A_23_P120062	-0.405643	0.206202	0.404429	0.67048	-0.336057	-0.759368	-0.736814	0.25944	-0.605526	-0.265324
A_23_P12010	0.752615	0.177182	-1.00123	0.896301	0.74641	1.17477	1.03145	0.203329	0.933989	0.130231
A_23_P120103	-2.28636	-2.64614	-4.59672	0.368517	-2.42465	-2.47151	-1.97601	-1.16573	-2.77969	-3.80032
A_23_P120125	0.45641	2.21462	1.16039	0.21252	3.29114	-2.23175	0.6965	2.53623	2.10375	1.5602
A_23_P120146	0.159638	-0.504775	-0.332217	0.327741	-0.284767	0.112726	-0.837387	0.511429	-0.406521	-0.253646
A_23_P120153	-0.747604	-1.37338	-0.981342	-0.689626	-1.8241	-0.715755	-0.839242	-0.964897	-0.366962	-0.541845
A_23_P120170	0.688384	0.191661	0.384204	0.0825792	0.359252	1.12588	0.727681	1.18397	2.14631	0.214065
A_23_P12018	-0.0541917	-0.137376	-0.0195395	0.185631	-0.142102	0.948009	0.35947	0.0850012	0.0406017	0.745346
A_23_P120182	0.299022	1.31286	0.829773	-0.176761	0.702929	0.649216	0.681257	0.926983	0.808993	0.439546
A_23_P120194	0.282973	0.301954	0.426029	-0.0191737	0.183727	-0.0216922	0.306138	0.631672	0.373666	0.634818
A_23_P120227	-2.60726	-0.217602	0.107274	0.0428169	-2.16219	-1.8104	-1.86825	-1.69419	-0.884311	-0.311879
A_23_P120237	2.18198	0.999988	0.9107	1.71218	0.856885	1.03841	1.45691	1.30478	1.40985	0.800578
A_23_P120243	0.51638	0.856529	0.736224	0.518143	1.5904	0.899417	1.15915	2.23978	1.37154	1.0791
A_23_P120254	1.46272	0.863942	0.451778	0.681331	1.05963	0.735298	0.588845	0.973834	0.938823	0.838901
A_23_P120270	1.97701	1.4142	1.13159	1.58898	2.70381	2.51364	1.70584	1.88437	2.41283	2.31025
A_23_P120281	-0.184833	-0.864552	-0.674842	0.173497	-0.212513	-0.235587	-0.232043	-0.49484	-0.40004	-0.653686
A_23_P120316	2.45589	0.438158	1.62194	2.21409	3.58487	2.17014	1.88789	3.30953	1.40166	2.47568
A_23_P120325	-0.447272	0.185441	0.502847	0.536968	2.5689	-0.581576	0.732902	1.38932	0.842552	-0.690402
A_23_P120335	2.09749	0.945526	1.24185	1.07602	1.86625	1.25829	0.962023	2.11661	0.959401	1.89984
A_23_P120345	0.294716	-0.113233	0.156872	-0.0891654	-1.66935	-0.591396	0.0672167	-0.112313	0.221891	-0.75675
A_23_P120354	0.737345	-0.00693322	0.363911	0.236336	0.775495	0.281889	1.38383	0.00283418	0.789537	0.391717
A_23_P120364	1.05277	0.268325	-0.741064	-1.14607	-1.55305	-0.955662	-1.2418	-2.01244	-1.69359	-2.09576
A_23_P120378	-0.35204	-0.261928	0.1583	-0.0052105	-0.332244	-0.792007	-0.58004	-0.438462	-0.643256	0.276704
A_23_P120414	-0.0886627	-0.276385	-0.325641	0.180405	0.524297	0.483765	0.391406	-0.450391	0.162508	0.235906
A_23_P120428	-0.474108	0.385328	-0.114169	-0.351908	0.57977	-0.532365	-0.143395	0.125177	0.785973	-0.167323
A_23_P120435	-0.953912	-0.759532	-1.21892	-2.32744	-2.99103	-2.35999	-1.90585	-2.64592	-2.11575	-1.9362
A_23_P12044	-0.256126	-0.824789	-0.667274	1.12321	0.226955	1.33777	0.168465	0.379745	0.232332	0.306136
A_23_P120442	-0.248963	-0.152485	-0.187658	-0.659602	-0.449171	-0.25527	0.447433	-0.0656967	0.79139	0.205963
A_23_P120458	3.03801	2.94811	2.63701	2.3905	2.82192	1.74898	2.02262	2.40319	1.14798	1.20836
A_23_P120467	-0.809298	-0.400434	0.186799	0.63212	0.798104	-2.50191	-0.37411	0.32285	-0.102719	0.640249
A_23_P120472	-0.0821729	0.167345	0.0717989	-0.0824701	-0.0843523	-0.663384	0.42216	-0.29557	-0.642383	-0.369384
A_23_P120488	-2.08386	-0.648664	-1.31117	-1.84513	-3.40591	-2.55503	-2.16998	-3.34238	-2.26557	-2.47957
A_23_P120504	-0.581455	-0.241667	-0.170326	-0.923242	-2.16203	-0.760101	-0.459825	-0.44061	-0.736983	-1.40889
A_23_P120513	-1.6091	-0.678143	-1.05486	-1.54175	-1.92975	-2.0553	-1.68223	-1.93358	-2.0661	-1.34324
A_23_P12053	0.169101	0.776837	0.308778	0.398401	0.548876	0.251617	-0.193261	0.313672	0.812766	0.83522
A_23_P120545	-0.400644	-0.9025	-0.224368	-0.343474	-0.724669	-0.199605	-0.804257	-0.6125	-0.168103	-0.0440148
A_23_P120557	0.452659	-0.160075	0.858235	1.14436	0.681858	0.670344	1.57644	0.41316	1.16797	0.865838
A_23_P120566	-0.447809	0.190743	-0.576584	-0.263669	-0.744554	-0.662064	-0.861489	-0.787431	-0.765451	-0.330506
A_23_P120572	-0.08173	-0.104786	0.0240275	-0.409171	-0.996415	-0.227753	0.049193	-0.373254	-0.612891	-0.721843
A_23_P120588	0.0442427	0.0864891	-0.130767	-0.140308	0.739076	0.431241	0.1471	-0.148959	0.0666508	1.05135
A_23_P120594	-2.41747	-0.471251	-1.55662	-2.27923	-0.725221	0.542951	-1.46075	0.206467	0.015318	0.508578
A_23_P1206	1.90408	0.854868	0.471486	-0.0773738	3.13724	3.0548	3.96236	2.77094	0.209362	1.44578
A_23_P120606	-0.203541	0.149103	-0.177189	0.125705	1.31253	1.08017	0.698313	1.51364	0.943794	0.913057
A_23_P12062	1.3008	0.946215	0.858904	0.178586	2.69536	2.18209	1.65517	2.25956	1.91852	1.74502
A_23_P120629	0.197329	-0.353992	-0.165486	0.102939	-0.342991	-0.0499666	0.110556	-0.410791	0.0359078	-0.408433
A_23_P120644	0.267512	0.332743	-0.0313418	-0.285714	0.674312	0.130513	0.715793	1.07023	1.39515	0.10231
A_23_P120660	4.3863	3.4337	3.47027	2.61187	4.72184	4.08076	3.91015	3.70119	3.38766	3.13112
A_23_P120667	-0.212128	-0.18326	-0.466244	0.995613	1.3243	2.36223	0.449824	1.45489	2.1104	2.13556
A_23_P120694	0.455718	-0.679854	0.418023	0.064878	1.50143	0.689796	-0.249833	0.617378	1.36222	2.08157
A_23_P120710	1.08324	0.640753	0.852947	0.530448	2.05444	1.60055	1.68042	1.1233	1.37866	1.47137
A_23_P120744	1.05908	0.00272977	-0.159426	0.585091	1.29415	2.37584	1.74111	2.03258	2.15259	2.13236
A_23_P120776	0.115121	0.133432	0.202432	0.325777	0.619092	0.371585	-2.39378	-0.809935	1.46104	0.839274
A_23_P120784	0.062959	-0.202659	-0.151783	0.270864	0.486285	-0.403927	-0.580784	0.159072	-0.0577397	0.229928
A_23_P12079	-0.876641	-0.0174078	-0.566446	-0.981108	-0.608254	-0.224083	-0.878831	0.063618	-0.213307	-0.530495
A_23_P120794	-0.574883	-0.131293	-2.87847	-0.43857	0.247866	0.0917829	-0.411066	-0.39863	0.0299644	-1.37432
A_23_P120809	-1.77016	-0.614433	-0.649387	-0.964412	-0.890566	-1.14243	-0.97917	-1.38365	-1.32387	-0.806599
A_23_P120812	-2.22886	-0.619057	-0.245765	-0.455982	-3.04573	-2.34809	-2.30347	-2.3327	-1.65703	-1.1539
A_23_P12082	1.3473	0.957677	0.983619	1.16826	1.38899	0.183567	0.702177	1.07833	0.539644	1.2301
A_23_P120822	-2.5384	-1.41211	-1.36535	-1.90652	-2.54064	-2.31323	-2.38313	-2.38802	-2.47585	-1.89125
A_23_P120839	0.787315	0.794881	0.511326	0.637948	0.707921	0.0247175	0.215573	0.560529	0.18137	0.322979
A_23_P120845	0.1388	-3.3405	-3.17088	-2.65505	-0.451694	1.84266	-1.41856	-1.56223	-2.49506	-1.92748
A_23_P120860	0.449489	0.457866	0.382953	-0.0709166	0.486871	0.855407	0.0488584	0.107942	0.0149515	0.358496
A_23_P120863	-0.207228	-0.0321517	0.0611853	-0.0451595	-0.0985053	0.0648223	-0.177943	0.45469	0.51659	0.21087
A_23_P120883	-2.59453	-2.84248	-1.33605	-1.52633	-1.28176	-1.206	-1.08685	-0.967385	-0.726576	-0.523027
A_23_P120899	-0.351445	-0.442859	-0.345327	-0.402822	-0.92675	-0.558615	-1.05031	-1.07079	-1.30409	-1.07924
A_23_P120902	1.18413	1.9954	3.83421	7.06125	-2.01706	4.98682	5.33196	4.92763	-1.16326	6.84576
A_23_P120915	0.505295	0.240674	-0.215152	0.441985	0.959437	0.171538	-0.418264	-0.0324883	1.29437	0.0802464
A_23_P120921	-0.427676	0.309721	-0.240628	-0.244529	-0.240854	0.291299	0.321854	-0.0750352	-0.686698	-0.62031
A_23_P120931	0.433961	-0.57188	0.0267608	-0.273037	-0.681725	-0.438833	-0.291987	-0.564166	-0.511018	0.274148
A_23_P120933	0.6203	0.225561	-0.497401	-0.709131	1.99404	1.6449	1.71592	1.77671	1.27536	1.12547
A_23_P120941	-0.462427	0.0699382	-0.176456	-0.545427	-1.97	-1.20316	-1.37062	-1.41324	-1.23697	-1.21538
A_23_P120942	2.27907	0.308863	-0.407223	0.467129	2.31257	1.56188	1.33975	1.69182	1.17771	1.0009
A_23_P120947	1.72161	1.58204	1.55573	1.7777	1.79866	1.7034	0.992383	1.37942	2.04174	2.08126
A_23_P120953	-0.544091	-0.920759	-5.56851	0.0973222	-0.458337	-0.692248	-2.19634	-3.3761	-1.39971	-4.48421
A_23_P120970	0.219612	0.43355	0.364261	0.630286	1.37323	0.0304519	-0.296991	-0.186269	0.913557	1.46945
A_23_P120973	-0.0804515	1.11497	0.907164	1.02252	2.90305	1.27963	2.74837	1.67469	1.10323	0.437977
A_23_P120982	0.261054	1.32792	-0.956256	0.100599	0.139018	-1.62864	0.0615837	0.413525	0.030834	-1.13229
A_23_P121	-0.893504	-0.0742564	-0.950907	-0.581195	-0.400549	-0.826973	-0.634249	-1.059	-0.689666	-0.897986
A_23_P121011	-0.0571903	0.148007	-0.307159	-0.444933	-0.529954	-0.0934267	0.0146891	-0.489483	-0.882366	-0.645173
A_23_P121013	-0.990264	-0.534076	-0.658109	-1.03096	-0.821768	-0.734879	-1.52992	-1.09518	-1.0309	-0.752875
A_23_P121030	-0.479622	-0.234451	-0.119498	-0.35514	-0.728418	-0.187186	-0.0856723	-0.526759	1.13276	-0.920702
A_23_P121037	-0.360477	0.344211	0.403248	0.161863	0.203249	-0.124112	-0.26241	-0.155848	-0.0661044	-0.414749
A_23_P121051	-3.14449	-1.76057	-0.486612	-2.50218	-1.24599	-1.28443	-0.934898	-0.891552	0.10085	-0.223525
A_23_P121061	0.148604	0.0591128	0.654559	-0.111455	0.016207	-0.26531	0.989892	-0.911364	-1.42737	0.00116186
A_23_P121064	3.0189	3.58765	2.66091	3.77091	2.5204	-0.573232	2.6118	3.63431	3.35062	4.01664
A_23_P121082	1.87397	1.19679	1.91268	2.75564	2.76264	2.06061	2.65766	3.36636	3.3555	2.30238
A_23_P121095	1.31411	0.288769	0.55157	1.22721	2.11849	1.26163	2.31234	2.03819	1.5512	1.31834
A_23_P121102	0.165694	-0.342999	-0.656833	-0.228517	-0.489159	-0.372394	0.149453	-0.491197	-0.28129	-0.0921218
A_23_P121106	0.482294	-0.000244644	0.0098452	0.606367	0.769767	0.684298	1.20926	0.48319	1.17106	0.487729
A_23_P121120	0.480303	1.63207	0.857193	0.615846	0.335654	0.504213	1.34947	0.365754	0.57108	0.748305
A_23_P121122	1.65516	0.299734	1.15232	0.869997	0.950183	-0.1523	0.253882	0.715069	-0.20293	0.0150654
A_23_P12113	0.737834	0.134943	0.752794	0.603606	1.94168	1.88511	0.861913	0.285421	1.33426	1.56207
A_23_P121141	-0.156875	-0.238023	-0.223993	0.1907	0.0544867	-0.26114	0.289848	0.843081	0.101676	0.433008
A_23_P121144	-1.03984	-0.726566	-1.07493	-1.23423	-1.5139	-0.0746727	-1.07156	-1.08263	-1.75235	-1.72983
A_23_P121182	0.373566	0.958295	-0.204081	1.21106	0.0218735	-0.400634	0.4574	1.4142	-0.0516433	0.678418
A_23_P121196	1.9922	0.661891	1.01348	1.15817	1.56968	-0.392671	0.094685	0.484002	0.139124	0.132241
A_23_P121215	-0.345225	-0.310138	-0.762993	-0.427447	0.778254	-0.561234	-0.397715	0.0849922	-0.3353	-0.919033
A_23_P121222	0.38369	0.151385	0.668332	0.785639	1.22204	1.20013	0.551167	0.619863	0.436847	0.965366
A_23_P121234	0.379339	-0.301614	1.41024	0.121799	0.384109	0.366088	0.509521	1.21804	1.14565	0.984156
A_23_P121250	1.29018	1.33393	1.04569	1.13024	2.03949	1.64318	1.44183	1.34522	0.985836	1.65635
A_23_P121253	-0.189348	-0.311568	-3.40292	-0.44118	-3.42139	-0.418618	-1.50096	-0.81214	-4.15623	-3.06346
A_23_P121265	-0.30445	0.687395	0.137343	-0.0762826	-1.15776	-0.063928	-0.310241	-0.647234	-0.240519	0.022625
A_23_P121276	0.152087	-0.305605	0.143557	-0.00439618	-0.382613	-0.243946	-0.143383	-0.171765	-0.782928	0.0204858
A_23_P12128	-0.555584	-0.327212	-0.339132	-1.03609	-1.54472	-1.11263	-1.84903	-2.17431	-1.2738	-1.21737
A_23_P121282	-0.189379	-0.0850247	0.0267738	-0.329979	-0.534258	-0.273403	-0.239182	-0.175706	-0.333046	-0.52431
A_23_P121326	1.39003	-0.416454	-1.5275	-0.553382	-0.38115	1.51502	-0.102492	0.41316	-0.892723	-0.958747
A_23_P121340	0.0848557	-0.158151	0.292474	-0.529937	-2.36556	-0.174709	0.492971	-0.678333	-0.533967	-1.49079
A_23_P121345	-0.148101	-0.159717	-0.197663	-0.167413	1.0026	0.223009	-0.437962	-0.0734361	-0.817422	-0.218202
A_23_P121356	-0.256929	-0.334644	-1.50347	-1.64457	-0.720124	1.0314	-0.430169	0.401851	-0.334648	-0.449147
A_23_P121374	0.686618	1.38763	1.73263	0.129939	2.40412	1.85397	2.49549	1.80829	0.960199	1.90693
A_23_P121386	0.0722292	-0.437582	0.233245	0.475336	0.355177	-0.174882	0.332063	0.425509	0.308336	0.117392
A_23_P121396	0.690693	-0.258992	-0.0454678	0.767207	0.64679	0.477355	-0.0132153	-0.0517232	-0.499177	0.876933
A_23_P12140	0.617015	-0.0930705	0.319537	0.459905	0.34097	0.721208	1.1607	0.0175379	-0.070639	-0.308228
A_23_P121405	0.347225	0.801217	0.217004	0.636333	1.37911	0.86284	0.848348	0.992051	0.941324	0.59186
A_23_P121413	-0.436736	-0.463593	-0.306207	-0.546716	-0.426183	-0.567227	-0.610765	0.262494	-0.246385	-0.429926
A_23_P121423	0.54497	0.337944	0.262864	0.275586	0.505902	-0.265303	-0.252378	-0.278234	0.330239	0.198097
A_23_P121441	0.925034	0.197867	0.377459	0.183194	0.33114	2.07566	0.434449	0.428268	0.0238602	0.658771
A_23_P121447	0.337408	-0.089078	0.21719	-0.060361	-0.134765	-1.80977	-0.117662	0.19326	0.0191245	-0.0413671
A_23_P121459	2.03872	0.895338	1.39015	1.2526	0.950152	1.07554	-0.922145	1.00819	1.71621	2.0647
A_23_P12147	-0.306316	0.0157832	-0.227999	-0.545807	-0.6372	-0.616852	-0.299773	-0.0213345	0.342088	-0.446538
A_23_P121480	0.0248265	1.69828	0.176146	0.5763	1.93099	0.738255	1.98334	1.06271	1.54753	0.775906
A_23_P121489	0.26899	-0.278744	-0.0516303	-0.468452	0.254539	-0.22226	0.117895	-0.112125	0.0436153	0.0425724
A_23_P121499	-0.19032	-1.9248	-0.664334	-0.91884	-1.84089	-0.748626	-1.52467	-2.47472	-2.1661	-0.202041
A_23_P121506	-0.770761	-0.185444	-0.298731	0.0910861	-0.431481	-0.247374	0.335101	-0.0819643	-0.718623	-0.155401
A_23_P121527	0.370695	0.440069	0.326287	1.00335	1.88721	2.13743	1.39783	2.68757	2.36333	1.68664
A_23_P121533	-2.40477	0.272499	1.20121	1.34854	1.87448	-3.06729	-3.31338	-1.67716	-0.726275	-0.34594
A_23_P121545	-2.52685	-0.199783	-0.290755	-0.120464	-1.70019	-0.495417	-0.598093	-0.905274	-0.116702	-0.748946
A_23_P12155	0.827029	0.578492	0.385202	0.537546	0.233953	0.56734	0.350859	1.16431	0.240298	0.556579
A_23_P121564	-0.400141	-0.679988	0.021937	-0.4	0.354225	0.284883	0.163641	1.05	0.425616	0.391471
A_23_P121573	-0.197401	0.734848	0.325852	1.16639	1.35944	0.94666	0.174986	1.64972	0.778768	0.32357
A_23_P121586	-0.492356	-0.363154	0.173414	0.383572	0.0113657	-1.00661	-1.81891	-0.449567	-0.953605	0.441383
A_23_P121596	0.152531	-0.759096	-0.165586	-0.178634	-0.454283	-0.869328	-0.765818	0.513998	-0.510495	-0.0422711
A_23_P121602	3.32053	1.29778	1.44601	2.8012	3.09622	0.338485	1.54418	2.04766	2.12561	2.65046
A_23_P121614	-1.1816	-0.657869	-0.494755	-0.86746	-0.398698	-0.592108	-0.76401	-0.0240635	-0.329173	-0.98865
A_23_P121622	-0.317994	-1.17396	-0.589834	-0.226395	-0.581667	-0.578865	-0.815449	-0.490365	-0.374437	-0.248372
A_23_P121637	0.798473	0.857874	0.941631	1.24312	0.829875	1.28509	1.098	1.34003	0.424979	0.908428
A_23_P121646	-0.762406	-0.437467	-0.49255	-1.05511	-3.36528	-1.592	-2.03614	-1.73318	-1.91667	-1.9448
A_23_P121657	-0.111518	-0.391639	-1.16146	-0.849838	-0.00425083	-0.516093	-0.492822	1.18254	-0.768996	0.00683051
A_23_P121665	0.0254146	0.271729	0.149402	0.426656	0.186614	0.170812	-0.442063	-0.329045	-0.0978525	0.323762
A_23_P121676	-0.396492	-0.171433	0.0631732	-0.451013	-0.407916	-0.297918	-0.127895	-0.233872	-0.255419	-0.301226
A_23_P12168	2.36893	0.74954	0.168321	0.479749	1.45099	1.42547	1.98077	0.324385	0.311988	0.567508
A_23_P121686	0.913032	0.37221	1.2898	1.29937	1.20415	1.41286	1.07996	0.652761	1.02727	1.35213
A_23_P121695	-0.0967172	-2.31928	0.156835	-6.0535	0.524829	-0.765908	-0.0595249	-0.374611	-1.79117	-2.27303
A_23_P121702	-0.757642	-1.71832	-2.14274	-0.843442	-0.406579	0.0601761	-1.13937	-1.48859	-1.10956	-0.598084
A_23_P121716	1.70237	1.66267	2.70185	1.8907	1.03885	1.05295	1.69922	3.73304	3.6993	1.02418
A_23_P121722	-2.31125	-0.0489383	0.399333	-1.6032	-1.16624	-2.49345	-1.03208	-1.07756	-0.494231	-0.496604
A_23_P12173	-0.814991	-0.651371	-1.79755	-0.400797	-2.24425	-1.45474	-1.43985	-2.96152	-1.48715	-2.39181
A_23_P121773	0.513914	-0.0948968	0.367072	1.54945	1.0106	0.70278	0.977336	0.818041	1.5991	1.99633
A_23_P12178	-0.0156279	-0.294768	-0.0692843	-0.112538	-1.37322	-1.16536	-1.19688	-1.18978	0.440588	-0.81981
A_23_P121783	0.162742	-1.06469	-1.94651	-0.660178	-2.04179	0.56129	-0.57253	-1.95254	-0.544299	-0.838368
A_23_P121795	0.0325712	0.106434	-0.202165	-0.369862	-0.764327	0.312007	-0.329152	-0.282685	-0.568141	-0.299633
A_23_P121806	1.73183	-0.460939	0.620229	0.183456	1.89234	1.97119	1.08284	1.11797	2.09158	1.86926
A_23_P121813	0.58048	0.031976	-0.553786	-0.0877306	-0.386921	-1.30822	-0.251571	-0.36284	-0.0189464	-0.60502
A_23_P121825	0.645418	-0.538742	-0.428771	0.453278	1.53259	1.78549	1.02843	1.0998	1.36955	1.43512
A_23_P121851	0.103845	-0.153669	0.0813316	-0.257892	0.509991	0.321185	-0.141783	0.182502	0.0435463	0.495383
A_23_P121869	0.606945	-0.188876	0.573479	0.162699	0.838954	-0.373385	-0.0715907	-0.0791216	-0.0121026	0.0619321
A_23_P121875	0.93895	-0.441474	-0.157742	0.472181	1.43293	0.614085	1.03239	0.039913	0.422118	1.15795
A_23_P121885	-0.0329728	-0.0298136	-0.150364	0.212733	-0.826185	0.399676	-1.79185	0.278747	-1.10607	0.651948
A_23_P12189	-0.2111	0.358739	0.922233	-0.166192	0.850872	0.486331	1.30679	-0.0670904	-0.250216	1.50977
A_23_P121898	0.593707	0.0649999	0.248965	1.25752	0.34383	1.11786	-0.149241	1.30653	0.986384	0.906675
A_23_P121914	-0.465438	-0.524389	0.00860639	-0.304677	-2.06001	-1.42685	-1.7916	-1.21509	-1.05788	-1.03155
A_23_P121926	0.261405	0.384897	0.809408	3.04548	1.55425	3.25626	2.06455	1.50742	-0.271477	2.68036
A_23_P121939	-0.223377	0.0697864	0.0661165	-0.239013	0.887246	-0.116176	-0.395692	0.15837	1.93833	0.313348
A_23_P121945	-2.67248	-1.56908	-1.02834	-2.26665	-2.68235	-3.2024	-2.91635	-2.73713	-1.84024	-1.27791
A_23_P121956	1.84095	2.12483	2.10311	0.184413	2.60745	2.12425	1.85998	2.34225	1.72649	1.21535
A_23_P121971	-0.411563	0.465261	-0.14497	-0.299451	0.485655	-0.456404	-0.100543	-0.680061	-0.598818	-0.266711
A_23_P121976	-0.437277	0.510249	-0.15042	0.175441	-0.381432	-0.279064	-0.0793195	-0.145507	-0.937112	-0.0884623
A_23_P121987	0.482215	2.97732	0.300347	0.344084	0.778702	1.1716	0.996561	0.0865181	0.73544	0.348386
A_23_P12199	-0.516653	-0.355142	-0.0970016	-0.468882	-0.167392	-0.638952	-0.422726	-0.105687	-0.166948	-2.0141
A_23_P122001	2.2731	0.811262	1.2437	0.62256	2.62672	1.05572	0.583262	0.686538	1.34733	1.42225
A_23_P122007	0.102606	-1.95112	-0.336076	-0.935582	0.859192	2.24157	0.29462	-0.492548	0.10835	1.52728
A_23_P122027	0.0683601	-0.165799	0.23833	-0.134422	0.36178	0.15625	0.211361	-0.149318	0.83359	0.338447
A_23_P122041	1.73873	0.155829	1.12296	1.79306	1.33103	2.27751	1.62956	1.18398	1.84017	1.38009
A_23_P122052	2.75664	1.34313	2.65775	1.99455	3.16482	2.33427	1.74566	3.28428	1.09347	2.63611
A_23_P122067	-0.460737	0.371922	0.53772	-0.114692	0.0843834	0.189335	-0.651892	-0.545577	-1.2865	-0.599424
A_23_P122068	0.277019	-0.297636	0.723194	0.248967	0.313763	0.151205	-0.673597	0.666086	-0.349483	0.435415
A_23_P122077	-0.493974	0.0415169	-0.30771	-0.387189	-0.746801	-0.295305	-0.411691	-0.504316	-0.0269224	-0.363627
A_23_P122104	-1.53057	-0.534833	-0.457767	-1.30207	-0.775983	0.151214	0.551501	0.465484	0.016678	-0.510191
A_23_P122116	3.23507	2.70347	1.73941	2.33953	2.77862	2.30692	1.804	1.78849	1.67228	1.74602
A_23_P122127	-0.565402	0.0878896	-0.203438	-0.863153	-0.967218	-1.04123	-0.487288	-1.60501	-0.374904	-0.417375
A_23_P122134	-0.851495	-0.268177	-0.440997	-0.629482	-0.439627	-0.393744	0.261799	-0.978099	0.317425	0.521682
A_23_P122144	-0.602012	-0.133315	-0.117306	-0.50244	-0.167213	0.376955	0.1083	-0.53234	0.179471	-0.5031
A_23_P122152	0.122855	0.417918	-0.0846724	0.20583	0.0290963	0.259741	0.192929	0.452996	0.122487	0.884421
A_23_P122174	1.80645	1.21864	1.53498	0.983881	2.0825	1.85726	2.26958	2.44747	1.82753	2.15681
A_23_P122197	5.53323	2.0527	4.22406	2.29514	4.69053	2.0351	2.76386	2.94592	2.87517	1.96279
A_23_P122210	-0.903989	-0.815817	-0.355247	-0.101124	-0.281787	-0.879991	0.136501	-0.631914	-1.04626	-0.45412
A_23_P122216	3.02593	3.21882	2.71054	2.91227	2.61923	1.34621	2.15892	4.49433	2.55	2.85249
A_23_P122228	2.36027	1.14997	1.90222	1.06097	1.98963	1.33099	0.647831	0.841381	0.412866	1.36167
A_23_P122233	1.64296	1.03117	0.641701	1.29895	0.968396	1.1306	0.204165	0.518344	1.30055	0.43922
A_23_P122254	1.60311	0.186749	1.14799	1.26387	2.31941	1.27175	1.2284	1.29962	0.958909	1.3325
A_23_P122304	1.08891	0.369611	0.922599	1.24715	2.39035	0.554666	0.695432	2.00063	0.597668	0.742998
A_23_P12231	-0.39289	-0.214773	0.38207	-0.208367	0.289447	-0.341158	-0.852163	-0.431217	0.786956	0.13674
A_23_P122375	-1.0919	-0.688737	-0.658358	-0.65353	-0.324829	-0.62622	-0.69493	-0.830744	-0.100442	2.83558
A_23_P122387	3.58718	2.82143	2.55962	3.39149	1.23164	1.74158	1.24867	1.98723	0.361185	1.06344
A_23_P122393	-1.04001	-0.684528	-0.485433	-1.21839	-0.061215	-1.15834	-0.910199	-0.743268	-0.65483	-0.49521
A_23_P12241	-0.246745	-0.489221	0.175497	-0.742235	0.195579	-0.0260385	0.71701	0.269457	-0.242133	-0.401493
A_23_P122414	-0.45795	-0.0701628	-0.362535	0.12561	-1.25625	-0.0255567	-0.308874	-0.0314692	-0.17419	-0.669321
A_23_P122439	0.426435	0.0801522	0.300472	0.702733	0.661499	0.685372	-0.0258245	0.876494	0.17635	0.581646
A_23_P122443	2.70292	0.607752	0.740087	1.6912	-2.21037	-0.757901	-0.0111258	1.0842	1.20766	1.95674
A_23_P122464	0.342235	-0.569245	0.294682	0.584903	0.465537	2.68546	0.25413	-0.104683	0.332886	-0.178228
A_23_P122481	-0.546403	-0.16631	-0.357028	-0.0901535	-0.0809373	0.497576	-0.0976075	0.0530535	0.723737	-0.0192338
A_23_P122485	-0.777542	-0.582247	-0.583537	-0.784992	-1.36438	-1.20586	-1.08112	-1.07266	-1.02597	-1.07357
A_23_P122493	-0.0515234	-0.0674755	-0.367974	-0.212682	0.471536	0.263611	-1.24582	-0.16151	0.184746	-0.535833
A_23_P122508	0.338029	0.416297	-0.540376	-0.624227	-0.496291	0.53042	-0.0719297	-0.742286	-0.373772	-0.343152
A_23_P122531	2.55445	1.53434	1.94079	1.54678	2.87187	2.6175	1.8227	2.57727	1.8347	1.32815
A_23_P122532	-1.36946	-0.911572	-1.48893	-1.02827	-1.80864	-1.99163	-1.09066	-2.07048	-2.11816	-2.00114
A_23_P122545	2.64598	1.47878	1.11508	1.0777	1.72684	1.39296	0.97927	0.562807	0.741169	0.517935
A_23_P122563	0.602341	0.0463967	0.826814	-0.295718	1.51346	0.515683	0.0638517	1.35621	0.399545	0.0581354
A_23_P122579	-0.465051	-0.388088	-0.206499	-0.333429	0.0839358	-0.390477	-0.445676	-0.141094	-0.700959	-0.48052
A_23_P122582	0.205845	-0.269085	-0.732585	0.0454103	1.162	0.78522	0.77412	0.589449	0.276529	0.385713
A_23_P122600	-1.62497	-1.129	-0.742305	-1.77888	-1.65542	-2.48418	-2.49196	-2.03592	-1.53006	-1.72467
A_23_P122615	1.21299	0.553168	0.257321	0.724368	0.127909	-0.479848	0.32688	-0.0685424	0.915123	0.1125
A_23_P122624	0.875961	0.405199	0.99129	1.51388	1.64538	1.44708	1.5764	1.81525	1.57658	1.4054
A_23_P122650	2.67152	1.62415	1.00263	0.697878	0.173343	2.61784	-0.114549	-0.769687	-1.22954	-0.342838
A_23_P122655	-0.538906	-0.380609	0.0162806	-0.620214	-1.23765	0.0416713	-1.18783	-0.460893	-0.939416	-0.993725
A_23_P122662	-2.18355	-1.14128	-1.60486	-1.10996	-2.6333	-2.71745	-1.94627	-2.55562	-2.89806	-2.85836
A_23_P122674	0.868886	0.354288	0.847102	0.81643	0.557262	0.334162	0.0714869	0.431873	0.702274	0.500894
A_23_P122688	-2.86263	-1.98715	-0.659655	-2.10294	-1.54183	-0.853049	-0.291138	-0.104633	-0.468594	-1.38054
A_23_P12272	0.0819171	-0.405051	0.214767	0.22024	1.42561	1.09058	0.929117	1.06021	0.493603	1.17077
A_23_P122724	-0.788129	0.154218	-0.351985	-0.489662	-0.775239	-0.7945	-0.815987	-0.429514	-0.722218	-0.623558
A_23_P122775	3.65818	1.07572	1.81095	1.09158	2.95439	1.23291	2.00587	1.94461	1.64324	2.39946
A_23_P122782	2.13043	1.28727	1.78142	1.90417	3.71143	3.31223	2.28195	3.45832	2.59581	2.59779
A_23_P122796	-0.0212497	-0.751577	0.348662	0.594297	1.13618	1.60634	0.616392	0.88268	-0.320439	0.664644
A_23_P122805	0.421156	-0.187363	0.884412	0.180349	1.66851	1.19457	1.28089	1.47674	1.11987	1.55089
A_23_P122815	0.685628	0.169651	0.194969	-0.279698	1.11478	-0.722598	0.0102758	0.889402	0.725344	-0.228785
A_23_P12282	-1.47689	0.0754722	-0.127787	0.808684	0.609616	0.129731	-0.931808	-1.33134	-0.499617	-0.929127
A_23_P122852	-0.71668	0.327407	-1.82692	-1.2124	-2.1634	-0.436137	-0.844757	-1.29969	0.214693	-1.29799
A_23_P122863	0.942265	0.638248	1.65994	0.360157	2.80279	1.63704	0.821593	1.69616	1.42773	0.611556
A_23_P122876	-0.386447	1.25639	1.50977	-0.44857	1.23711	-0.0737932	-0.183905	0.483876	0.485832	-0.312068
A_23_P122896	-0.543574	0.0930291	-0.0734996	-0.409035	-0.243342	-1.11799	-0.480176	-0.848729	0.10325	-0.336496
A_23_P122906	-3.56048	-2.13338	-1.52825	-3.39498	-1.49385	-1.11631	-1.4742	-0.962225	-0.736021	-2.07164
A_23_P122915	1.34686	-0.283298	0.175704	0.266282	2.02715	1.44888	1.75094	1.37693	1.84223	0.444167
A_23_P12292	-1.67811	-1.89885	-0.793896	-1.96737	-1.91738	-4.92103	-0.500524	-4.39557	-1.83519	-3.78415
A_23_P122924	-1.76192	-2.04206	-1.26768	0.294185	-0.504517	-1.57921	-2.12882	-0.834604	1.0033	-1.06158
A_23_P122937	-0.746517	0.225509	0.0211802	-0.657273	0.291017	0.443057	-0.00713458	-0.550291	1.15265	0.0244233
A_23_P122947	1.39473	0.837267	1.21099	1.67564	0.543359	1.58771	0.806841	0.510235	2.01747	1.34236
A_23_P122959	-0.118769	-0.347327	-0.40727	-0.264314	-0.54134	-0.575405	-0.814447	-0.54032	-0.00604546	-0.383539
A_23_P122976	-0.24716	-0.0696789	-0.0295586	-0.0598406	0.472626	-0.0349523	-0.0919517	-0.403099	0.439396	-0.0204321
A_23_P123010	0.416362	-0.27359	0.134539	0.00552025	-0.253419	0.4191	-0.248681	-0.190682	0.137608	0.052104
A_23_P123015	-0.413967	0.282774	-0.422951	-0.232439	-1.08479	-0.349542	0.370042	-0.541783	-0.806261	-0.447109
A_23_P123018	-0.0326224	0.670085	0.269296	0.268712	0.331875	0.519383	-0.487221	-0.254305	-0.290249	0.103044
A_23_P123022	-0.18367	0.00221197	0.114401	-0.375824	-0.589025	0.301433	-0.530625	-0.893046	-0.495205	-0.438154
A_23_P12303	-0.0571679	-0.188524	-0.385114	-0.246046	-0.866401	-0.791244	-0.157102	-0.698125	-0.245262	-0.46164
A_23_P123039	0.489238	0.402398	0.80356	0.353094	0.29391	0.303422	0.314623	-0.222381	0.0605417	0.72588
A_23_P123060	-0.11609	-0.327048	-0.0864741	-0.143105	-1.65273	-0.0417383	-0.276768	0.105376	0.0869935	-0.433283
A_23_P123071	-1.97356	-0.793521	-0.678546	-0.598461	-0.666578	-2.33346	-1.20671	-1.69075	-0.426159	-0.367915
A_23_P123086	0.766131	0.543936	0.539096	-0.0162434	0.23546	0.353835	0.336724	0.448474	0.446647	0.970974
A_23_P123096	-0.0979728	-0.805251	0.170515	-0.36035	-0.196382	-0.184148	-0.355844	-0.290921	-1.06246	0.278885
A_23_P123108	-0.443324	-0.295725	-0.129849	-0.449139	0.291065	-0.557627	0.128451	-0.275186	-0.416615	-0.399312
A_23_P123112	0.00890914	-0.234762	-0.410568	-0.418672	-0.881207	-0.232405	-0.448958	0.0616261	-1.01001	-0.565915
A_23_P123125	-0.450858	-0.631669	-0.311561	-0.453905	-0.00375672	-0.341716	0.241519	-0.773702	-0.393922	-0.483741
A_23_P123133	-0.43103	-0.106215	-0.0128788	-1.19051	-0.00855229	-0.210923	0.879924	0.0309635	0.241137	-0.728809
A_23_P123164	-1.44025	-0.823373	-0.160046	-1.85876	-1.95003	-2.70545	-2.02037	-1.75765	-1.33625	-1.3657
A_23_P123172	0.826585	-1.46273	0.24112	1.23346	0.964154	-1.31686	0.236419	-0.891864	0.5485	-1.18852
A_23_P123193	1.32104	0.346972	0.656842	1.34499	2.22526	1.0828	0.762304	1.20095	-0.20414	-0.810502
A_23_P123228	-0.283583	0.150982	-0.159591	-0.238395	-0.457008	-0.212216	-0.404415	-0.337861	-0.0936856	-0.213366
A_23_P123234	1.63972	1.66359	1.87984	2.40572	1.42341	2.26841	2.15974	3.72884	1.60559	2.57374
A_23_P123242	0.0675991	0.803838	0.0650893	0.291774	-0.516208	0.0698682	-0.333273	-0.173508	0.432355	-0.0380004
A_23_P123256	-0.551343	0.0647552	-0.212702	-0.0731544	-0.920163	-0.583587	0.0477227	-0.115258	-0.475069	-0.00369365
A_23_P123265	-0.330696	-0.305698	-0.353428	-0.0254848	-0.613426	-1.3528	-0.31212	-0.0698701	-0.153682	-1.61406
A_23_P123276	-0.547634	-0.38283	0.504346	-0.0769414	-0.542873	-0.132651	-0.23897	0.381899	1.0118	0.372276
A_23_P12329	-1.43883	-0.815849	-1.47877	-0.397527	0.216289	-0.434118	-0.0696049	-2.89945	-1.20409	-0.108133
A_23_P123308	-0.815418	-0.195457	-0.793563	-1.01329	-0.0364113	0.000623272	-0.740184	-1.36753	-0.658778	-0.109006
A_23_P123315	-2.22403	-0.876827	-0.308942	-0.665429	-2.40759	-1.84702	-1.89734	-2.04301	-1.64581	-1.71154
A_23_P123330	2.14314	0.255383	0.886123	0.73129	1.62891	1.16403	2.33258	2.18358	1.06944	0.956047
A_23_P123336	0.0362982	-1.08707	0.892961	0.149643	-0.175407	-0.171721	-0.459949	-0.0616227	-1.16687	-0.0341787
A_23_P123343	1.53487	0.00931905	2.36952	1.14225	2.33093	1.39226	1.65714	1.11798	1.66072	2.16136
A_23_P12336	0.743376	0.0123898	0.0814782	-0.19708	2.11866	3.35175	1.74216	0.205908	1.68186	3.29354
A_23_P123362	-0.436453	-0.64601	-0.777551	-0.360903	-0.013239	-0.259939	-0.905576	-0.654879	-0.51156	-0.6993
A_23_P123393	-1.21661	-0.581578	-0.677553	-1.16464	-1.18237	-1.798	-1.59057	-1.2322	-1.42671	-1.1352
A_23_P123402	-0.0152079	-0.321799	0.377295	-0.201017	-0.704371	0.185276	-0.0475932	0.228304	-1.5322	-0.0448854
A_23_P123413	0.612623	0.332112	0.576863	-0.00666468	0.518941	0.521136	0.902007	0.333213	-0.249425	0.249052
A_23_P123424	0.585082	0.396199	0.723801	0.672234	1.621	0.642722	1.91714	0.371268	0.199237	0.221218
A_23_P12343	2.42799	-2.42835	0.790493	1.59923	4.18794	1.32016	0.892899	-3.61404	-0.114315	0.0321998
A_23_P123440	0.0996508	-0.154952	0.0195128	-0.393868	0.339692	0.561641	1.01299	0.18443	0.428009	0.004693
A_23_P123448	-0.212737	0.503399	0.280671	-0.153237	0.142083	0.175676	-0.00856068	-0.398446	0.125264	0.75887
A_23_P123454	0.494819	1.11631	-1.50131	1.17521	0.264038	1.0132	-0.717939	-0.193588	-1.12278	-0.587866
A_23_P123463	-0.0777307	0.549156	0.000546363	1.12446	-0.0758552	0.0120546	0.188826	0.181588	0.176009	0.17578
A_23_P123466	0.380182	0.0684839	-0.0129057	0.0244767	0.877407	0.295929	0.65282	0.377392	0.0517814	1.28878
A_23_P123478	-0.379694	0.010156	0.0648661	-0.342083	-0.713352	-0.18725	-1.07153	-0.489679	0.292653	-0.486583
A_23_P123488	0.338038	-0.276816	-0.408764	-0.118886	-0.400707	-0.0958736	-0.891181	-0.740281	-0.602702	-0.130565
A_23_P123503	-0.292183	-0.39093	0.69576	0.532572	-0.306993	-0.226487	-0.364303	-0.344245	-0.0296357	-0.034442
A_23_P123522	0.092392	-0.43327	-0.600623	-0.0217004	-0.0997002	0.494271	-1.21376	-0.107999	0.0547358	-0.0445877
A_23_P123539	0.746011	2.56622	1.42782	3.29024	2.00867	1.09825	2.05848	1.24314	1.7823	0.95529
A_23_P123544	1.27905	1.03222	0.865705	1.47185	1.62639	0.529787	1.0845	1.28845	1.78294	1.60065
A_23_P123555	-1.5199	-1.67263	-2.44566	-3.05331	-1.60073	-1.21532	-0.832591	-1.75973	-1.41828	-0.604212
A_23_P123563	4.02306	3.30834	2.83263	2.91935	3.96527	3.10088	3.60332	3.66495	2.70296	2.90475
A_23_P12357	-0.700149	-0.732581	-0.889502	0.868873	-0.434103	-1.03614	-0.341442	-0.0629975	-0.539803	-0.0776585
A_23_P123578	-0.747699	-0.396451	-0.174065	-0.598825	-0.477297	-0.416778	-0.155465	-0.575162	0.156103	0.0918116
A_23_P123582	-0.500029	-0.118778	-0.237024	-0.0616426	0.755917	0.731939	0.0264843	-0.607576	0.423204	0.772428
A_23_P123596	2.64171	0.319697	2.47243	0.888696	2.35013	1.96644	3.20745	-0.927115	3.43171	2.76367
A_23_P123608	0.412745	0.968647	0.955152	-0.409854	0.802086	0.811237	0.0522801	0.579853	-0.178454	0.988324
A_23_P123622	-1.17711	0.31795	0.18283	0.191022	-3.32079	-2.56895	-2.62745	-2.55395	-1.90424	-1.68384
A_23_P12363	2.45923	0.85684	1.90198	2.68874	2.60444	2.38379	2.0576	3.05241	3.27297	2.83204
A_23_P123645	-0.741001	-1.60372	-1.12248	-2.57422	-0.493987	0.334617	-0.554462	-0.918949	-0.864266	-0.0250234
A_23_P123666	-1.20953	-0.745372	-0.523091	-1.16744	-0.88444	-0.829235	-0.265876	-1.45477	-0.66685	-1.33674
A_23_P123672	-0.893372	-0.179097	-0.943962	-0.216981	0.463614	1.60055	0.428559	-0.0577608	0.00723781	1.59506
A_23_P123692	-0.912509	-1.02253	-0.700043	-1.03047	-1.48535	-1.63004	-1.5329	-1.59947	-1.50312	-1.47503
A_23_P123704	-0.273656	0.169533	0.0323199	0.3431	0.10989	0.886204	-0.342528	-0.491656	0.96174	-0.252536
A_23_P123714	-1.18891	-0.809592	-0.556748	-1.29559	-1.3978	-1.32995	-0.547085	-0.918386	-0.566932	-1.15416
A_23_P123727	0.0629027	1.4151	-0.355121	-0.303865	-0.147252	-0.840289	0.49697	-0.641732	-0.118246	0.066135
A_23_P12373	0.457767	0.365394	0.249213	-0.197984	-0.275377	-0.294865	-0.0744184	-0.522499	0.214948	-0.217435
A_23_P123732	-0.329158	-0.77418	-1.69028	-0.116845	-1.29705	0.181678	1.52925	-0.9491	0.768984	0.798826
A_23_P123763	0.0301303	-0.245369	-0.118691	0.0518109	-0.472857	-0.401541	-0.216791	0.375342	-0.487525	-0.154468
A_23_P123794	-1.84691	-0.543412	-0.515501	-1.37957	-2.17694	-2.42253	-2.18374	-2.23768	-1.46488	-1.60925
A_23_P123830	-0.428045	-0.208447	-0.110199	-0.496834	0.236269	-0.00317621	-0.088258	-0.274391	-0.28912	0.00543563
A_23_P123838	-1.59181	-0.276974	-0.338691	-0.380581	-0.908588	-1.36988	0.410259	-0.936405	0.141528	-0.148702
A_23_P123848	-0.237082	0.104749	0.0614976	0.220706	1.12656	0.267805	0.00318043	-0.0158276	0.311581	0.55045
A_23_P123853	-1.38343	-0.975786	-0.525237	-0.779238	-2.11558	-2.5614	-2.78907	-1.71592	-4.65967	-1.40441
A_23_P12386	-0.727608	-0.139032	0.596888	1.63028	-0.657104	-0.543231	-0.268409	0.100659	-0.954228	-0.0301901
A_23_P123866	-1.03629	-0.0624874	-0.334049	-0.697782	-0.344646	-0.208935	-0.473603	-0.310856	0.537772	-0.0308851
A_23_P123874	0.166426	0.389436	0.751739	1.24476	1.2384	-0.0738618	0.658058	1.50963	0.534469	-0.168957
A_23_P123882	-0.161001	-0.230139	0.195571	-0.599909	-0.463066	-1.11935	-0.66067	-0.0333754	-0.62245	-0.469021
A_23_P123905	2.11795	-1.98306	1.12129	1.02424	2.08331	0.889963	0.665634	1.56051	0.141262	1.46118
A_23_P123916	-0.518748	-0.433223	-0.777418	-0.381694	-0.520174	-0.941491	-0.534347	-0.672493	-0.805774	-0.540845
A_23_P12392	-1.56311	-0.874925	-0.587235	-0.985823	-0.173058	-0.858841	-1.76341	-0.792383	-0.0421913	-1.33143
A_23_P123943	0.134054	0.173938	0.387326	0.19804	0.633558	0.569157	0.738014	0.718652	0.447738	0.674099
A_23_P123974	0.722428	-0.288195	0.636077	-0.883551	1.19945	0.611405	-0.785542	0.485994	0.214392	0.512576
A_23_P123987	-0.128263	-0.29812	0.0387537	0.290579	0.715422	0.190899	-0.192336	0.199403	-0.723942	-0.239311
A_23_P124003	0.11539	0.377652	-0.0116575	-0.51407	-0.132722	-0.445032	-0.361934	-0.30873	-0.102781	-0.369078
A_23_P124022	1.92238	0.737665	0.997168	-0.326826	1.05664	1.93199	-0.205506	0.192002	-0.492277	1.37856
A_23_P124024	0.00207481	0.530527	0.203826	0.0265218	-0.471772	-0.44059	0.777227	-0.361368	-0.176794	0.084938
A_23_P124035	2.08638	1.19767	1.26163	2.06671	2.21829	1.35349	1.34738	1.2795	1.00836	1.09608
A_23_P124044	-0.0475544	0.574198	0.545672	0.105287	0.819211	0.267951	-0.211626	-0.534951	0.228244	0.364212
A_23_P12405	-0.674837	-0.690301	-0.498818	-0.812037	-0.995723	-1.0058	-0.352064	-1.07842	-0.241569	-1.01212
A_23_P124078	0.419269	-0.38645	0.172813	-0.125708	0.385571	0.24815	0.141895	-0.291367	-0.111596	0.649265
A_23_P124084	-0.968095	-0.626909	0.184948	1.35662	1.06703	-0.359937	-0.80313	0.391775	2.12082	-0.603548
A_23_P124095	-0.498762	-0.0125713	-0.593113	-0.0346988	-0.663604	-0.340144	0.288456	0.0512331	1.12379	-1.22563
A_23_P124108	-1.71748	-1.3559	-1.32977	-0.487911	-1.32185	-1.44166	-1.1466	-1.7804	-0.914541	-1.58967
A_23_P124122	1.86424	0.701427	1.18314	1.89895	3.16471	2.18061	1.3556	1.51377	2.03813	1.97121
A_23_P124132	-0.263989	-0.18809	-0.0582445	-0.811926	-0.411865	0.780145	-0.757851	-0.535835	0.936085	0.456587
A_23_P124164	0.309715	0.0643516	0.462478	-0.156319	0.750722	0.0479983	-0.975792	-0.147288	-0.277953	-0.283821
A_23_P124177	-0.736592	-0.0976788	-2.80438	-0.714442	0.0407321	-0.00503019	-0.29769	-0.669614	-0.144045	-0.362103
A_23_P124190	0.146168	-0.402372	-1.62257	-0.454533	-0.328287	-0.212584	0.223196	-0.370707	0.200185	-0.166448
A_23_P124202	-0.0671309	-0.37264	0.0601977	-0.0809546	0.232822	-0.152928	-0.386772	-0.0534182	-0.472686	-0.602717
A_23_P124224	1.28602	-0.0853722	-0.418698	0.895771	0.0344213	0.235132	0.819737	-0.538914	0.134926	0.363398
A_23_P12423	-0.080148	0.612312	-0.126015	0.24848	0.170117	-0.542424	-0.13939	-0.531405	-0.58186	-0.311978
A_23_P124232	-0.222898	1.06656	-0.0197989	0.201832	-0.498479	0.175197	-0.187316	0.0700422	0.264161	0.296203
A_23_P124252	0.50088	-0.184995	-0.0417874	-0.117312	0.741991	0.051619	0.337707	0.181036	0.54498	0.214979
A_23_P124300	-0.429061	-0.718863	-0.467076	-0.428446	-0.663775	-0.0869678	-0.3535	0.159484	-0.0125566	-0.625929
A_23_P124313	0.505673	-0.474692	0.0828264	0.341985	-0.819332	0.366515	0.141213	-0.215913	-0.277011	-0.243267
A_23_P124327	-0.360076	-0.201902	-0.941764	0.547724	-1.29043	-1.49938	-1.1397	-1.90368	-1.37866	-1.85928
A_23_P124335	-0.633087	0.0179763	-0.123288	-0.58313	-0.928995	-0.759555	-0.59907	-0.935819	-0.620997	-0.729044
A_23_P124343	-0.18069	2.018	-0.0861132	-0.0190474	0.624629	-0.751552	0.868525	-0.0244784	0.850855	0.0187954
A_23_P12435	0.26069	-0.66473	0.691173	-0.502344	-0.370443	-0.697094	0.0105012	0.00770095	-0.142996	-0.505296
A_23_P124356	-0.167694	0.52009	-0.200619	-0.188023	0.268458	0.432124	0.546654	-0.342203	1.09482	0.339153
A_23_P124358	0.201573	0.897454	0.355362	-0.444182	0.277399	0.729316	0.165926	1.27835	1.09683	1.11759
A_23_P124377	-0.623264	-0.0978329	-0.0481227	0.136386	0.107629	-0.283609	0.0485107	-0.277816	1.54282	0.527607
A_23_P124384	-0.256893	0.330113	0.367472	0.363324	0.840946	0.441303	0.485269	0.0403826	0.852596	0.513826
A_23_P124402	-0.280211	-0.14109	-0.135621	-0.179497	-1.13916	-0.8903	-0.497216	-0.321687	-0.655714	-0.246423
A_23_P124417	3.31031	1.71893	3.11424	2.53213	3.2083	1.94963	2.3985	2.75416	2.54739	2.99031
A_23_P124427	-0.441113	-0.223699	0.075865	-0.25477	-0.292673	0.079343	0.762657	0.292859	-0.144042	-0.441198
A_23_P124438	1.13684	0.727071	0.851365	-0.392195	0.21178	2.29275	0.856783	0.172037	0.48128	0.0754404
A_23_P124456	0.459081	0.827203	0.4104	-0.465335	0.527666	0.910025	0.712379	0.377914	1.10212	0.518844
A_23_P124476	1.09595	0.145805	0.0414276	0.537766	0.365087	2.44391	0.797918	0.281391	1.98851	0.985098
A_23_P124486	-1.25256	-0.673541	-0.33659	-0.864296	-0.78109	-0.396939	-0.718151	-0.106561	0.0590828	-0.528845
A_23_P124514	-0.253029	-0.242598	-1.12414	-2.02005	0.555052	-0.0726585	0.198813	-1.05524	-1.6467	0.0160361
A_23_P124522	-0.804795	-0.0529264	-0.187232	-1.60464	-1.25622	-0.382151	-0.585886	-1.281	-0.632922	0.0289125
A_23_P124534	0.288153	0.539138	0.089656	-0.1873	0.386084	-0.420487	-0.481127	-0.340765	1.17419	0.256793
A_23_P124542	1.18499	1.23169	1.09631	0.789439	1.02091	0.515744	1.31212	0.904313	0.793712	1.15752
A_23_P124559	-1.29804	-1.0047	-1.51129	-0.922133	-1.5221	-1.6711	-1.58266	-1.66661	-1.60062	-1.08664
A_23_P124570	0.635356	0.536661	0.311928	-0.316831	-0.171365	0.140687	-0.255605	-0.479301	0.464534	-0.0530844
A_23_P124585	1.20204	1.27343	0.491317	0.563724	2.36913	2.46092	2.21637	2.79118	0.977003	0.402222
A_23_P124619	-0.296729	-0.558622	-0.388318	-1.53991	-0.453608	-0.681149	-0.3886	-1.10946	-1.58608	-0.351053
A_23_P12463	0.106529	-0.141967	-1.72923	2.80187	0.331665	1.41108	-1.17413	-0.371182	-0.0109667	-0.238605
A_23_P124632	-0.737558	0.153572	0.032291	-0.408143	0.270391	-0.878757	-0.574519	-0.398424	-0.864146	-0.523219
A_23_P124642	1.96702	0.801315	0.683384	1.8199	-0.961985	0.310239	2.79054	-1.39737	0.105373	1.07748
A_23_P124661	1.22314	1.78392	1.31593	0.834287	0.676899	0.673871	0.0104368	0.374325	1.41368	0.598851
A_23_P124699	-0.582681	-0.370811	-0.049935	-0.504439	-1.13113	-0.856712	-1.07973	-0.132065	-0.615596	-1.01274
A_23_P124733	-0.396497	0.117325	0.0239035	0.23411	1.58257	0.16793	0.899759	-0.0394965	0.518204	0.213766
A_23_P124742	0.674928	1.40699	0.479047	-0.887295	1.09194	1.44459	0.506562	1.24288	0.766628	1.84098
A_23_P124760	-0.911009	-0.777234	-0.806991	-0.962489	-1.88629	-1.04811	-1.0874	-1.01208	-0.907346	-0.942498
A_23_P12477	0.212419	0.124243	-0.612327	-0.396922	0.125858	0.151074	-0.455473	-0.209258	0.260684	-1.06084
A_23_P1248	-0.688923	-0.841491	-0.566321	-0.606331	0.485224	-0.337433	-0.293851	-0.685178	0.252703	-0.266529
A_23_P124805	-0.677266	0.567667	-0.432708	-0.398298	-0.192384	-0.452363	1.0831	0.275145	0.166347	0.221074
A_23_P124823	2.28735	1.02749	1.4194	1.8909	1.82769	2.24876	2.99243	3.07351	1.70682	1.94596
A_23_P124837	-0.282636	-0.30833	-0.0693349	-0.351374	-1.09397	-0.648731	-0.976289	-0.799467	-1.03678	-0.904186
A_23_P124855	2.10384	1.08988	0.558529	0.905242	0.703752	0.800852	0.696578	0.977967	0.565235	1.59593
A_23_P124892	-0.818821	-0.645434	-0.551006	-0.761822	-0.588591	-0.921183	-1.04003	-1.35949	-0.365797	-1.12948
A_23_P124905	4.48453	4.46655	4.15256	4.26142	3.34934	3.52644	3.05281	3.6069	3.80605	4.09744
A_23_P124912	0.579026	-0.162162	0	0.26415	1.03947	-0.0315845	0.501987	-0.838505	0.778884	1.01396
A_23_P124927	-0.347309	-0.281326	0.114386	0.0417133	-0.870896	0.0818567	-0.697121	-0.213396	-0.569067	-0.188165
A_23_P124934	0.0667492	0.0638983	-0.408049	-0.417316	-1.54121	-0.768324	-1.46426	-1.49902	-0.793877	-1.49882
A_23_P124946	0.111143	-0.380536	-0.100582	0.214362	-1.16485	0.511286	0.425086	-0.204637	0.00903947	-0.200246
A_23_P124962	-1.33224	-0.434511	-0.565629	-2.58865	-1.69773	-2.89742	-2.29504	-2.34014	-2.47147	-2.18184
A_23_P124977	-0.576441	-0.532591	-0.36583	-0.673206	0.106197	-1.00646	-0.449356	-0.821811	0.212454	-0.208575
A_23_P124988	-1.00248	-0.4934	-0.713571	-0.871047	-0.697589	-0.218933	-0.643662	-0.20631	-0.0460034	-0.581019
A_23_P125001	-1.2488	-1.14804	-1.11892	-1.82142	-1.02376	-1.56961	-1.78166	-1.13695	-1.18309	-1.18445
A_23_P125016	0.506325	0.683108	0.475299	0.708189	0.67857	0.0235672	-0.576248	0.731182	-0.925318	0.240696
A_23_P12503	0.396692	-0.500411	-0.685766	0.713257	1.88194	1.36829	0.853478	0.733458	1.26013	1.00896
A_23_P125033	-0.235004	-0.286682	-0.67589	-0.534631	-0.628655	0.428069	-0.328676	-0.499117	-0.822927	0.23718
A_23_P125042	-0.590159	-0.832922	0.34635	-0.279583	-0.121463	0.142224	-0.974603	-0.76681	-0.163079	-0.785687
A_23_P125056	-1.57703	-1.08435	-1.05899	-1.93569	-2.64941	-2.0233	-1.98881	-2.06669	-1.7835	-1.91489
A_23_P125067	0.255946	0.00349756	-0.0491813	0.371135	1.26841	0.120323	0.109325	-0.461678	-0.248166	-0.214725
A_23_P125078	-1.71688	-0.879281	-0.752027	0.0702931	-0.105582	0.383897	-0.647309	-1.26964	0.303617	0.438267
A_23_P125082	-0.155457	-0.287354	-0.775998	-0.0789516	-0.313938	0.0774556	0.466428	0.821971	-0.322982	-0.187443
A_23_P125107	-0.594939	-0.589161	-0.829458	-0.908351	-1.58065	-1.38952	-1.09917	-1.27956	-2.08038	-1.37507
A_23_P125109	1.1946	-0.284196	-0.542874	1.59262	-1.33914	-0.984681	1.41162	0.117857	-1.79374	-0.46356
A_23_P125117	1.43838	1.09884	0.373623	0.747845	0.618492	1.21998	1.1963	0.0923018	0.997129	-0.455532
A_23_P12514	0.389059	0.474499	-0.958657	-0.694185	-0.670065	-0.370832	-0.0217819	-1.97487	-1.43063	-0.829904
A_23_P125147	0.0590635	-0.150572	0.486589	-0.0628025	-0.0576256	-0.0428671	0.821753	0.0888713	-0.192631	-0.403237
A_23_P125157	0.156449	-0.134565	0.080036	0.305277	0.319358	0.516818	0.108888	-0.00973968	0.174384	0.300274
A_23_P125164	0.738372	1.02685	-0.0268216	0.0101729	-0.483733	-0.0102621	-0.476517	1.73165	0.557197	-1.49033
A_23_P125171	-0.00797962	-0.39944	-0.710555	-0.365904	-0.212089	-0.611691	-1.18907	0.293353	-0.566232	-0.230639
A_23_P125176	-0.600992	-0.12712	-0.0214153	-0.0988672	-0.677868	-0.838562	-0.233411	0.467425	-0.102681	0.365665
A_23_P125204	-0.851109	-0.520616	-0.431206	-0.565712	-0.19977	-0.427371	-0.688221	-0.867596	-0.958342	-0.6513
A_23_P125233	0.500791	-0.0804243	0.937425	-0.631153	0.413348	-2.753	-2.38199	-1.16107	0.4047	-0.811207
A_23_P125253	0.0775169	-0.214131	0.0516989	-0.216775	0.197387	1.09794	-0.880389	-0.190691	-0.263446	0.140808
A_23_P12526	0.814212	0.821739	0.562274	0.767688	0.961612	0.863662	1.15788	0.292458	0.65314	0.302266
A_23_P125265	3.65864	1.30917	2.89565	1.53598	5.26834	2.5673	3.23249	3.00777	3.31935	3.69713
A_23_P125278	-1.04359	0.406467	-0.112433	0.313514	-0.518568	-0.492009	1.85149	0.261239	-0.531205	1.18248
A_23_P125286	-0.136229	0.0568718	-0.0682133	-0.261885	0.373762	-0.0965134	1.01366	-0.0545165	0.0598477	-0.148821
A_23_P125303	0.170588	0.102519	-0.105669	0.802069	0.526148	-0.132589	-0.372841	-0.290272	0.208333	-0.0198409
A_23_P12533	-0.419446	0.121337	-1.9891	-0.583827	-0.634347	-1.05315	-0.692867	-1.19548	-0.890418	0.648615
A_23_P125348	-1.13279	-0.589874	-0.620477	-0.952329	-1.06349	-1.04559	-0.787971	-1.503	-0.897631	-0.566121
A_23_P125383	1.85202	-0.953882	0.0282783	0.128726	-0.130526	0.632743	0.164599	-0.042618	-0.357448	-0.426139
A_23_P1254	2.58826	1.39519	2.43587	1.85833	2.77289	2.6582	2.24032	2.24525	2.39196	3.2773
A_23_P125408	-0.883748	-0.320084	-0.53408	-0.944994	0.0168558	-1.2828	-0.736299	-0.345887	-0.825035	-0.862799
A_23_P125420	0.229605	-0.902946	-0.905804	-0.801275	1.02255	1.09046	0.341011	-0.0176198	0.781967	1.09345
A_23_P125423	-0.961103	-3.04833	-1.67609	1.03794	-2.32359	-1.86215	-1.54891	-0.663737	-0.703256	-3.07049
A_23_P125435	0.399806	2.52313	1.29496	2.25126	-0.884882	2.39608	1.85072	2.05601	1.46585	0.728305
A_23_P125451	0.505441	-0.0397371	-0.0114545	0.137381	0.575272	-0.265584	0.127864	1.54821	0.29462	0.198101
A_23_P125475	-0.0943646	-0.137203	-0.0551673	0.0140056	0.165158	-0.638206	-0.343568	-0.417948	-0.555599	-0.683909
A_23_P12549	-0.10452	0.332321	-0.0350433	0.268403	-0.051162	-0.181211	0.129799	0.346434	0.450772	-0.137773
A_23_P125495	-0.40289	-0.159017	-0.288843	-0.232747	-0.814608	-0.712428	-0.372785	-0.736251	-0.267075	-0.483151
A_23_P125505	-0.653051	-0.455619	-0.339471	0.4679	0.395529	-0.520994	0.304027	-0.718859	0.016595	0.332814
A_23_P125519	1.73577	1.23908	0.13837	0.796624	2.22426	2.44482	2.79197	1.73333	0.588518	0.279264
[truncated: 39,099 more rows]
